# Supplementary material for: Echoes of ancient introgression punctuate stable genomic lineages in the evolution of figs
Source: PubMed Central journal article supplement — Proc Natl Acad Sci U S A. 2023 Jul 3;120(28):e2222035120. doi: 10.1073/pnas.2222035120 (PMC10334730; doi:10.1073/pnas.2222035120), 2023-07-03
Supplement: pnas.2222035120.sapp.pdf [file pnas.2222035120.sapp.pdf]

## **Supporting Information for**

### **Echoes of ancient introgression punctuate stable genomic lineages in the evolution of figs**

Elliot M. Gardner, Sam Bruun-Lund, Matti Niissalo, Bhanumas Chantarasuwan, Wendy L. Clement, Connie Geri, Rhett D. Harrison, Andrew L. Hipp, Maxime Holvoet, Gillian Khew, Finn Kjellberg, Shuai Liao, Leandro Cardoso Pederneiras, Yan-Qiong Peng, Joan T. Pereira, Quentin Phillipps, Aida Shafreena Ahmad Puad, Jean-Yves Rasplus, Julia Sang, Sverre Juul Schou, Elango Velautham, George D. Weiblen, Nyree J.C. Zerega, Qian Zhang, Zhen Zhang, Christopher Baraloto and Nina Rønsted

Corresponding author: Elliot Gardner

Email: [egardner@fiu.edu](mailto:egardner@fiu.edu)

#### **This PDF file includes:**

Figures S1 to S7

Tables S1 to S3

References

#### **Other supporting materials for this manuscript include the following:**

Dataset S1

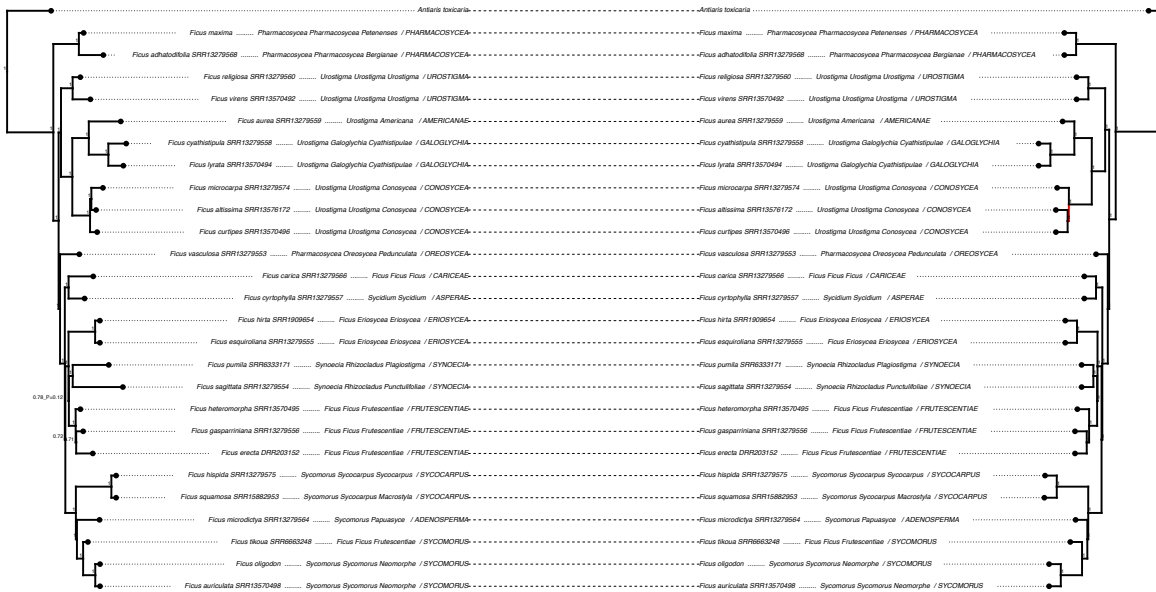

**Figure S1.** Targeted loci versus whole-genome trees. Left: pruned nuclear species tree based on 1,858 nuclear genes. Right: nuclear species tree based on 16,449 genes. Node support denotes Local Posterior Probability (LPP). Unlabeled nodes have LPP=1.0.

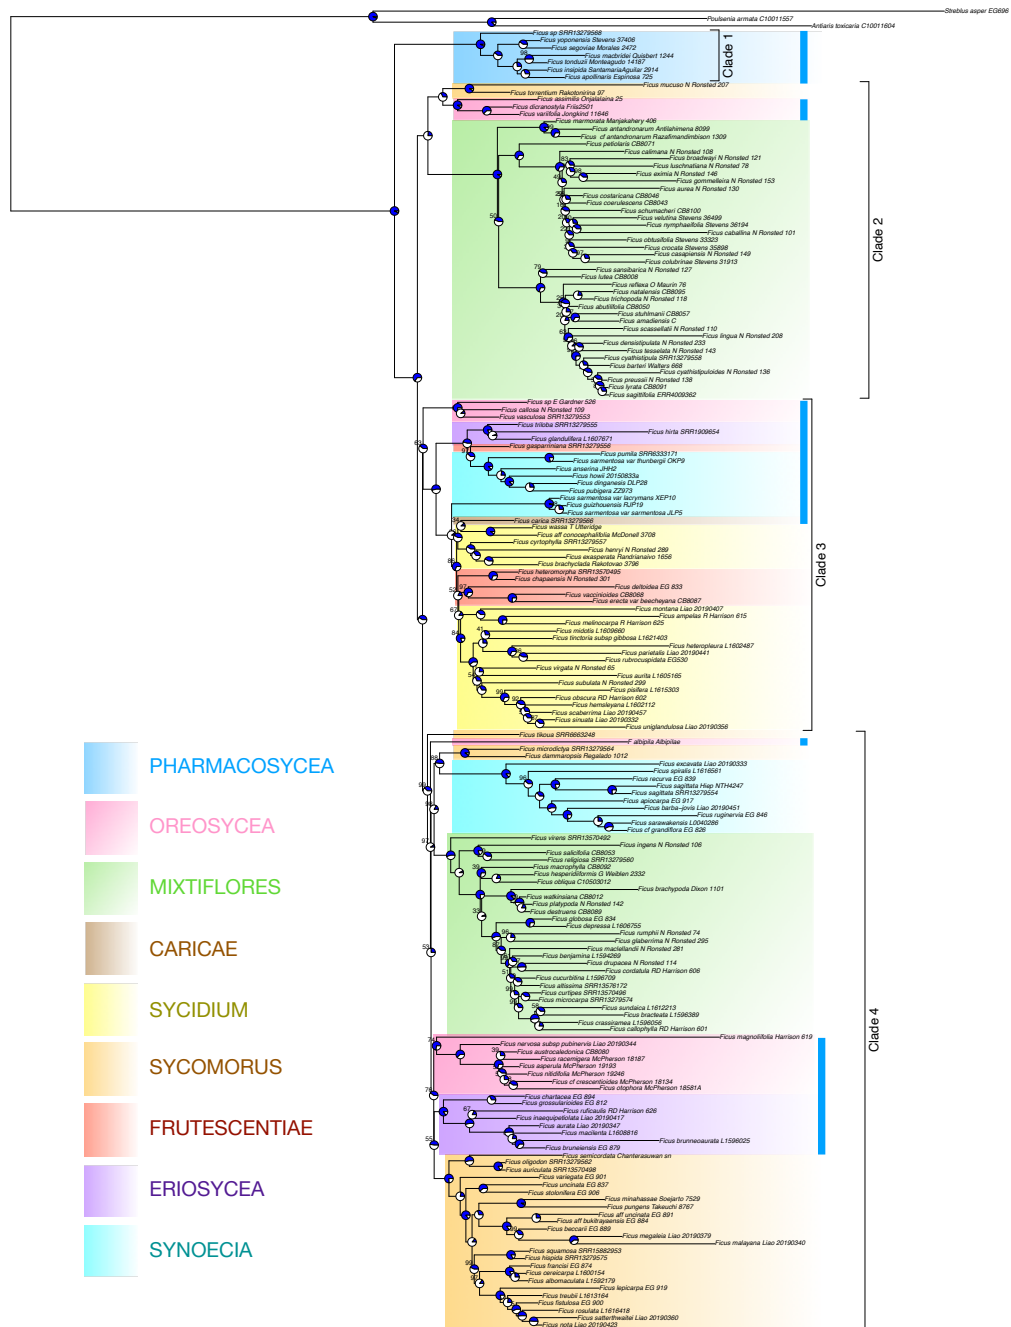

**Figure S2.** Maximum-likelihood tree based on whole chloroplast sequences. Node labels are bootstrap support (unlabeled nodes have 100% support). Pie charts indicate the proportion of nuclear quartets supporting each split (below). Clade labels at right refer to the four clades discussed in the main text. Blue bars at right denote taxa pollinated by members of subfamily Blastophaginae.

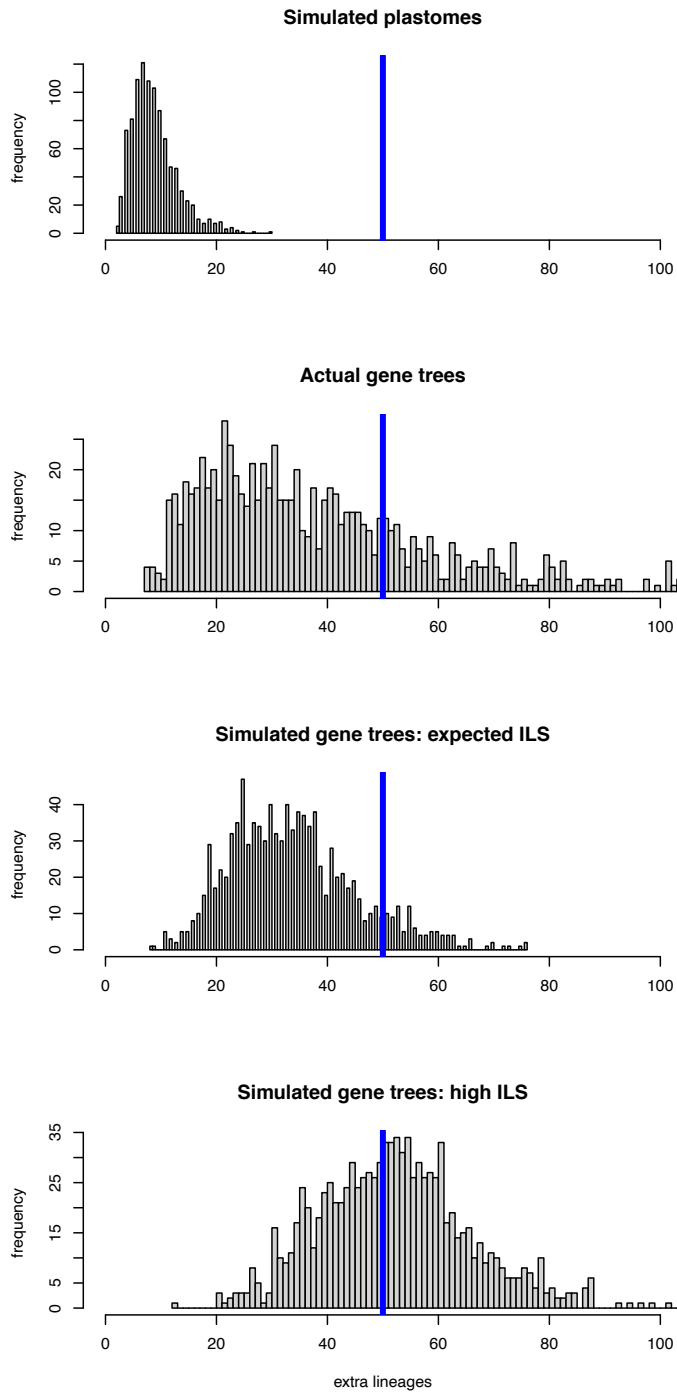

**Figure S3.** Histogram plots of simulation results, showing the number of extra lineages compared to the nuclear species tree, starting from the top, for (1) simulated chloroplast trees, (2) actual nuclear gene trees, (3) simulated nuclear gene trees under expected incomplete lineage sorting, and (4) simulated nuclear gene trees under high incomplete lineage sorting.

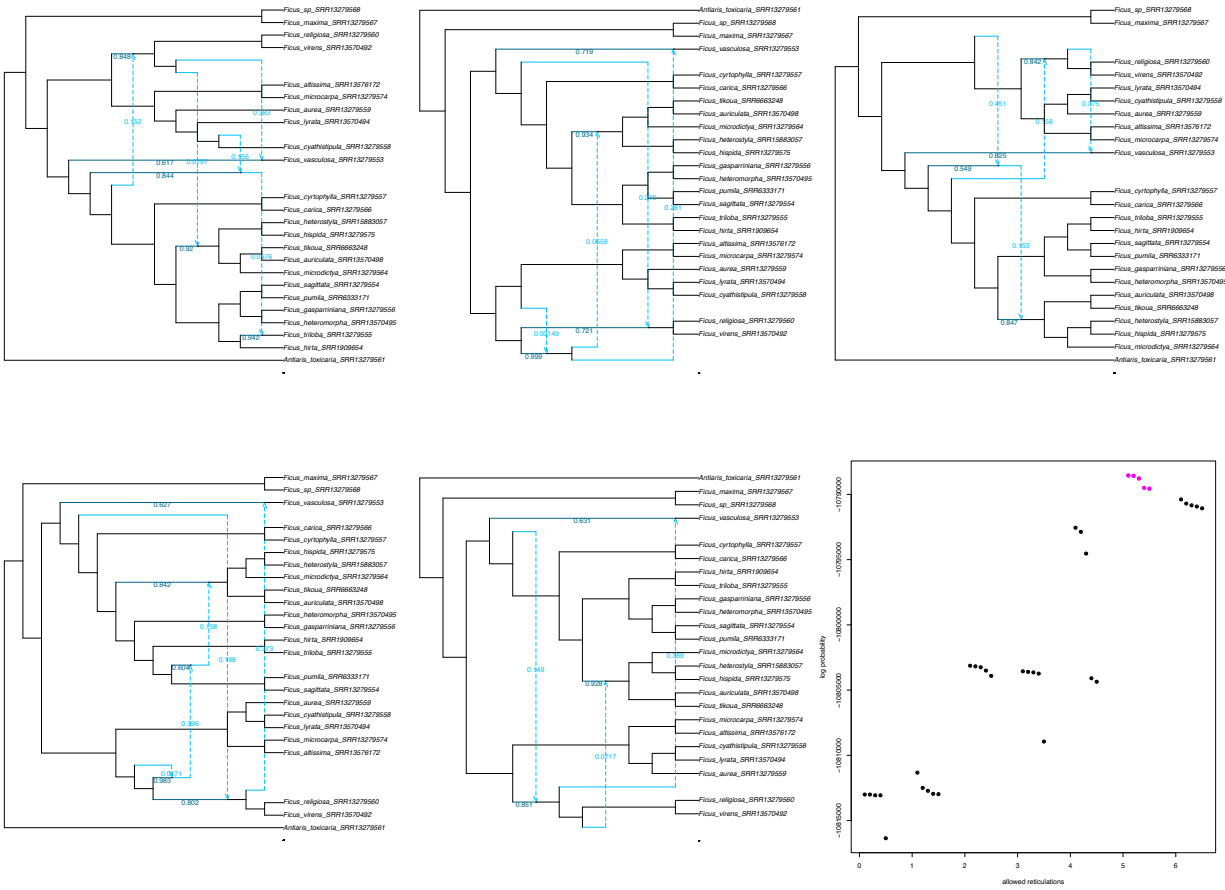

**Figure S4.** The best five maximum-pseudo-likelihood networks (in descending order from left to right, top to bottom) based on 13,586 nuclear gene trees, allowing 5 reticulations. Bottom right: plot of network scores for the best five networks each for 0 through 6 reticulations, with those allowing 5 reticulations highlighted. Inheritance probabilities appear in light blue for reticulated (minor) edges and in dark blue for the corresponding branches on the major (bifurcating) tree.

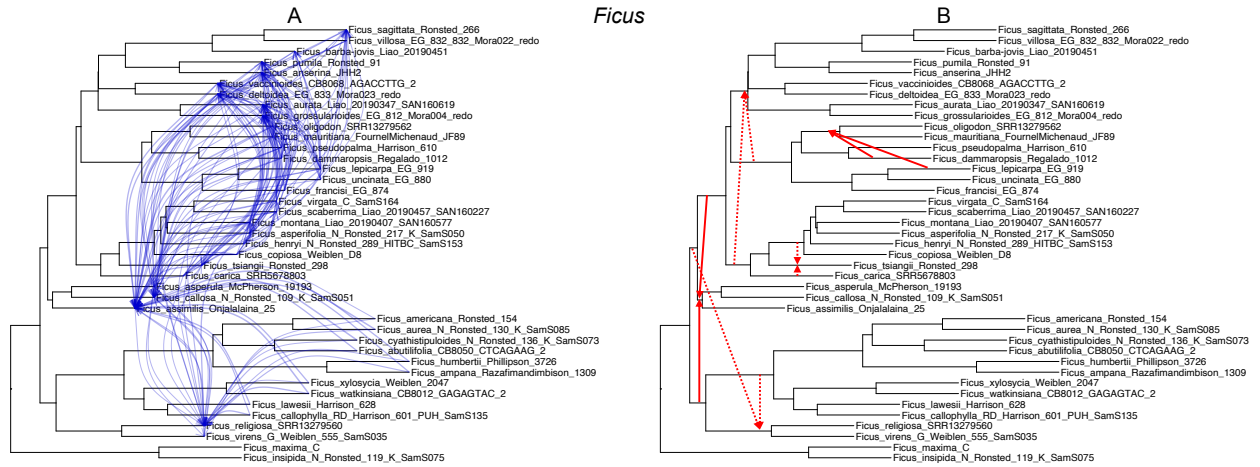

**Figure S5.** Analysis of gene tree conflict based on rooted triplet trees. A. All possible introgression events evident in the triplet trees. B. Interpretation of these events mapped onto the nuclear species tree.

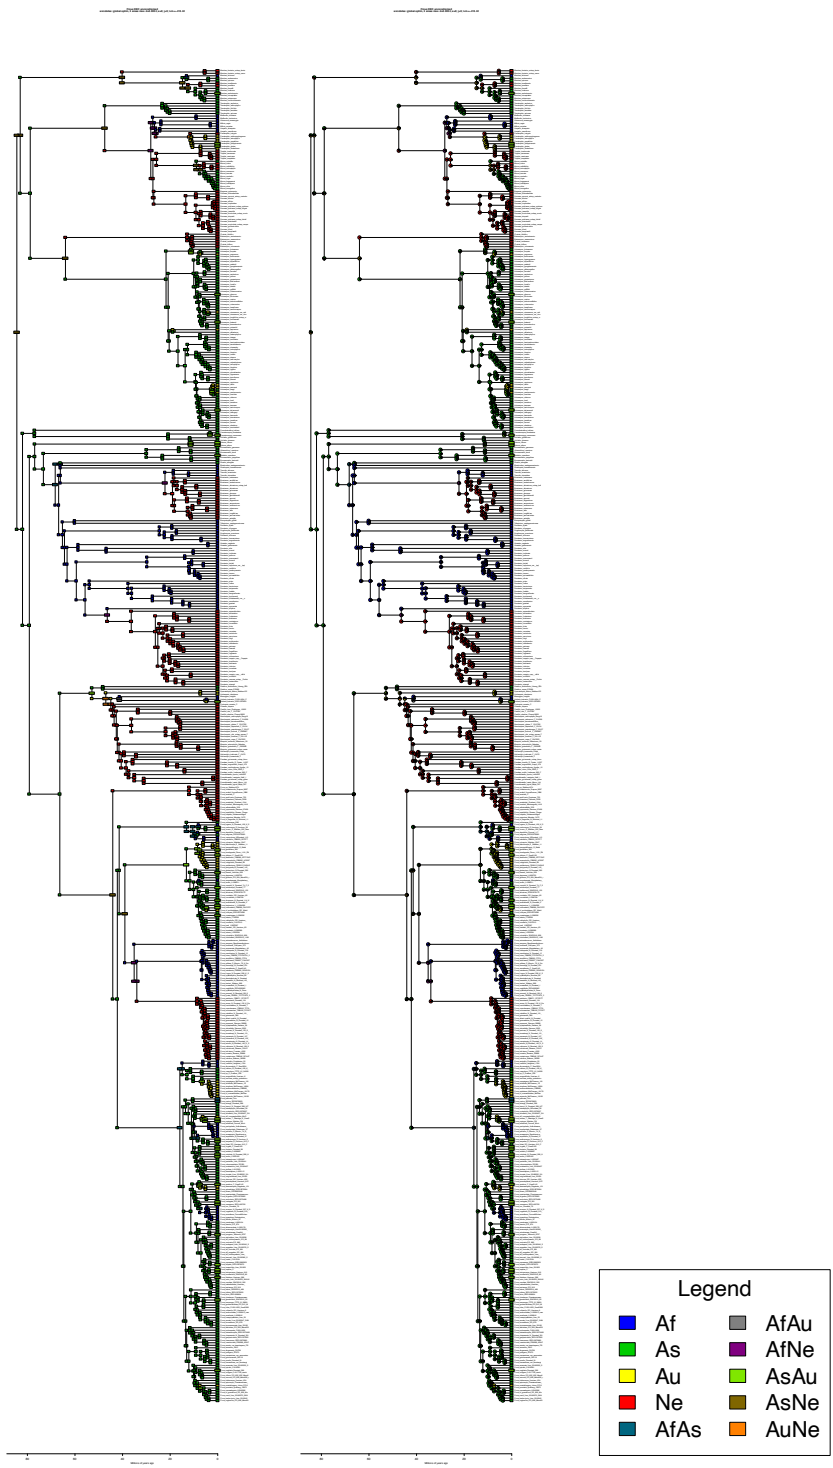

**Figure S6.** Full DEC results for Moraceae. Left: most likely states. Right: pie charts showing proportional likelihoods for all states.

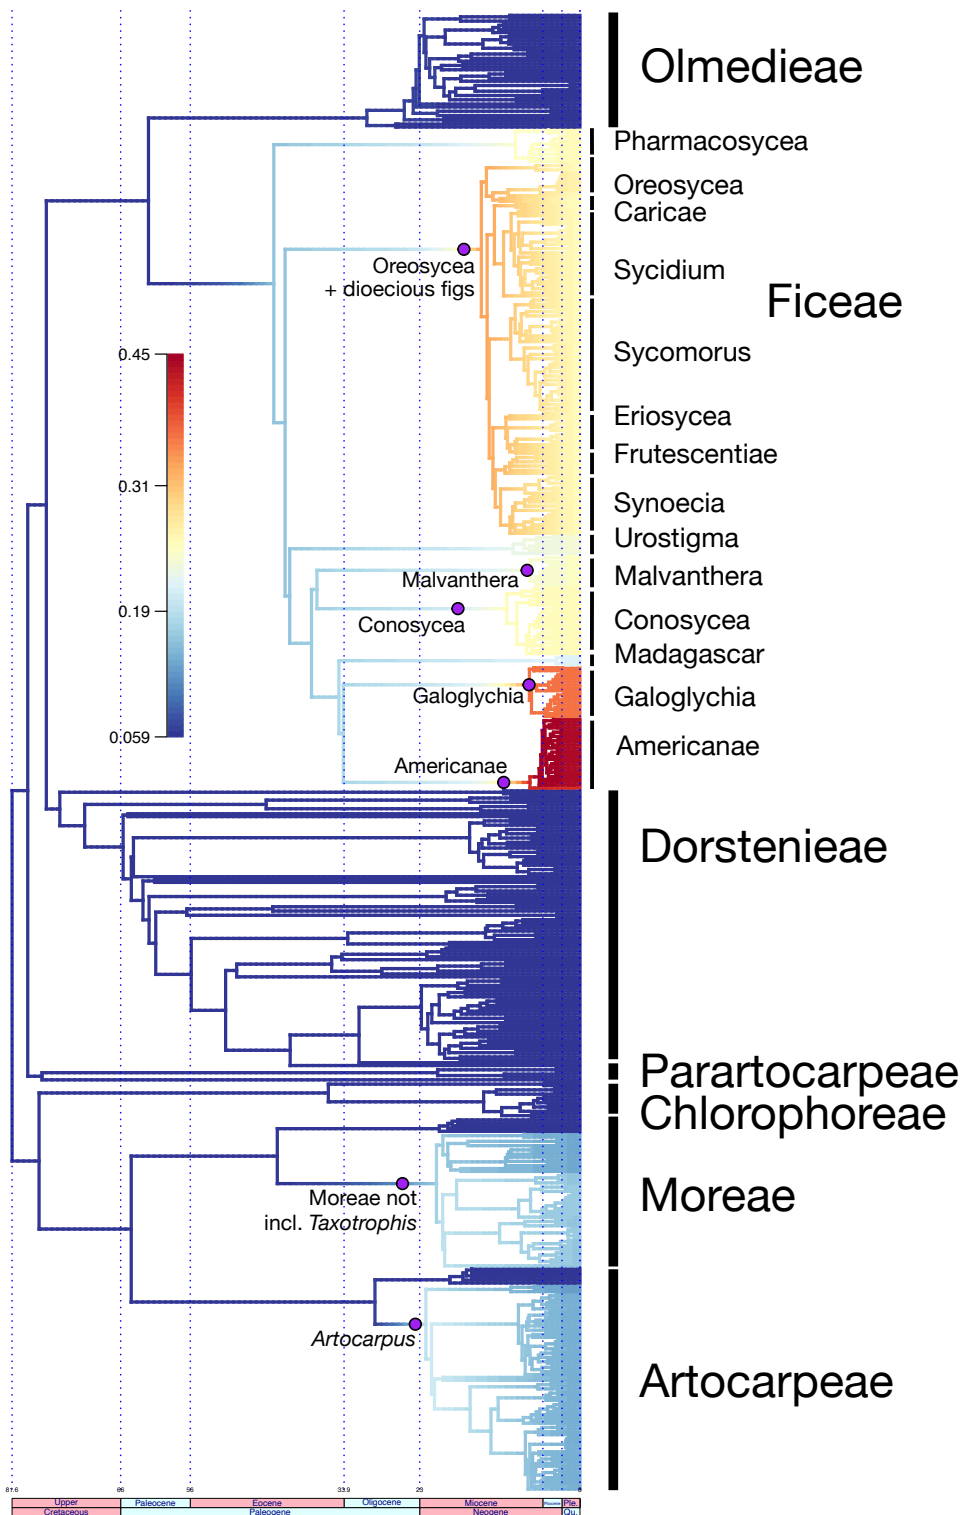

**Figure S7.** Time-calibrated phylogenetic tree with rate shifts inferred by BAMM (purple circles) and reticulations inferred by PhyloNet (dotted lines).



## Tables

**Table S1.** Sample table. Samples used in this study, showing taxon, clade (following Clement et al. (1)), voucher information, locality, year collected, herbarium / barcode, label in phylogenetic trees, source of reads, Genbank SRA accession. References for read sources appear below the table.

| <b>Taxon</b>                                                      | <b>Tribe</b> | <b>voucher</b>                                             | <b>locality</b>           | <b>year</b> | <b>herbarium./<br/>.barcode</b> | <b>label</b>                                | <b>Source</b> | <b>SRA</b>  |
|-------------------------------------------------------------------|--------------|------------------------------------------------------------|---------------------------|-------------|---------------------------------|---------------------------------------------|---------------|-------------|
| <i>Afromorus mesozygia</i><br>(Stapf) E.M.Gardner                 | Moreae       | Daramola 330                                               | Africa                    | F           | Nigeria                         | Afromorus_mesozygia                         | 2             | SRR12282929 |
| <i>Allaeanthus luzonicus</i><br>(Blanco) Fern.-Vill.              | Dorstenieae  | Kuo-fang Chung<br>2016                                     | Philippines               |             | HAST                            | Allaeanthus_luzonicus                       | 3             | SRR13092433 |
| <i>Ampalis dimepate</i> Bureau                                    | Moreae       | Rakotonirina &<br>al. 405                                  | Madagascar                | 2014        | MO                              | Ampalis_dimepate                            | 2             | SRR12282873 |
| <i>Ampalis mauritiana</i><br>(Jacq.) Urb.                         | Moreae       | Rakotonirina &<br>Be 489                                   | Madagascar                |             | MO<br>C,                        | Ampalis_mauritiana<br>Antiaris_toxicaria_C1 | 2             | SRR12283062 |
| <i>Antiaris toxicaria</i><br>(J.F.Gmel.) Lesch.                   | Olmedieae    | I. Friis 13236                                             | Ethiopia                  | 2009        | C10011604                       | 0011604                                     | this study    | SRR24706427 |
| <i>Antiaropsis decipiens</i><br>K.Schum                           | Olmedieae    | Zerega & al. 281<br>Breadfruit<br>Institute grid no.<br>K7 | Papua New Guinea          | 2000        | NY                              | Antiaropsis_decipiens                       | 4             | SRR3907583  |
| <i>Artocarpus altilis</i><br>(Parkinson) Fosberg                  | Artocarpeae  |                                                            | USA (cult. from<br>Samoa) | 2000        | PTBG                            | Artocarpus_altilis                          | 5             | SRR12282879 |
| <i>Artocarpus altissimus</i><br>(Miq.) J.J. Smith                 | Artocarpeae  | Gardner & al. 441                                          | Java (cult.)              | 2016        | F                               | Artocarpus_altissimus                       | 5             | SRR12283100 |
| <i>Artocarpus anisophyllus</i><br>Miq.                            | Artocarpeae  | Zerega & al. 606                                           | Borneo                    | 2013        | CHIC                            | Artocarpus_anisophyllus                     | 5             | SRR3907106  |
| <i>Artocarpus annulatus</i><br>F.M.Jarrett                        | Artocarpeae  | Zerega & al. 985                                           | Borneo                    | 2016        | F                               | Artocarpus_annulatus                        | 5             | SRR12283099 |
| <i>Artocarpus bergii</i> E.M.<br>Gardner, Arifiani &<br>Zerega    | Artocarpeae  | Mahroji & al. 160                                          | Moluccas                  | 2013        | BO, L, MO                       | Artocarpus_bergii                           | 5             | SRR12283019 |
| <i>Artocarpus blancoi</i><br>(Elmer) Merr.                        | Artocarpeae  | Ramos 42018                                                | Philippines               | 1920        | L                               | Artocarpus_blancoi                          | 5             | SRR12282902 |
| <i>Artocarpus borneensis</i><br>Merr.                             | Artocarpeae  | Zerega & al. 686                                           | Borneo                    | 2013        | F, SAN                          | Artocarpus_borneensis                       | 5             | SRR12283067 |
| <i>Artocarpus<br/>brevipedunculatus</i><br>(F.M.Jarrett) C.C.Berg | Artocarpeae  | Zerega & al. 814                                           | Borneo                    | 2013        | F, SAN                          | Artocarpus_brevipedu<br>nculatus            | 5             | SRR3907332  |
| <i>Artocarpus calophyllus</i><br>Kurz                             | Artocarpeae  | Zerega & al. 507                                           | Thailand                  | 2012        | CHIC                            | Artocarpus_calophyllus                      | 5             | SRR12283043 |

|                                                                        |             |                                                |                      |      |                                               |                                 |   |             |
|------------------------------------------------------------------------|-------------|------------------------------------------------|----------------------|------|-----------------------------------------------|---------------------------------|---|-------------|
| <i>Artocarpus camansi</i><br>Blanco                                    | Artocarpeae | Gardner 149                                    | USA (cult.)          | 2015 | PTBG                                          | <i>Artocarpus_camansi</i>       | 6 | SRR12283098 |
| <i>Artocarpus chama</i> Buch.-<br>Ham.                                 | Artocarpeae | Zerega & al. 354                               | Bangladesh           | 2011 | F                                             | <i>Artocarpus_chama</i>         | 5 | SRR12283079 |
| <i>Artocarpus clementis</i><br>Merr.                                   | Artocarpeae | Zerega & al. 739                               | Borneo               | 2012 | F, SAN                                        | <i>Artocarpus_clementis</i>     | 5 | SRR3907263  |
| <i>Artocarpus corneri</i><br>Kochummen                                 | Artocarpeae | Fuchs 21347                                    | Borneo               | 1963 | K, SAR                                        | <i>Artocarpus_corneri</i>       | 5 | SRR12283015 |
| <i>Artocarpus dadah</i> Miq.                                           | Artocarpeae | Zerega & al. 694                               | Borneo               | 2013 | F, SAN                                        | <i>Artocarpus_dadah</i>         | 5 | SRR3907210  |
| <i>Artocarpus elasticus</i><br>Reinw. ex. Blume                        | Artocarpeae | Gardner & al. 87                               | Borneo               | 2014 | F, SAN                                        | <i>Artocarpus_elasticus</i>     | 5 | SRR3907457  |
| <i>Artocarpus excelsus</i><br>F.M.Jarrett                              | Artocarpeae | Gardner & al. 222                              | Borneo               | 2016 | F, SAN,<br>SNP                                | <i>Artocarpus_excelsus</i>      | 5 | SRR3907331  |
| <i>Artocarpus fretessii</i><br>Teijsm. & Binnend.                      | Artocarpeae | Zerega & al. 929                               | Borneo               | 2013 | F, SAN                                        | <i>Artocarpus_fretessii</i>     | 5 | SRR3907410  |
| <i>Artocarpus frutescens</i><br>(Becc.) Renner                         | Artocarpeae | Gardner & al. 411                              | Borneo               | 2016 | F, SAN                                        | <i>Artocarpus_frutescens</i>    | 5 | SRR12283088 |
| <i>Artocarpus fulvicortex</i><br>F.M.Jarrett                           | Artocarpeae | Lee YQ 35                                      | Singapore            | 2012 | CHIC, SING                                    | <i>Artocarpus_fulvicortex</i>   | 5 | SRR12283075 |
| <i>Artocarpus glaucus</i><br>Blume                                     | Artocarpeae | Zerega & al. 852                               | Borneo               | 2013 | F, SAN                                        | <i>Artocarpus_glaucus</i>       | 5 | SRR12283074 |
| <i>Artocarpus gomezianus</i><br>Wall. ex Tréc                          | Artocarpeae | Zerega & al. 533                               | Thailand             | 2012 | CHIC, KKU                                     | <i>Artocarpus_gomezianus</i>    | 5 | SRR12283072 |
| <i>Artocarpus gongshanensis</i> S.K. Wu<br>ex. C.Y. Wu & S.S.<br>Chang | Artocarpeae | Gaoligong Shan<br>Biodiversity<br>Survey 24987 | China                | 2005 | HAST, MO                                      | <i>Artocarpus_gongshanensis</i> | 5 | SRR12283006 |
| <i>Artocarpus griffithii</i><br>(King) Merr.                           | Artocarpeae | Zerega & al. 216                               | Malaysia (Peninsula) | 2002 | F                                             | <i>Artocarpus_griffithii</i>    | 5 | SRR12283066 |
| <i>Artocarpus heterophyllus</i><br>Lam.                                | Artocarpeae | Gardner & al. 98                               | Borneo               | 2014 | F, SAN<br>ATREE<br>(photo<br>voucher<br>CHIC) | <i>Artocarpus_heterophyllus</i> | 5 | SRR3907497  |
| <i>Artocarpus hirsutus</i> Lam.                                        | Artocarpeae | Zerega & al. 953                               | India                | 2013 | F, SAN<br>CHIC)                               | <i>Artocarpus_hirsutus</i>      | 5 | SRR12283116 |
| <i>Artocarpus hispidus</i><br>F.M.Jarrett                              | Artocarpeae | Zerega & al. 258                               | Malaysia (Peninsula) | 2002 | F                                             | <i>Artocarpus_hispidus</i>      | 5 | SRR12283071 |
| <i>Artocarpus horridus</i><br>F.M.Jarrett                              | Artocarpeae | Gardner & al. 437                              | Java (cult.)         | 2016 | F                                             | <i>Artocarpus_horridus</i>      | 5 | SRR12283095 |
| <i>Artocarpus humilis</i> Becc.                                        | Artocarpeae | Gardner & al. 258                              | Borneo               | 2016 | F, SAN                                        | <i>Artocarpus_humilis</i>       | 5 | SRR12283050 |
| <i>Artocarpus hypargyreus</i><br>Hance ex. Benth.                      | Artocarpeae | Gardner & al. 170                              | China (Hong Kong)    | 2016 | F, HK                                         | <i>Artocarpus_hypargyreus</i>   | 5 | SRR12283054 |

|                                                                                                                                 |             |                                                                         |                                                      |                      |                   |                                                                                                                         |             |                                           |
|---------------------------------------------------------------------------------------------------------------------------------|-------------|-------------------------------------------------------------------------|------------------------------------------------------|----------------------|-------------------|-------------------------------------------------------------------------------------------------------------------------|-------------|-------------------------------------------|
| <i>Artocarpus integer</i><br>(Thunb.) Merr. var.<br><i>integer</i>                                                              | Artocarpeae | Zerega & al. 918<br>Amin & Francis                                      | Borneo                                               | 2013                 | F, SAN            | <i>Artocarpus_integer</i>                                                                                               | 5           | SRR3907371                                |
| <i>Artocarpus jarrettiae</i><br>Kochummen                                                                                       | Artocarpeae | SAN120933                                                               | Borneo                                               | 1987                 | K, L, SAN         | <i>Artocarpus_jarrettiae</i>                                                                                            | 5           | SRR12282898                               |
| <i>Artocarpus kemando</i> Miq.<br><i>Artocarpus lacucha</i><br>Roxb. ex Buch.-Ham.                                              | Artocarpeae | Zerega & al. 612                                                        | Borneo                                               | 2013                 | F, SAN            | <i>Artocarpus_kemando</i>                                                                                               | 5           | SRR3907163                                |
| <i>Artocarpus lamellosus</i><br>Blanco                                                                                          | Artocarpeae | Zerega & al. 420<br>Gaerlan & al.<br>PPI10374                           | Thailand<br>Philippines                              | 2012<br>1992         | CHIC, KKU<br>L    | <i>Artocarpus_lacucha</i><br><i>Artocarpus_lamellosus</i>                                                               | 5<br>5      | SRR3907082<br>SRR12282893                 |
| <i>Artocarpus limpato</i> Miq.<br><i>Artocarpus longifolius</i><br>Becc. subsp. <i>adpressus</i><br>Berg                        | Artocarpeae | Zerega & al. 609<br>Gardner & al. 412<br>Wang M. & al.                  | Borneo                                               | 2013<br>2016         | F, SAN<br>F, SAR  | <i>Artocarpus_limpato</i><br><i>Artocarpus_longifolius</i><br><i>_subsp_adpressus</i>                                   | 5<br>5      | SRR3907129<br>SRR12283094                 |
| <i>Artocarpus lowii</i> King<br><i>Artocarpus maingayi</i><br>King                                                              | Artocarpeae | MWL2<br>Zerega & al. 257<br>Breadfruit                                  | Malaysia (Peninsula)                                 | 2013<br>2002         | CHIC<br>F         | <i>Artocarpus_lowii</i><br><i>Artocarpus_maingayi</i>                                                                   | 5<br>5      | SRR3907544<br>SRR12283069                 |
| <i>Artocarpus mariannensis</i><br>Trécul                                                                                        | Artocarpeae | institute grid no.<br>DD4                                               | USA (cult. from<br>Micronesia)                       | 2000                 | PTBG              | <i>Artocarpus_mariannen</i><br><i>sis</i>                                                                               | 5           | SRR12283068                               |
| <i>Artocarpus melinoxylus</i><br>Gagnep.                                                                                        | Artocarpeae | D.D. Soejarto &<br>al. 14222                                            | Vietnam                                              | 2008                 | F                 | <i>Artocarpus_melinoxyl</i><br><i>us</i>                                                                                | 5           | SRR12282896                               |
| <i>Artocarpus montanus</i><br>E.M.Gardner & Zerega<br><i>Artocarpus nobilis</i><br>Thwaites                                     | Artocarpeae | Averyanov & al.<br>VH1819<br>Jayasuriya 3283                            | Vietnam<br>Sri Lanka                                 | 1995<br>1985         | LE, MO, P<br>US   | <i>Artocarpus_montanus</i><br><i>Artocarpus_nobilis</i>                                                                 | 5<br>5      | SRR12283017<br>SRR12282895                |
| <i>Artocarpus obtusus</i><br>F.M.Jarrett<br><i>Artocarpus odoratissimus</i><br>Blanco                                           | Artocarpeae | Zerega & al. 729<br>Zerega & al. 618                                    | Borneo<br>Borneo                                     | 2013<br>2013         | F, SAN<br>F, SAN  | <i>Artocarpus_obtus</i><br><i>Artocarpus_odoratissi</i><br><i>mus</i>                                                   | 5<br>5      | SRR12282892<br>SRR12283064                |
| <i>Artocarpus ovatus</i> Blanco<br><i>Artocarpus papuanus</i><br>(Becc.) Renner<br><i>Artocarpus parvus</i><br>Gagnep.          | Artocarpeae | Zerega & al. 202<br>Zerega & al. 61<br>Zerega & al. 911                 | USA (Hawaii)<br>Papua New Guinea<br>Malaysia (cult.) | 2000<br>2000<br>2013 | F<br>NY<br>F, SAN | <i>Artocarpus_ovatus</i><br><i>Artocarpus_papuanus</i><br><i>Artocarpus_parvus</i>                                      | 5<br>5<br>5 | SRR12283115<br>SRR12283063<br>SRR12283061 |
| <i>Artocarpus petelotii</i><br>Gagnep.<br><i>Artocarpus pinnatisectus</i><br>Merr.<br><i>Artocarpus pithecoallus</i><br>C.Y. Wu | Artocarpeae | Soejarto & al.<br>14435<br>Stone & Fuentes<br>PPI3911<br>Li Jianwu 3200 | Vietnam<br>Philippines<br>China                      | 2009<br>1992<br>2013 | F<br>K<br>KUN     | <i>Artocarpus_petelotii</i><br><i>Artocarpus_pinnatisect</i><br><i>us</i><br><i>Artocarpus_pithecoall</i><br><i>lus</i> | 5<br>5<br>5 | SRR3907350<br>SRR12282895<br>SRR12282890  |

|                                                                                   |             |                       |                      |      |           |                                          |   |             |
|-----------------------------------------------------------------------------------|-------------|-----------------------|----------------------|------|-----------|------------------------------------------|---|-------------|
| <i>Artocarpus primackii</i><br>Kochummen                                          | Artocarpeae | Zerega & al. 687      | Malaysia (Borneo)    | 2013 | F, SAN    | Artocarpus_primackii                     | 5 | SRR12282992 |
| <i>Artocarpus rigidus</i> Blume<br>subsp. <i>rigidus</i>                          | Artocarpeae | Zerega & al. 728      | Malaysia (Borneo)    | 2013 | F, SAN    | Artocarpus_rigidus                       | 5 | SRR3907189  |
| <i>Artocarpus rubrosoccatu</i><br>E.M.Gardner, Chaveer. &<br>Zerega               | Artocarpeae | Zerega & al. 517      | Thailand             | 2012 | CHIC, KKU | Artocarpus_rubrosoc<br>atus              | 5 | SRR12283080 |
| <i>Artocarpus rubrovenius</i><br>Warb.                                            | Artocarpeae | Burley 84             | Philippines          | 1987 | F         | Artocarpus_rubroveni<br>us               | 5 | SRR12283021 |
| <i>Artocarpus sarawakensis</i><br>F.M.Jarrett                                     | Artocarpeae | Jugah Kudi<br>S.23876 | Malaysia (Borneo)    | 1965 | L         | Artocarpus_sarawaken<br>sis              | 5 | SRR12282881 |
| <i>Artocarpus scortechinii</i><br>King                                            | Artocarpeae | Zerega & al. 209      | Malaysia (Peninsula) | 2002 | F         | Artocarpus_scortechin<br>ii              | 5 | SRR12283022 |
| <i>Artocarpus sepicanus</i><br>Diels                                              | Artocarpeae | Weiblen & al.<br>1701 | Papua New Guinea     | 2000 | MIN       | Artocarpus_sepicanus                     | 5 | SRR3907521  |
| <i>Artocarpus sericicarpus</i><br>F.M.Jarrett                                     | Artocarpeae | Zerega & al. 771      | Malaysia (Borneo)    | 2013 | F, SAN    | Artocarpus_sericicarp<br>us              | 5 | SRR3907288  |
| <i>Artocarpus styracifolius</i><br>Pierre                                         | Artocarpeae | Gardner & al. 176     | China (Hong Kong)    | 2016 | F, HK     | Artocarpus_styracifoli<br>us             | 5 | SRR12283038 |
| <i>Artocarpus subrotundifolius</i><br>Elmer                                       | Artocarpeae | Wenzel 1576           | Philippines          | 1915 | F         | Artocarpus_subrotundi<br>folius          | 5 | SRR12282887 |
| <i>Artocarpus sumatranus</i><br>Jarrett                                           | Artocarpeae | Ambriansyah<br>AA2766 | Sumatra              | 2004 | L         | Artocarpus_sumatranu<br>s                | 5 | SRR12282886 |
| <i>Artocarpus tamaran</i><br>Becc.                                                | Artocarpeae | Gardner & al. 92      | Malaysia (Borneo)    | 2014 | F, SAN    | Artocarpus_tamaran                       | 5 | SRR3907480  |
| <i>Artocarpus teijsmannii</i><br>Miq.                                             | Artocarpeae | Zerega & al. 946      | Malaysia (Borneo)    | 2013 | F, SAN    | Artocarpus_teijsmanni<br>i               | 5 | SRR3907434  |
| <i>Artocarpus thailandicus</i><br>C.C.Berg                                        | Artocarpeae | Zerega & al. 402      | Thailand             | 2012 | CHIC      | Artocarpus_thailandic<br>us              | 5 | SRR3907065  |
| <i>Artocarpus tomentosulus</i><br>F.M.Jarrett                                     | Artocarpeae | Zerega & al. 617      | Malaysia (Borneo)    | 2013 | F, SAN    | Artocarpus_tomentosu<br>lus              | 5 | SRR12283060 |
| <i>Artocarpus tonkinensis</i><br>Chev. ex. Gagnep.                                | Artocarpeae | Gardner & al. 174     | China (Hong Kong)    | 2016 | F, HK     | Artocarpus_tonkinensi<br>s               | 5 | SRR12283037 |
| <i>Artocarpus treculianus</i><br>Elmer                                            | Artocarpeae | Elmer 12468           | Philippines          | 1910 | US        | Artocarpus_treculianu<br>s               | 5 | SRR12282985 |
| <i>Artocarpus treculianus</i><br>Elmer ( <i>A. nigrescens</i><br>Elmer)           | Artocarpeae | Ramos BS-34736        | Philippines          | 1919 | US        | Artocarpus_nigrescens                    | 5 | SRR12282995 |
| <i>Artocarpus vrieseanus</i><br>Miq. var. <i>refractus</i><br>(Becc.) F.M.Jarrett | Artocarpeae | Hoogland 4822         | Papua New Guinea     | 1954 | L         | Artocarpus_vrieseanus<br>_var_refractus  | 5 | SRR12282981 |
| <i>Artocarpus vriesianus</i><br>Miq. var. <i>vrieseanus</i>                       | Artocarpeae | Weiblen & al.<br>1229 | Papua New Guinea     | 2000 | MIN       | Artocarpus_vrieseanus<br>_var_vrieseanus | 5 | SRR12283057 |
| <i>Artocarpus xanthocarpus</i><br>Merr.                                           | Artocarpeae | Yang 15648            | Taiwan (cult.)       | 2003 | MO        | Artocarpus_xanthocar<br>pus              | 5 | SRR12283033 |

|                                                                                                                   |                         |                                                          |                        |      | ATREE   |                                                         |   |             |
|-------------------------------------------------------------------------------------------------------------------|-------------------------|----------------------------------------------------------|------------------------|------|---------|---------------------------------------------------------|---|-------------|
|                                                                                                                   |                         |                                                          |                        |      | (photo  |                                                         |   |             |
|                                                                                                                   |                         |                                                          |                        |      | voucher |                                                         |   |             |
|                                                                                                                   |                         |                                                          |                        |      | CHIC)   |                                                         |   |             |
| <i>Artocarpus zeylanicus</i><br>(F.M.Jarrett)<br>E.M.Gardner & Zerega                                             | Artocarpeae             | Zerega & al. 956<br>Weiblen & al.                        | India                  | 2013 |         | Artocarpus_zeylanicus                                   | 5 | SRR12283117 |
| <i>Bagassa guianensis</i> Aubl.                                                                                   | Moreae                  | 1677                                                     | French Guiana          | 2000 | MIN     | Bagassa_guianensis                                      | 7 | SRR12283114 |
| <i>Batocarpus amazonicus</i><br>(Ducke) Fosberg                                                                   | Artocarpeae             | Salidas 1233                                             | Bolivia                | 1990 | F       | Batocarpus_amazonicus                                   | 5 | SRR12283113 |
| <i>Batocarpus costaricensis</i><br>Standley & L. O.<br>Williams                                                   | Artocarpeae             | Weiblen & al.<br>1463                                    | Costa Rica             | 2000 | MIN     | Batocarpus_costaricensis                                | 5 | SRR12283111 |
| <i>Batocarpus orinocensis</i><br>H.Karst.                                                                         | Artocarpeae             | Vasquez 27440                                            | Peru                   | 2001 | F       | Batocarpus_orinocensis                                  | 5 | SRR12283110 |
| <i>Bleekrodea</i><br><i>madagascariensis</i>                                                                      | Dorstenieae             | MYA 375(P)                                               |                        | 2009 |         | Bleekrodea_madagascariensis                             | 8 |             |
| <i>Boehmeria nivea</i> (L.)<br>Gaudich.                                                                           | Outgroup:<br>Urticaceae | Hu S.Y. 8113<br>J.R. Timberlake, T. Müller & F. Crawford | <i>Boehmeria nivea</i> | K    |         | 2                                                       | 2 | ERS4414210  |
| <i>Bosqueiopsis gillettii</i><br><i>Brosimum acutifolium</i><br>Huber subsp. <i>obovatum</i><br>(Ducke) C.C. Berg | Dorstenieae             | 5767(P)                                                  |                        | 2009 |         | <i>Bosqueiopsis gillettii</i>                           | 3 | SRR13188663 |
| <i>Brosimum alicastrum</i><br>subsp. <i>alicastrum</i>                                                            | Dorstenieae             | Killeen 4457                                             | Bolivia                | 1992 | F       | <i>Brosimum acutifolium</i>                             | 3 | SRR12282976 |
| <i>Brosimum alicastrum</i><br>subsp. <i>bolivarense</i>                                                           | Dorstenieae             | Gardner 23                                               | USA, Florida (Cult.)   | 2013 | CHIC    | <i>Brosimum alicastrum</i>                              | 3 | SRR12283030 |
| <i>Brosimum amazonicum</i>                                                                                        | Dorstenieae             | G.P. Cooper 441                                          | Panama                 | 1905 | F       | <i>Brosimum alicastrum</i><br>subsp. <i>bolivarense</i> | 3 | SRR12282975 |
| <i>Brosimum costaricanum</i>                                                                                      | Dorstenieae             | G. Weiblen 1522                                          | Brazil                 | 2002 | F       | <i>Brosimum amazonicum</i>                              | 3 | SRR13089487 |
| <i>Brosimum gaudichaudii</i>                                                                                      | Dorstenieae             | C. Kernan 27                                             | Costa Rica             | 1988 | F       | <i>Brosimum costaricanum</i>                            | 3 | SRR12282973 |
| <i>Brosimum glaucum</i>                                                                                           | Dorstenieae             | Mendes & al. 332                                         | Brazil                 | 2002 | F       | <i>Brosimum gaudichaudii</i>                            | 3 | SRR12283029 |
| <i>Brosimum guianense</i>                                                                                         | Dorstenieae             | Mori & al. 13882<br>Morales & Ureña                      | Brazil                 | 1981 | NY      | <i>Brosimum glaucum</i>                                 | 3 | SRR12282977 |
| <i>Brosimum lactescens</i>                                                                                        | Dorstenieae             | 5258                                                     | Costa Rica             | 1996 | F       | <i>Brosimum guianense</i>                               | 3 | SRR12282972 |
| <i>Brosimum longifolium</i>                                                                                       | Dorstenieae             | Moya & al. 138<br>Vasquez et al.                         | Bolivia                | 2008 | MO      | <i>Brosimum lactescens</i>                              | 3 | SRR13089488 |
| <i>Brosimum multinervium</i><br>C.C. Berg                                                                         | Dorstenieae             | 4044<br>Vasquez &<br>Chavez 25075                        | Peru                   | 1987 | F       | <i>Brosimum longifolium</i>                             | 3 | SRR12282970 |
| <i>Brosimum oligandrum</i>                                                                                        | Dorstenieae             | W. Han 3649                                              | French Guiana          | 1989 | F       | <i>Brosimum multinervium</i>                            | 3 | SRR12282969 |
|                                                                                                                   |                         |                                                          |                        |      |         | <i>Brosimum oligandrum</i>                              | 3 | SRR12282963 |

|                                                                         |                      |                                             |                 |      |           |                                      |            |             |
|-------------------------------------------------------------------------|----------------------|---------------------------------------------|-----------------|------|-----------|--------------------------------------|------------|-------------|
| <i>Brosimum parinarioides</i> subsp. <i>ampticoma</i> (Ducke) C.C. Berg | Dorstenieae          | Vasquez & Jaramillo 3817 Maciel & Rosario   | Peru            | 1983 | F         | <i>Brosimum_parinarioides</i>        | 3          | SRR12282967 |
| <i>Brosimum potabile</i> Ducke                                          | Dorstenieae          | 1552                                        | Brazil          | 1989 | F         | <i>Brosimum_potabile</i>             | 3          | SRR12282966 |
| <i>Brosimum rubescens</i>                                               | Dorstenieae          | McPherson 20944 Prance & al. P              | Panama          | 2009 | F         | <i>Brosimum_rubescens</i>            | 3          | SRR12282965 |
| <i>Brosimum sprucei</i>                                                 | Dorstenieae          | 25416                                       | Brazil          | 1977 | F         | <i>Brosimum_sprucei</i>              | 3          | SRR12282964 |
| <i>Brosimum utile</i>                                                   | Dorstenieae          | Galdames 4403                               | Panama          | 2000 | F         | <i>Brosimum_utile</i>                | 3          | SRR12283028 |
| <i>Broussonetia greveana</i>                                            | Dorstenieae          | O. Pascal and F. Hallé 677 (NY)             |                 |      |           | <i>Broussonetia_greveana</i>         | 8          |             |
| <i>Broussonetia kazinoki</i> Siebold                                    | Dorstenieae          | Chase 17827                                 |                 |      | K         | <i>Broussonetia_kazinoki</i>         | 8          |             |
| <i>Broussonetia kurzii</i>                                              | Dorstenieae          | Al Gentry and Chawalit Niyomdham 66546 (MO) |                 |      |           | <i>Broussonetia_kurzii</i>           | 8          |             |
| <i>Broussonetia papyrifera</i>                                          | Dorstenieae          | none                                        | Zhejiang, China |      |           | <i>Broussonetia_papyrifera</i>       | 9          | SRR11873442 |
| <i>Castilla elastica</i> Cerv.                                          | Olmedieae            | Chase 19850 Rodríguez González, Alexánder   |                 |      | K         | <i>Castilla_elastica_Chase19850</i>  | 2          | ERS4414204  |
| <i>Castilla tunu</i> Hemsl.                                             | Olmedieae            | Francisco 13002                             | Costa Rica      | 2010 | MO        | <i>Castilla_tunu_Rodriguez_13002</i> | this study | SRR24706426 |
| <i>Castilla ulei</i>                                                    | Olmedieae            | F_2312790                                   |                 |      | F 2312790 | <i>Castilla_ulei_F_2312790</i>       | this study | SRR24706343 |
| <i>Cecropia ficifolia</i> Warb. ex Sneathl.                             | Outgroup: Urticaceae | Berg & al. 18418                            | Brazil          | 1973 | K         | <i>Cecropia_ficifolia</i>            | 2          | ERS4414209  |
| <i>Clarisia biflora</i> Ruiz & Pav.                                     | Artocarpeae          | Weiblen & al. 1460                          |                 | 2000 |           | <i>Clarisia_biflora</i>              | 5          | SRR12283032 |
| <i>Clarisia ilicifolia</i> (Spereng.) Lanj. & Rossbach                  | Artocarpeae          | Souza 2492                                  | Brazil          |      | F         | <i>Clarisia_ilicifolia</i>           | 2          | SRR12283012 |
| <i>Clarisia racemosa</i> Ruiz & Pav.                                    | Artocarpeae          | Assunção 690                                | Brazil          | 1997 | F         | <i>Clarisia_racemosa</i>             | 5          | SRR12283109 |
| <i>Dorstenia africana</i>                                               | Dorstenieae          | Carvalho 5308(NY)                           |                 | 1993 |           | <i>Dorstenia_africana</i>            | 8          |             |
| <i>Dorstenia alta</i>                                                   | Dorstenieae          | A Ntemi Sallu 638(MO)                       |                 | 2001 |           | <i>Dorstenia_alta</i>                | 8          |             |
| <i>Dorstenia angusticornis</i>                                          | Dorstenieae          | BO Daramola 665(MO)                         |                 | 1995 |           | <i>Dorstenia_angusticornis</i>       | 8          |             |
| <i>Dorstenia appendiculata</i>                                          | Dorstenieae          | Andre MA Amorim et al. 1941(NY)             |                 | 1996 |           | <i>Dorstenia_appendiculata</i>       | 8          |             |
| <i>Dorstenia astyanactis</i>                                            | Dorstenieae          | Haba, P.K. 677(P)                           |                 | 2010 |           | <i>Dorstenia_astyanactis</i>         | 8          |             |
| <i>Dorstenia bahiensis</i>                                              | Dorstenieae          | H174(P)                                     |                 | 1993 |           | <i>Dorstenia_bahiensis</i>           | 8          |             |

|                                |             |                                     |      |                                |   |             |
|--------------------------------|-------------|-------------------------------------|------|--------------------------------|---|-------------|
| <i>Dorstenia barnimiana</i>    | Dorstenieae | J Lavranos & MB Bleck 19480(MO)     | 1981 | <i>Dorstenia_barnimiana</i>    | 8 |             |
| <i>Dorstenia benguellensis</i> | Dorstenieae | AS Mkeya et al 1109(MO)             | 1998 | <i>Dorstenia_benguellensis</i> | 8 |             |
| <i>Dorstenia bonijesu</i>      | Dorstenieae | V.F. Ferreirov 1729(P)              | 1981 | <i>Dorstenia_bonijesu</i>      | 8 |             |
| <i>Dorstenia brasiliensis</i>  | Dorstenieae | MJ Jansen-Jacobs et al 4436(NY)     | 1995 | <i>Dorstenia_brasiliensis</i>  | 8 |             |
| <i>Dorstenia brownii</i>       | Dorstenieae | MA Mwangoka et al 3606(MO)          | 2004 | <i>Dorstenia_brownii</i>       | 8 |             |
| <i>Dorstenia buchananii</i>    | Dorstenieae | NC Chase 5466(F)                    | 1954 | <i>Dorstenia_buchananii</i>    | 8 |             |
| <i>Dorstenia caimitensis</i>   | Dorstenieae | WJ Eyerdam(F)                       | 1927 | <i>Dorstenia_caimitensis</i>   | 8 |             |
| <i>Dorstenia carautae</i>      | Dorstenieae | JM Silva 782(MO)                    | 1990 | <i>Dorstenia_carautae</i>      | 8 |             |
| <i>Dorstenia cayapia</i> subsp |             |                                     |      | <i>Dorstenia_cayapia_ssp</i>   |   |             |
| <i>cayapia</i>                 | Dorstenieae | Andre Ma Carvalho et al 6710(NY)    | 1999 | <i>_Cayapia</i>                | 8 |             |
| <i>Dorstenia cayapia</i> subsp |             |                                     |      | <i>Dorstenia_cayapia_ssp</i>   |   |             |
| <i>vitifolia</i>               | Dorstenieae | Roberto Fontes Vieira et al 554(NY) | 1990 | <i>_vitifolia</i>              | 8 |             |
| <i>Dorstenia ciliata</i>       | Dorstenieae | X.M. van der Burgt 576(P)           | 2000 | <i>Dorstenia_ciliata</i>       | 8 |             |
| <i>Dorstenia contrajerva</i>   | Dorstenieae | Ulises Chavarria 809(F)             | 193  | <i>Dorstenia_contrajerva</i>   | 8 |             |
| <i>Dorstenia djettii</i>       | Dorstenieae | J Amponsah et al 1413(MO)           | 1996 | <i>Dorstenia_djettii</i>       | 8 |             |
| <i>Dorstenia drakeana</i>      | Dorstenieae | SD Koch et al 87195(NY)             | 1987 | <i>Dorstenia_drakeana</i>      | 8 |             |
| <i>Dorstenia elliptica</i>     | Dorstenieae | J. Nning 20(MO)                     | 1997 | <i>Dorstenia_elliptica</i>     | 8 |             |
| <i>Dorstenia erythrandra</i>   | Dorstenieae | WJ Eyerdam 298(F)                   | 1927 | <i>Dorstenia_erythrandra</i>   | 8 |             |
| <i>Dorstenia excentrica</i>    | Dorstenieae | M Nee 22374(F)                      | 1981 | <i>Dorstenia_excentrica</i>    | 8 |             |
| <i>Dorstenia fawcetti</i>      | Dorstenieae | CC Berg 990(NY)                     | 1980 | <i>Dorstenia_fawcetti</i>      | 8 |             |
| <i>Dorstenia flagellifera</i>  | Dorstenieae | W.J. Eyerdam 196(F)                 | 1927 | <i>Dorstenia_flagellifera</i>  | 8 |             |
| <i>Dorstenia foetida</i>       | Dorstenieae | William Burger 2844(F)              | 1963 | <i>Dorstenia_foetida</i>       | 3 | SRR13188662 |
| <i>Dorstenia goetzei</i>       | Dorstenieae | PB Phillipson 4801(MO)              | 1997 | <i>Dorstenia_goetzei</i>       | 8 |             |
| <i>Dorstenia hildebrandtii</i> |             |                                     |      | <i>Dorstenia_hildebrandtii</i> |   |             |
| var. <i>schlechteri</i>        | Dorstenieae | L Festo 648(MO)                     | 2000 | <i>i_var_schlechteri</i>       | 8 |             |
| <i>Dorstenia hirta</i>         | Dorstenieae | FO Souza et al 21(NY)               | 2000 | <i>Dorstenia_hirta</i>         | 8 |             |
| <i>Dorstenia holstii</i>       | Dorstenieae | A Ntemi Sallu 645(MO)               | 2000 | <i>Dorstenia_holstii</i>       | 8 |             |
| <i>Dorstenia indica</i>        | Dorstenieae | L Bernardi 16022(MO)                | 1975 | <i>Dorstenia_indica</i>        | 8 |             |
| <i>Dorstenia kameruniana</i>   | Dorstenieae | OA Kibure & H Bofu 1045(MO)         | 2003 | <i>Dorstenia_kameruniana</i>   | 8 |             |
| <i>Dorstenia lagoensis</i>     | Dorstenieae |                                     |      | <i>Dorstenia_lagoensis</i>     | 8 |             |
| <i>Dorstenia lindeniana</i>    | Dorstenieae | Gayle C Jone et al 3130(F)          | 1966 | <i>Dorstenia_lindeniana</i>    | 8 |             |

|                                   |             |                                                                         |      |                                   |   |
|-----------------------------------|-------------|-------------------------------------------------------------------------|------|-----------------------------------|---|
| <i>Dorstenia mannii</i>           | Dorstenieae | Simons, E.L.A.N. & R. Westerduijn<br>300(P)                             | 1999 | <i>Dorstenia mannii</i>           | 8 |
| <i>Dorstenia milaneziana</i>      | Dorstenieae | WW Thomas, A Amorin, J Jardim<br>11078(NY)                              | 1996 | <i>Dorstenia milaneziana</i>      | 8 |
| <i>Dorstenia morifolia</i>        | Dorstenieae |                                                                         |      | <i>Dorstenia morifolia</i>        | 8 |
| <i>Dorstenia oligogyna</i>        | Dorstenieae | J.J. Wieringa 3005(P)                                                   | 1994 | <i>Dorstenia oligogyna</i>        | 8 |
| <i>Dorstenia peruviana</i>        | Dorstenieae | A Fuentes 4353(MO)                                                      | 2002 | <i>Dorstenia peruviana</i>        | 8 |
| <i>Dorstenia petraea</i>          | Dorstenieae | Grady L Webster 4073(NY)                                                | 1951 | <i>Dorstenia petraea</i>          | 8 |
| <i>Dorstenia picta</i>            | Dorstenieae | RE Gereau et al. 5189(MO)                                               | 1993 | <i>Dorstenia picta</i>            | 8 |
| <i>Dorstenia poinsettiiifolia</i> | Dorstenieae | Simons, E.L.A.N. & R. Westerduijn<br>319(P)                             | 1999 | <i>Dorstenia poinsettiiifolia</i> | 8 |
| <i>Dorstenia psilurus</i>         | Dorstenieae | G.A. Zenker s.n.                                                        | 1911 | <i>Dorstenia psilurus</i>         | 8 |
| <i>Dorstenia ramosa</i> subsp.    |             |                                                                         |      | <i>Dorstenia ramosa</i> subsp.    |   |
| <i>Dolichocaula</i>               | Dorstenieae | M.D.M. Vianna Filho 2020(F)                                             | s.d. | <i>Dolichocaula</i>               | 8 |
| <i>Dorstenia roigii</i>           | Dorstenieae | Ekman 17973(F)                                                          | 1923 | <i>Dorstenia roigii</i>           | 8 |
| <i>Dorstenia soerensenii</i>      | Dorstenieae | WJJO de Wilde 9392(MO)                                                  | 1965 | <i>Dorstenia soerensenii</i>      | 8 |
| <i>Dorstenia strangii</i>         | Dorstenieae |                                                                         |      | <i>Dorstenia strangii</i>         | 8 |
| <i>Dorstenia tayloriana</i> var.  |             |                                                                         |      | <i>Dorstenia tayloriana</i> var.  |   |
| <i>tayloriana</i>                 | Dorstenieae | MA Mwangoka & A Kalage 2673(MO)                                         | 2002 | <i>tayloriana</i>                 | 8 |
| <i>Dorstenia tenera</i>           | Dorstenieae | F.J. Breteler 9984(P)                                                   | 1990 | <i>Dorstenia tenera</i>           | 8 |
| <i>Dorstenia tentaculata</i>      | Dorstenieae |                                                                         |      | <i>Dorstenia tentaculata</i>      | 8 |
| <i>Dorstenia tenuis</i>           | Dorstenieae | S.G. Tressens, E. Cabral, S. Cáceres, M.<br>Urbani & C. Zamudio 2911(F) | 1984 | <i>Dorstenia tenuis</i>           | 8 |
| <i>Dorstenia tubicina</i>         | Dorstenieae |                                                                         |      | <i>Dorstenia tubicina</i>         | 8 |
| <i>Dorstenia turbinata</i>        | Dorstenieae | M Cheek 11086(MO)                                                       | 2002 | <i>Dorstenia turbinata</i>        | 8 |
| <i>Dorstenia turnerifolia</i>     | Dorstenieae |                                                                         |      | <i>Dorstenia turnerifolia</i>     | 8 |
| <i>Dorstenia umbricola</i>        | Dorstenieae | M. Alexiades, V. Pasha(NY)                                              | 1989 | <i>Dorstenia umbricola</i>        | 8 |
| <i>Dorstenia urceolata</i>        | Dorstenieae | P.J.M. Maas & P. Carauta 3233(F)                                        | 1977 | <i>Dorstenia urceolata</i>        | 8 |
| <i>Dorstenia variifolia</i>       | Dorstenieae | J&J Lovett et al. 2135(MO)                                              | 1987 | <i>Dorstenia variifolia</i>       | 8 |
| <i>Dorstenia warneckeii</i>       | Dorstenieae | D.W. Thomas 3660(P)                                                     | 1984 | <i>Dorstenia warneckeii</i>       | 8 |
| <i>Dorstenia yambuyaensis</i>     | Dorstenieae | Mikio Kaji 24(P)                                                        | 1983 | <i>Dorstenia yambuyaensis</i>     | 8 |
| <i>Dorstenia zanzibarica</i>      | Dorstenieae | J Lovett 895(MO)                                                        | 1986 | <i>Dorstenia zanzibarica</i>      | 8 |
| <i>Elatostema retrohirtum</i>     | Outgroup:   |                                                                         |      | <i>Elatostema retrohirtum</i>     |   |
| <i>Dunn</i>                       | Urticaceae  | Monro & al 7601                                                         | K    | <i>Dunn</i>                       | 2 |

ERS4414235



|                                                    |                   |                                                       |                                                           |      |                           |                       |                                           |                                       |             |
|----------------------------------------------------|-------------------|-------------------------------------------------------|-----------------------------------------------------------|------|---------------------------|-----------------------|-------------------------------------------|---------------------------------------|-------------|
| <i>Fatoua pilosa</i> Gaudich                       | Dorstenieae       | Taylor 218                                            | Indonesia                                                 | 1981 |                           | K<br>(K00061825<br>2) | Fatoua_pilosa                             | 2                                     | ERS4414197  |
| <i>Fatoua villosa</i>                              | Dorstenieae       | E. Gardner 27 (CHIC)                                  |                                                           | 2013 |                           |                       | Fatoua_villosa                            | 3                                     | SRR13188661 |
| <i>Ficus abutilifolia</i> (Miq.)<br>Miq.           | GALOGLY<br>CHIA   | C. Baraloto 8050                                      | CF 36261                                                  |      | ICTB                      |                       | Ficus_abutilifolia_CB<br>8050             | This study                            | SRR24706213 |
| <i>Ficus adhatodifolia</i> Schott                  | PHARMAC<br>OSYCEA | S. Liao & al.<br>20180228                             | Cult. (HITBC) s.n.<br>Brazil                              | 2018 | HSNU                      |                       | Ficus_adhatodifolia_H<br>SNU20180228      | This study                            | SRR24706120 |
| <i>Ficus albert-smithii</i> Standl.                | AMERICA<br>NAE    | N. Rønsted 105                                        | Cult. (BG) 1989-519.<br>No. prov.                         | 2003 | K                         |                       | Ficus_albert-smithii_N_Ronsted_10<br>5    | This study                            | SRR24706403 |
| <i>Ficus albomaculata</i> C.C.Berg                 | SYCOCAR<br>PUS    | EG 855A                                               | Borneo, Sarawak                                           | 2020 | SAR, SING                 |                       | Ficus_albomaculata_E<br>G_855A            | This study                            | SRR24706392 |
| <i>Ficus albomaculata</i> C.C.Berg                 | SYCOCAR<br>PUS    | Othman et al.<br>S.61745                              | Borneo, Sarawak                                           | 1988 | L.1592179                 |                       | Ficus_albomaculata_L<br>1592179           | This study                            | SRR24706381 |
| <i>Ficus altissima</i> Blume                       | CONOSYC<br>EA     | unknown                                               | Cult. (Kunming<br>Institute of Botany)                    | 2020 |                           |                       | Ficus_altissima_SRR1<br>3576172           | NCBI<br>BioProject<br>PRJNA665<br>159 | SRR13576172 |
| <i>Ficus amadiensis</i> De<br>Wild.                | GALOGLY<br>CHIA   | Vollesen, & C.<br>Whitehouse 3517                     | Tanzania                                                  | 1997 | C,<br>C10503002           |                       | Ficus_amadiensis_C                        | This study                            | SRR24706370 |
| <i>Ficus americana</i> Aubl.                       | AMERICA<br>NAE    | N. Rønsted 154                                        | Cult. (BG) 1994-<br>0678. No. prov.                       | 2003 | BG                        |                       | Ficus_americana_Ron<br>sted_154           | This study                            | SRR24706359 |
| <i>Ficus ampana</i> C.C.Berg                       | MADAGA<br>SCAR    | Razafimandimbison,<br>Sylvain<br>Georges 1309         | Madagascar                                                | 2016 | MO                        |                       | Ficus_ampana_Razafi<br>mandimbison_1309   | This study                            | SRR24706348 |
| <i>Ficus ampelos</i> Burm.f.                       | ASPERAE           | R.D. Harrison<br>615                                  | Philippines, Palanan<br>Forest Dynamics<br>Plot, NE Luzon | 2004 | PUH/MIN                   |                       | Ficus_ampelas_R_Har<br>rison_615          | This study                            | SRR24706234 |
| <i>Ficus androchaete</i> Corner                    | ERIOSYCE<br>A     | Rantai Jawa and<br>Lai Shak Teck<br>S.74172           | Borneo, Sarawak                                           | 1996 | L.1593813                 |                       | Ficus_androchaete_L1<br>593813            | This study                            | SRR24706223 |
| <i>Ficus anserina</i> (Corner)<br>C.C.Berg         | SYNOECI<br>A      | Zhen Zhang,<br>Xiao-Mei Wang,<br>Hai-Yan Gao,<br>JHH2 | China, Yunnan,<br>Xishuangbanna,<br>Jinghong              | 2015 | HSNU                      |                       | Ficus_anserina_JHH2                       | This study                            | SRR24706342 |
| <i>Ficus antandronarum</i> (H.Perrier)<br>C.C.Berg | MADAGA<br>SCAR    | Antilahimena,<br>Patrice 8099                         | Madagascar                                                | 2012 | MO                        |                       | Ficus_antandronarum_<br>Antilahimena_8099 | This study                            | SRR24706331 |
| <i>Ficus apiocarpa</i> (Miq.)<br>Miq.              | SYNOECI<br>A      | B. Chanterasuwan<br>s.n.                              | Thailand                                                  | 2005 | No voucher<br>information |                       | Ficus_apiocarpa_Chan<br>terasuwan_sn      | This study                            | SRR24706320 |

|                                       |                    |                                      |                                                                       |      |             |                                       |                                         |             |
|---------------------------------------|--------------------|--------------------------------------|-----------------------------------------------------------------------|------|-------------|---------------------------------------|-----------------------------------------|-------------|
| <i>Ficus apiocarpa</i> (Miq.)<br>Miq. | SYNOECI<br>A       | EG 917                               | Borneo, Sarawak                                                       | 2020 | SAR, SING   | Ficus_apiocarpa_EG_917                | This study                              | SRR24706309 |
| <i>Ficus apiocarpa</i> (Miq.)<br>Miq. | SYNOECI<br>A       | SING2010_746                         | Singapore                                                             |      | SING        | Ficus_apiocarpa_SING2010_746          | This study                              | SRR24706298 |
| <i>Ficus apollinaris</i> Dugand       | OSYCEA             | A Espinosa 725                       | Panama                                                                | 1997 | F           | Ficus_apollinaris_Espinosa_725        | This study                              | SRR24706287 |
| <i>Ficus archboldiana</i> Summerh.    | CONOSYC<br>EA      | G.D. Weiblen<br>1695                 | Papua New Guinea,<br>Madang Province                                  | 2003 | MIN         | Ficus_cf_archboldiana_GD_Weiblen_1695 | This study                              | SRR24706149 |
| <i>Ficus asperifolia</i> Miq.         | ASPERAE<br>OREOSYC | N. Rønsted 217<br>McPherson,         | Cameroon                                                              | 2004 | K           | Ficus_asperifolia_N_Ronsted_217       | This study                              | SRR24706276 |
| <i>Ficus asperula</i> Bureau          | EA                 | Gordon D. 19193                      | New Caledonia                                                         | 2003 | MO          | Ficus_asperula_McPherson_19193        | This study                              | SRR24706265 |
| <i>Ficus assimilis</i> Baker          | ALBIPILA<br>E      | Onjalalaina, Guy<br>E. 25            | Madagascar                                                            | 2013 | MO          | Ficus_assimilis_Onjalalaina_25        | This study                              | SRR24706179 |
| <i>Ficus aurata</i> (Miq.) Miq.       | ERIOSYCE<br>A      | EG 845                               | Borneo, Sarawak                                                       | 2020 | SAR, SING   | Ficus_aurata_EG_845                   | This study                              | SRR24706168 |
| <i>Ficus aurata</i> (Miq.) Miq.       | ERIOSYCE<br>A      | EG 895                               | Borneo, Sarawak                                                       | 2020 | SAR, SING   | Ficus_aurata_EG_895                   | This study                              | SRR24706211 |
| <i>Ficus aurata</i> (Miq.) Miq.       | ERIOSYCE<br>A      | Liao S. & al.<br>20190347            | Borneo, Sabah                                                         | 2019 | SAN         | Ficus_aurata_Liao_20190347            | This study                              | SRR24706200 |
| <i>Ficus aurea</i> Nutt.              | AMERICA<br>NAE     | N. Rønsted 130                       | Cult. (BG) 89-538.<br>No prov.                                        | 2003 | K           | Ficus_aurea_N_Ronsted_130             | This study                              | SRR24706189 |
| <i>Ficus aurea</i> Nutt.              | AMERICA<br>NAE     | V0000018                             | Cult. (XTBG)                                                          |      | HITBC       | Ficus_aurea_SRR13279559               | 10<br>NCBI<br>BioProject<br>PRJNA694366 | SRR13279559 |
| <i>Ficus auriculata</i> Lour.         | SYCOMOR<br>US      | unknown                              | Kunming, China                                                        |      |             | Ficus_auriculata_SRR13570498          |                                         | SRR13570498 |
| <i>Ficus aurita</i> Blume             | PALEOMO<br>RPHE    | Runi et al.<br>S.62048               | Borneo, Sarawak                                                       | 1992 | L.1605165   | Ficus_aurita_L1605165                 | This study                              | SRR24706127 |
| <i>Ficus austrina</i> Corner          | ADENOSP<br>ERMA    | M. Køie &<br>Sanderman Olsen<br>1765 | New Guinea<br>Cult. (Montgomery Botanical<br>Center, MBC.4), Florida, | 1962 | C, 10503005 | Ficus_austrina_Koie1765               | This study                              | SRR24706126 |
| <i>Ficus austrocaledonica</i> Bureau  | OREOSYC<br>EA      | C. Baraloto 8080                     | USA                                                                   |      | ICTB        | Ficus_austrocaledonica_CB8080         | This study                              | SRR24706125 |
| <i>Ficus balete</i> Merr.             | CONOSYC<br>EA      | Elmer 18266                          | Philippines, Luzon,<br>Bataan                                         | 1917 | F_735639    | Ficus_balete_Elmer18266               | This study                              | SRR24706124 |
| <i>Ficus barba-jovis</i> Corner       | SYNOECI<br>A       | Liao S. & al.<br>20190451            | Borneo, Sabah                                                         | 2019 | SAN         | Ficus_barba-jovis_Liao_20190451       | This study                              | SRR24706123 |
| <i>Ficus barteri</i> Sprague          | GALOGLY<br>CHIA    | Walters, Gretchen<br>Marie 668       | Gabon                                                                 | 2001 | MO          | Ficus_barteri_Walters_668             | This study                              | SRR24706122 |
| <i>Ficus beccarii</i> King            | SYCOCAR<br>PUS     | EG 871A                              | Borneo, Sarawak                                                       | 2020 | SAR, SING   | Ficus_beccarii_EG_871A                | This study                              | SRR24706121 |

|                                                |                 |                                             |                                                            |      |           |                                        |            |             |
|------------------------------------------------|-----------------|---------------------------------------------|------------------------------------------------------------|------|-----------|----------------------------------------|------------|-------------|
| <i>Ficus beccarii</i> King                     | SYCOCAR<br>PUS  | EG 889                                      | Borneo, Sarawak                                            | 2020 | SAR, SING | Ficus_beccarii_EG_889                  | This study | SRR24706119 |
| <i>Ficus beccarii</i> King                     | SYCOCAR<br>PUS  | Liao S. & al.<br>20190385                   | Borneo, Sabah                                              | 2019 | SAN       | Ficus_beccarii_Liao_20190385           | This study | SRR24706118 |
| <i>Ficus benjamina</i> L.                      | CONOSYC<br>EA   | Othman et al.<br>S.41467                    | Borneo, Sarawak                                            | 1979 | L.1594269 | Ficus_benjamina_L1594269               | This study | SRR24706117 |
| <i>Ficus benjamina</i> L.                      | CONOSYC<br>EA   | Niissalo<br>SING2019_1181                   | Singapore                                                  | 2019 | SING      | Ficus_benjamina_SING2019_1181          | This study | SRR24706116 |
| <i>Ficus boliviana</i> C.C.Berg                | AMERICA<br>NAE  | Fuentes Claros,<br>Alfredo Fernando<br>4335 | Bolivia                                                    | 2002 | MO        | Ficus_boliviana_Fuentes_4335           | This study | SRR24706115 |
| <i>Ficus botryocarpa</i> Miq.                  | SYCOCAR<br>PUS  | R.D. Harrison<br>616                        | Philippines, Palanan<br>Forest Dynamics<br>Plot, NE Luzon  | 2004 | PUH/MIN   | Ficus_botryocarpa_Harrison_616         | This study | SRR24706114 |
| <i>Ficus brachyclada</i> Baker                 | ASPERAE         | Charles 3796                                | Madagascar                                                 | 2007 | MO        | Ficus_brachyclada_Rakotovoao_3796      | This study | SRR24706113 |
| <i>Ficus brachypoda</i> (Miq.)<br>Miq.         | MALVANT<br>HERA | D. Dixon and<br>Kerrigan 1101               | Australia, Northern<br>Territory                           | 2004 | DNA       | Ficus_brachypoda_Dixon_1101            | This study | SRR24706112 |
| <i>Ficus bracteata</i> (Miq.)<br>Wall. ex Miq. | CONOSYC<br>EA   | Julaihi S.81273                             | Borneo, Sarawak<br>Cult. (BG) 1989-522.                    | 1999 | L.1596389 | Ficus_bracteata_L1596389               | This study | SRR24706111 |
| <i>Ficus broadwayi</i> Urb.                    | AMERICA<br>NAE  | N. Rønsted 121                              | Orig. acc. Utrecht<br>Bot. Gard.                           | 2003 | K         | Ficus_broadwayi_N_Rønsted_121          | This study | SRR24706110 |
| <i>Ficus bruneiensis</i> Corner                | ERIOSYCE<br>A   | EG 879                                      | Borneo, Sarawak                                            | 2020 | SAR, SING | Ficus_bruneiensis_EG_879               | This study | SRR24706108 |
| <i>Ficus bruneiensis</i> Corner                | ERIOSYCE<br>A   | EG 822                                      | Borneo, Sarawak                                            | 2020 | SAR, SING | Ficus_bruneiensis_EG_822               | This study | SRR24706107 |
| <i>Ficus brunneaurata</i> Corner               | ERIOSYCE<br>A   | Ali et al. S.66721                          | Borneo, Sarawak                                            | 1993 | L.1596025 | Ficus_brunneaurata_L1596025            | This study | SRR24706106 |
| <i>Ficus brunneaurata</i> Corner               | ERIOSYCE<br>A   | Liao S. & al.<br>20190373                   | Borneo, Sabah                                              | 2019 | SAN       | Ficus_brunneaurata_Liao_20190373       | This study | SRR24706105 |
| <i>Ficus aff. bukitrayaensis</i>               | SYCOCAR<br>PUS  | EG 884                                      | Borneo, Sarawak                                            | 2020 | SAR, SING | Ficus_aff_bukitrayaensis_EG884         | This study | SRR24706109 |
| <i>Ficus aff. bukitrayaensis</i>               | SYCOCAR<br>PUS  | Liao S. & al.<br>20190443                   | Borneo, Sabah                                              | 2019 | SAN       | Ficus_aff_bukitrayaensis_Liao_20190443 | This study | SRR24706154 |
| <i>Ficus caballina</i> Standl.                 | AMERICA<br>NAE  | N. Rønsted 101                              | Cult. (BG) 1992-<br>0922. Ecuador                          | 2003 | K         | Ficus_caballina_N_Rønsted_101          | This study | SRR24706104 |
| <i>Ficus calimana</i> Dugand                   | AMERICA<br>NAE  | N. Rønsted 108                              | Cult. (BG) 1989-540<br>. No. prov.<br>Philippines, Palanan | 2003 | K         | Ficus_calimana_N_Rønsted_108           | This study | SRR24706103 |
| <i>Ficus callophylla</i> Blume                 | CONOSYC<br>EA   | R.D. Harrison<br>601                        | Forest Dynamics<br>Plot, NE Luzon                          | 2004 | PUH/MIN   | Ficus_callophylla_RD_Harrison_601      | This study | SRR24706102 |
| <i>Ficus callosa</i> Willd.                    | OREOSYC<br>EA   | N. Rønsted 109                              | Cult. (BG) 1999-561.<br>Indonesia.                         |      | K         | Ficus_callosa_N_Rønsted_109            | This study | SRR24706157 |

|                                                         |                   |                                                                          |                                                                            |      |                        |  |  |  |  |  |  |                                          | NCBI<br>BioProject<br>PRJNA389<br>699 |             |
|---------------------------------------------------------|-------------------|--------------------------------------------------------------------------|----------------------------------------------------------------------------|------|------------------------|--|--|--|--|--|--|------------------------------------------|---------------------------------------|-------------|
| <i>Ficus carica</i> L.                                  | CARICEAE          | unknown                                                                  | Cult. (Pisa, Italy)                                                        |      |                        |  |  |  |  |  |  | Ficus_carica_SRR5678803                  |                                       | SRR5678803  |
| <i>Ficus carica</i> L.                                  | CARICEAE          | V000017                                                                  | Cult. (Kunming Institute of Botany)                                        |      | HITBC                  |  |  |  |  |  |  | Ficus_carica_SRR13279566                 | 10                                    | SRR13279566 |
| <i>Ficus carrii</i> Corner                              | SYNOECI<br>A      | 20190370<br>SAN160640                                                    | Borneo, Sabah                                                              | 2019 | SAN                    |  |  |  |  |  |  | Ficus_carrii_Liao_20190370               | This study                            | SRR24706156 |
| <i>Ficus casapiensis</i> (Miq.)<br>Miq.                 | AMERICA<br>NAE    | N. Rønsted 149<br>Liao S. & al.<br>20190477 or Liao<br>S. & al. 20190418 | Cult. (BG) 1998-0266. Orig. Peru, San Martin, Tarapoto-Yurimaguas.         | 2003 | K                      |  |  |  |  |  |  | Ficus_casapiensis_N_Ronsted_149          | This study                            | SRR24706155 |
| <i>Ficus caulocarpa</i> (Miq.)<br>Miq.                  | UROSTIG<br>MA     | R.D. Harrison<br>596                                                     | Borneo, Sabah<br>Philippines, Palanan<br>Forest Dynamics<br>Plot, NE Luzon | 2019 | HSNU, SAN              |  |  |  |  |  |  | Ficus_caulocarpa_Liao_20190477           | This study                            | SRR24706153 |
| <i>Ficus caulocarpa</i> (Miq.)<br>Miq.                  | UROSTIG<br>MA     | R.D. Harrison<br>596                                                     | Borneo, Sarawak                                                            | 2004 | PUH/MIN                |  |  |  |  |  |  | Ficus_caulocarpa_R_Harrison_596          | This study                            | SRR24706152 |
| <i>Ficus cereicarpa</i> Corner                          | SYCOCAR<br>PUS    | Ilias Paie S.41676                                                       | Borneo, Sarawak                                                            | 1981 | L.1600154              |  |  |  |  |  |  | Ficus_cereicarpa_L1600154                | This study                            | SRR24706151 |
| <i>Ficus cereicarpa</i> Corner                          | SYCOCAR<br>PUS    | Othman et al.<br>S.56433                                                 | Borneo, Sarawak                                                            | 1988 | L.1608918              |  |  |  |  |  |  | Ficus_cereicarpa_L1608918                | This study                            | SRR24706150 |
| <i>Ficus chapaensis</i> Gagnep.                         | FRUTESCE<br>NTIAE | N. Rønsted 301                                                           | Cult. (HITBC) s.n.                                                         | 2006 | HITBC                  |  |  |  |  |  |  | Ficus_chapaensis_N_Ronsted_301           | This study                            | SRR24706139 |
| <i>Ficus chartacea</i> (Wall. ex Kurz)<br>Wall. ex King | ERIOSYCE<br>A     | B. Chanterasawan                                                         | Thailand                                                                   | 2005 | No voucher information |  |  |  |  |  |  | Ficus_chartacea_Chanterasawan            | This study                            | SRR24706138 |
| <i>Ficus chartacea</i> (Wall. ex Kurz)<br>Wall. ex King | ERIOSYCE<br>A     | Niissalo<br>CTFS_G1_26058                                                | Singapore                                                                  |      | SING                   |  |  |  |  |  |  | Ficus_chartacea_CTF_S_G1_26058           | This study                            | SRR24706137 |
| <i>Ficus chartacea</i> (Wall. ex Kurz)<br>Wall. ex King | ERIOSYCE<br>A     | EG 894                                                                   | Borneo, Sarawak                                                            | 2020 | SAR, SING              |  |  |  |  |  |  | Ficus_chartacea_EG_894                   | This study                            | SRR24706136 |
| <i>Ficus citrifolia</i> Mill.                           | AMERICA<br>NAE    | N. Rønsted 104                                                           | Cult. (BG) 1993-1674. No prov.                                             | 2003 | K                      |  |  |  |  |  |  | Ficus_subandina_N_Ronsted_104            | This study                            | SRR24706284 |
| <i>Ficus coerulescens</i> (Rusby)<br>Rossberg           | AMERICA<br>NAE    | C. Baraloto 8043                                                         | CF 36240                                                                   |      | ICTB                   |  |  |  |  |  |  | Ficus_coerulescens_C8043                 | This study                            | SRR24706135 |
| <i>Ficus colubrinae</i> Standl.                         | AMERICA<br>NAE    | Stevens, Warren<br>Douglas 31913                                         | Nicaragua                                                                  | 2011 | MO                     |  |  |  |  |  |  | Ficus_colubrinae_Stevens_31913           | This study                            | SRR24706134 |
| <i>Ficus conocephalifolia</i> aff.                      | PHAEOPIL<br>OSAE  | McDonell &<br>Ismail 3708                                                | Indonesia, Papua, Sarini                                                   | 1993 | MO                     |  |  |  |  |  |  | Ficus_aff_conocephalifolia_McDonell_3708 | This study                            | SRR24706143 |
| <i>Ficus consociata</i> Blume                           | CONOSYC<br>EA     | Niissalo<br>SING2019_1180                                                | Singapore                                                                  | 2019 | SING                   |  |  |  |  |  |  | Ficus_consociata_SING2019_1180           | This study                            | SRR24706133 |
| <i>Ficus copiosa</i> Steud.                             | PHAEOPIL<br>OSAE  | G.D. Weiblen D8                                                          | Papua New Guinea,<br>Madang Province                                       | 1996 | A                      |  |  |  |  |  |  | Ficus_copiosa_Weiblen_D8                 | This study                            | SRR24706131 |

|                                                                      |                    |                                  |                                                          |      |           |                                              |                                       |             |
|----------------------------------------------------------------------|--------------------|----------------------------------|----------------------------------------------------------|------|-----------|----------------------------------------------|---------------------------------------|-------------|
| <i>Ficus cordatula</i> Merr.                                         | CONOSYC<br>EA      | Garcia et al. PPI<br>18439       | Philippines                                              | 1995 | L.1596217 | Ficus_cordatula_L159<br>6217                 | This study                            | SRR24706130 |
| <i>Ficus cordatula</i> Merr.                                         | CONOSYC<br>EA      | RD Harrison 606                  | Philippines                                              |      | PUH       | Ficus_cordatula_RD_<br>Harrison_606          | This study                            | SRR24706260 |
| <i>Ficus costaricana</i> (Liebm.)<br>Miq.                            | AMERICA<br>NAE     | C. Baraloto 8046                 | CF 36244                                                 |      | ICTB      | Ficus_costaricana_CB<br>8046                 | This study                            | SRR24706258 |
| <i>Ficus crassiramea</i> (Miq.)<br>Miq.                              | CONOSYC<br>EA      | Lee Meng Hock<br>S.40224         | Borneo, Sarawak                                          | 1979 | L.1596056 | Ficus_crassiramea_L1<br>596056               | This study                            | SRR24706257 |
| <i>Ficus crassiuscula</i> Warb.<br>ex Standl.                        | PHARMAC<br>OSYCEA  | M. Grayum 9097                   | Costa Rica                                               | 1988 | MO        | Ficus_crassiuscula_Gr<br>ayum_9097           | This study                            | SRR24706256 |
| <i>Ficus</i> cf.<br><i>crecentioides</i> Bureau                      | OREOSYC<br>EA      | McPherson,<br>Gordon D. 18134    | New Caledonia                                            | 2001 | MO        | Ficus_cf_crecentioides<br>_McPherson_18134   | This study                            | SRR24706148 |
| <i>Ficus crocata</i> (Miq.)<br>Mart. ex Miq.                         | AMERICA<br>NAE     | Stevens, Warren<br>Douglas 35898 | Nicaragua                                                | 2015 | MO        | Ficus_crocata_Stevens<br>_35898              | This study                            | SRR24706255 |
| <i>Ficus crocata</i> aff. (Miq.)<br>Mart. ex Miq.                    | AMERICA<br>NAE     | H.Q. Li 2011437                  | Cult. (NTU) C1-347.<br>No prov.                          | 2011 | HSNU      | Ficus_aff_crocata_HS<br>NU2011437            | This study                            | SRR24706132 |
| <i>Ficus cucurbitina</i> King                                        | CONOSYC<br>EA      | Ilias Paie S.25730               | Borneo, Sarawak                                          | 1967 | L.1596709 | Ficus_cucurbitina_L15<br>96709               | This study                            | SRR24706254 |
| <i>Ficus curtipes</i> Corner                                         | CONOSYC<br>EA      | unknown                          | Kunming, China (Cult.?)<br>Cult. (C) E1859-              |      |           | Ficus_curtipes_SRR13<br>570496               | NCBI<br>BioProject<br>PRJNA694<br>366 | SRR13570496 |
| <i>Ficus cyathistipula</i> Warb.                                     | GALOGLY<br>CHIA    | N. Rønsted 80                    | 0023. No prov.                                           | 2002 | C         | Ficus_cyathistipula_R<br>onsted_80           | This study                            | SRR24706253 |
| <i>Ficus cyathistipula</i> Warb.                                     | GALOGLY<br>CHIA    | Wang EEPAI 71                    | Cult. (XTBG)                                             |      | HITBC     | Ficus_cyathistipula_S<br>RR13279558          | 10                                    | SRR13279558 |
| <i>Ficus cyathistipuloides</i> De<br>Wild.                           | GALOGLY<br>CHIA    | N. Rønsted 136                   | Cult. (BG) 1988-239.<br>Orig. acc. Utrecht<br>Bot. Gard. | 2003 | K         | Ficus_cyathistipuloide<br>s_N_Ronsted_136    | This study                            | SRR24706252 |
| <i>Ficus cyrtophylla</i> (Miq.)<br>Miq.                              | ASPERAE<br>ADENOSP | V000006                          | Cult. (XTBG)                                             |      | HITBC     | Ficus_cyrtophylla_SR<br>R13279557            | 10                                    | SRR13279557 |
| <i>Ficus dammaropsis</i> Diels                                       | ERMA<br>FRUTESCE   | Regalado & Katik<br>1012         | Papua New Guinea,<br>Morobe                              | 1994 | F         | Ficus_dammaropsis_R<br>egalado_1012          | This study                            | SRR24706250 |
| <i>Ficus deltoidea</i> Jack                                          | NTIAE<br>FRUTESCE  | E. Gardner 539a                  | Borneo, Sarawak                                          | 2017 | SAR       | Ficus_deltoidea_E_Ga<br>rdner_539a           | This study                            | SRR24706249 |
| <i>Ficus deltoidea</i> Jack                                          | NTIAE              | EG 833                           | Borneo, Sarawak                                          | 2020 | SAR, SING | Ficus_deltoidea_EG_8<br>33                   | This study                            | SRR24706248 |
| <i>Ficus deltoidea</i> subsp.<br><i>motleyana</i> (Miq.)<br>C.C.Berg | FRUTESCE<br>NTIAE  | S.P. Runi & P.C.<br>Yii S.63044  | Borneo, Sarawak                                          | 1991 | L.1606437 | Ficus_deltoidea_subsp<br>_motleyana_L1606437 | This study                            | SRR24706247 |
| <i>Ficus densifolia</i> Miq.                                         | MA<br>GALOGLY      | J. Fournel 117                   | Mauritius                                                | 2006 | REU       | Ficus_densifolia_Four<br>nel_117             | This study                            | SRR24706246 |
| <i>Ficus densistipulata</i> De<br>Wild.                              | CHIA               | N. Rønsted 233                   | Cameroon                                                 | 2004 | K         | Ficus_densistipulata_<br>N_Ronsted_233       | This study                            | SRR24706245 |

|                                                 |                   |                                        |                                                                |      |                  |                                            |            |             |
|-------------------------------------------------|-------------------|----------------------------------------|----------------------------------------------------------------|------|------------------|--------------------------------------------|------------|-------------|
| <i>Ficus depressa</i> Blume                     | CONOSYC<br>EA     | Chai S.33249                           | Borneo, Sarawak                                                | 1973 | L.1606755        | <i>Ficus depressa</i> _L1606755            | This study | SRR24706244 |
| <i>Ficus destruens</i> F.Muell.<br>ex C.T.White | MALVANT<br>HERA   | C. Baraloto 8089<br>I. Friis, Z. Wolde | Cult. (Montgomery Botanical Center, MBC.13), Florida, USA      |      | ICTB             | <i>Ficus destruens</i> _CB8089             | This study | SRR24706243 |
| <i>Ficus dicranostyla</i> Mildbr.               | ALBIPILA<br>E     | & K. Vollesen<br>2501                  | Ethiopia                                                       | 1982 | C -<br>C10011624 | <i>Ficus dicranostyla</i> _Friis2501       | This study | SRR24706242 |
| <i>Ficus dinganensis</i><br>S.S.Chang           | SYNOECI<br>A      | Zhen Zhang,<br>DLP28                   | China, Hainan,<br>Linshui, Mt. Diaoluo                         | 2015 | HSNU             | <i>Ficus dinganensis</i> _DLP28            | This study | SRR24706241 |
| <i>Ficus drupacea</i> Thunb.                    | CONOSYC<br>EA     | N. Rønsted 114                         | Orig. acc Paradenya Bot. Gard.                                 | 2003 | K                | <i>Ficus drupacea</i> _N_Rønsted_114       | This study | SRR24706424 |
| <i>Ficus erecta</i> Thunb.                      | FRUTESCE<br>NTIAE | unknown                                | Japan(?)<br>Cult. (Montgomery Botanical Center MBC.11), Miami, |      | ICTB             | <i>Ficus erecta</i> _DRR203152             | 11         | DRR203152   |
| <i>Ficus erecta</i> var.<br><i>beecheyana</i>   | FRUTESCE<br>NTIAE | C. Baraloto 8087<br>Randrianaivo,      | Florida, USA.<br>São Tomé and                                  |      | ICTB             | <i>Ficus erecta</i> _var_beecheyana_CB8087 | This study | SRR24706423 |
| <i>Ficus exasperata</i> Vahl                    | ASPERAE           | Richard 1656<br>Liao S. & al.          | Príncipe                                                       | 2008 | MO               | <i>Ficus exasperata</i> _Randrianaivo_1656 | This study | SRR24706422 |
| <i>Ficus excavata</i> King                      | SYNOECI<br>A      | 20190333<br>SAN160605                  | Borneo, Sabah<br>Cult. (BG) 2000-1295. Orig.                   | 2019 | SAN              | <i>Ficus excavata</i> _Liao_20190333       | This study | SRR24706421 |
| <i>Ficus eximia</i> Schott                      | AMERICA<br>NAE    | N. Rønsted 146                         | Campinas, Sao Paulo, Brazil.<br>Philippines, Palanan           | 2003 | K                | <i>Ficus eximia</i> _N_Rønsted_146         | This study | SRR24706420 |
| <i>Ficus fiskei</i> Elmer                       | ASPERAE           | R.D. Harrison<br>613                   | Forest Dynamics Plot, NE Luzon                                 | 2004 | PUH/MIN          | <i>Ficus fiskei</i> _RD_Harrison_613       | This study | SRR24706419 |
| <i>Ficus fistulosa</i> Reinw. ex Blume          | SYCOCAR<br>PUS    | Niissalo<br>CTFS_A2_20261              | Singapore                                                      |      | SING             | <i>Ficus fistulosa</i> _CTFS_A2_20261      | This study | SRR24706418 |
| <i>Ficus fistulosa</i> Reinw. ex Blume          | SYCOCAR<br>PUS    | EG 900                                 | Borneo, Sarawak<br>Philippines, Palanan                        | 2020 | SAR, SING        | <i>Ficus fistulosa</i> _EG_900             | This study | SRR24706417 |
| <i>Ficus fistulosa</i> Reinw. ex Blume          | SYCOCAR<br>PUS    | R.D. Harrison<br>598                   | Forest Dynamics Plot, NE Luzon                                 | 2004 | PUH/MIN          | <i>Ficus fistulosa</i> _Harrison_598       | This study | SRR24706416 |
| <i>Ficus formosana</i> Maxim.                   | FRUTESCE<br>NTIAE | unknown                                | Guangzhou, China                                               |      |                  | <i>Ficus formosana</i> _SRR13972883        | 12         | SRR13972883 |
| <i>Ficus forstenii</i> Miq.                     | CONOSYC<br>EA     | R.D. Harrison<br>632                   | Philippines                                                    | 2004 | PUH              | <i>Ficus forstenii</i> _RD_Harrison_632    | This study | SRR24706415 |
| <i>Ficus francisci</i> H.J.P.Winkl.             | SYCOCAR<br>PUS    | EG 874                                 | Borneo, Sarawak                                                |      |                  | <i>Ficus francisci</i> _EG_874             | This study | SRR24706413 |

|                                                   |                              |                                         |                                                              |      |                  |                                               |            |             |
|---------------------------------------------------|------------------------------|-----------------------------------------|--------------------------------------------------------------|------|------------------|-----------------------------------------------|------------|-------------|
| <i>Ficus fulva</i> cf                             | ERIOSYCE<br>A                | Liao S. et al.<br>20190354<br>SAN160627 | Borneo, Sabah<br>Cult., Montgomery Botanical<br>Center MBC.6 | 2019 | SAN              | <i>Ficus_cf_fulva_Liao_</i><br>20190354       | This study | SRR24706146 |
| <i>Ficus fulva</i> cf.                            | ERIOSYCE<br>A                | C. Baraloto 8082                        |                                                              |      | ICTB             | <i>Ficus_cf_fulva_CB80</i><br>82              | This study | SRR24706147 |
| <i>Ficus fulva</i> cf.                            | ERIOSYCE<br>A                | EG 859<br>C.F. van<br>Beusekom et al.   | Borneo, Sarawak                                              | 2020 | SAR, SING        | <i>Ficus_fulva_EG_859</i>                     | This study | SRR24706410 |
| <i>Ficus fulva</i> Reinw. ex<br>Blume             | ERIOSYCE<br>A                | 8789                                    | Phrae, Thailand                                              | 1972 | C,<br>C10011625  | <i>Ficus_fulva_C100116</i><br>25              | This study | SRR24706412 |
| <i>Ficus fulva</i> Reinw. ex<br>Blume             | ERIOSYCE<br>A                | EG 810                                  | Borneo, Sarawak                                              | 2020 | SAR, SING        | <i>Ficus_fulva_EG_810</i>                     | This study | SRR24706411 |
| <i>Ficus fulva</i> Reinw. ex<br>Blume             | ERIOSYCE<br>A                | EG 885                                  | Borneo, Sarawak                                              | 2020 | SAR, SING        | <i>Ficus_fulva_EG_885</i>                     | This study | SRR24706409 |
| <i>Ficus gasparriniana</i> Miq.                   | FRUTESCE<br>NTIAE<br>CONOSYC | Xiao C240016                            | Cult. (XTBG)                                                 | 2006 | HITBC0021<br>807 | <i>Ficus_gasparriniana_S</i><br>RR13279556    | 10         | SRR13279556 |
| <i>Ficus glaberrima</i> Blume                     | EA                           | N. Rønsted 295                          | Cult. (HITBC) s.n.                                           | 2006 | HITBC            | <i>Ficus_glaberrima_N_</i><br>Ronsted_295     | This study | SRR24706408 |
| <i>Ficus glandifera</i> Summerh.                  | MALVANT<br>HERA              | JRAS01480                               | Vanuatu                                                      | 2000 | HSNU             | <i>Ficus_glandifera_JYR</i><br>_JRAS01480     | This study | SRR24706407 |
| <i>Ficus glandifera</i> Summerh.                  | MALVANT<br>HERA              | Corner NGF<br>12478                     | Papua New Guinea                                             |      | L.1589601        | <i>Ficus_glandifera_L15</i><br>89601          | This study | SRR24706406 |
| <i>Ficus glandulifera</i> (Wall.<br>ex Miq.) King | ERIOSYCE<br>A                | P. Chai S.33188                         | Borneo, Sarawak                                              | 1973 | L.1607671        | <i>Ficus_glandulifera_L1</i><br>607671        | This study | SRR24706405 |
| <i>Ficus glandulifera</i> (Wall.<br>ex Miq.) King | ERIOSYCE<br>A                | Niissalo<br>SING2010_054                | Singapore                                                    | 2010 | SING             | <i>Ficus_glandulifera_SI</i><br>NG2010_054    | This study | SRR24706404 |
| <i>Ficus globosa</i> Blume                        | CONOSYC<br>EA                | EG 834                                  | Borneo, Sarawak                                              |      | SAR, SING        | <i>Ficus_globosa_EG_83</i><br>4               | This study | SRR24706402 |
| <i>Ficus gommelleira</i> Kunth<br>& C.D.Bouché    | AMERICA<br>NAE               | N. Rønsted 153                          | Cult. (BG) 2000-<br>0832. Brazil                             | 2003 | K                | <i>Ficus_gommelleira_N</i><br>_Ronsted_153    | This study | SRR24706401 |
| <i>Ficus grandiflora</i> Corner                   | SYNOECI<br>A                 | EG 826                                  | Borneo, Sarawak                                              | 2020 | SAR, SING        | <i>Ficus_cf_grandiflora_</i><br>EG_826        | This study | SRR24706145 |
| <i>Ficus grossularioides</i> Burm.f.              | ERIOSYCE<br>A                | EG 812                                  | Borneo, Sarawak                                              | 2020 | SAR, SING        | <i>Ficus_grossularioides_</i><br>EG_812       | This study | SRR24706400 |
| <i>Ficus grossularioides</i> Burm.f.              | ERIOSYCE<br>A                | EG 847                                  | Borneo, Sarawak                                              | 2020 | SAR, SING        | <i>Ficus_grossularioides_</i><br>EG_847       | This study | SRR24706399 |
| <i>Ficus grossularioides</i> Burm.f.              | ERIOSYCE<br>A                | Niissalo<br>SING2019_406                | Singapore                                                    | 2019 | SING             | <i>Ficus_grossularioides_</i><br>SING2019_406 | This study | SRR24706398 |
| <i>Ficus guianensis</i> Desv.                     | AMERICA<br>NAE               | G. Weiblen<br>GW1669                    | French Guiana                                                | 2002 | MIN              | <i>Ficus_guianensis_GW</i><br>1669            | This study | SRR24706397 |
| <i>Ficus guizhouensis</i><br>X.S.Zhang            | SYNOECI<br>A                 | Zhen Zhang, Li-<br>Fang Zhang,<br>RJP19 | China, Guizhou,<br>Qiandongnan,<br>Rongjiang                 | 2015 | HSNU             | <i>Ficus_guizhouensis_R</i><br>JP19           | This study | SRR24706396 |
| <i>Ficus hemsleyana</i> King                      | PALEOMO<br>RPHE              | P. Chai et al.<br>S.33215               | Borneo, Sarawak                                              | 1973 | L.1602112        | <i>Ficus_hemsleyana_L1</i><br>602112          | This study | SRR24706395 |

|                                     |                    |                                                                             |                                                                                                       |      |                  |                                       |                                                 |             |
|-------------------------------------|--------------------|-----------------------------------------------------------------------------|-------------------------------------------------------------------------------------------------------|------|------------------|---------------------------------------|-------------------------------------------------|-------------|
| <i>Ficus henryi</i> Warb. ex Diels  | SINOSYCI<br>DIUM   | N. Rønsted 289                                                              | Cult. (HITBC) s.n.                                                                                    | 2006 | HITBC            | Ficus_henryi_N_Ronsted_289            | This study                                      | SRR24706394 |
| <i>Ficus hesperidiiformis</i> King  | MALVANT<br>HERA    | G. Weiblen 2332                                                             | Papua New Guinea,<br>Madang Province                                                                  | 2005 | MIN              | Ficus_hesperidiiformis_G_Weiblen_2332 | This study<br>NCBI<br>BioProject<br>PRJNA694366 | SRR24706393 |
| <i>Ficus heteromorpha</i> Hemsl.    | FRUTESCE<br>NTIAE  | unknown                                                                     | Kunming, China                                                                                        |      |                  | Ficus_heteromorpha_SRR13570495        |                                                 | SRR13570495 |
| <i>Ficus heterophylla</i> L.f.      | ASPERAE<br>PALEOMO | N. Rønsted 302<br>Mohtar & Yii S.66227                                      | Cult. (HITBC) s.n.                                                                                    | 2006 | HITBC            | Ficus_heterophylla_N_Ronsted_302      | This study                                      | SRR24706391 |
| <i>Ficus heteropleura</i> Blume     | RPHE<br>PALEOMO    | Niissalo                                                                    | Borneo, Sarawak                                                                                       | 1992 | L.1602487        | Ficus_heteropleura_L1602487           | This study                                      | SRR24706390 |
| <i>Ficus heteropleura</i> Blume     | RPHE               | SING2020_799                                                                | Singapore                                                                                             | 2020 | SING             | Ficus_heteropleura_SING2020_799       | This study<br>NCBI<br>BioProject<br>PRJNA277898 | SRR24706389 |
| <i>Ficus hirta</i> Vahl             | ERIOSYCE<br>A      | unknown                                                                     | China                                                                                                 |      |                  | Ficus_hirta_SRR1909654                |                                                 | SRR1909654  |
| <i>Ficus hispida</i> L.f.           | SYCOCAR<br>PUS     | Wang EEPAI 14<br>Zhen Zhang,<br>Xiao-Mei Wang,<br>Hai-Yan Gao,<br>20150833a | Cult. (XTBG)                                                                                          | 2020 | HITBC<br>V000005 | Ficus_hispida_SRR13279575             | 10                                              | SRR13279575 |
| <i>Ficus howii</i> Merr. & Chun     | SYNOECI<br>A       | 20150833a                                                                   | China, Yunnan,<br>Wenshan, Malipo                                                                     | 2015 | HSNU<br>PE       | Ficus_howii_20150833a                 | This study                                      | SRR24706388 |
| <i>Ficus humbertii</i> C.C.Berg     | MADAGA<br>SCAR     | A.B.Ware & al. 9<br>P. Phillipson & al. 3726                                | Madagascar                                                                                            | 1992 | 01724670         | Ficus_humbertii_Liu20180291           | This study                                      | SRR24706387 |
| <i>Ficus humbertii</i> C.C.Berg     | MADAGA<br>SCAR     | Liao S. et al. 20190413                                                     | Madagascar, Toliara                                                                                   | 1990 | MO               | Ficus_humbertii_Phillipson_3726       | This study                                      | SRR24706386 |
| <i>Ficus inaequipetiolata</i> Merr. | ERIOSYCE<br>A      | SAN160583<br>Liao S. et al.                                                 | Borneo, Sabah                                                                                         | 2019 | SAN              | Ficus_inaequipetiolata_Liao_20190413  | This study                                      | SRR24706385 |
| <i>Ficus inaequipetiolata</i> Merr. | ERIOSYCE<br>A      | SAN160587                                                                   | Borneo, Sabah<br>Cult. (USDA Subtropical<br>Horticulture Research Station,<br>CF 36265), Florida, USA | 2019 | SAN              | Ficus_inaequipetiolata_Liao_20190417  | This study                                      | SRR24706384 |
| <i>Ficus ingens</i> (Miq.) Miq.     | UROSTIG<br>MA      | C. Baraloto 8051                                                            | Cult. (BG) 91-839.                                                                                    |      | ICTB             | Ficus_ingens_CB8051                   | This study                                      | SRR24706383 |
| <i>Ficus ingens</i> (Miq.) Miq.     | UROSTIG<br>MA      | N. Rønsted 106<br>Santamaria-<br>Aguilar, Daniel<br>Alberto 2914            | No prov.                                                                                              | 2003 | K                | Ficus_ingens_N_Ronsted_106            | This study                                      | SRR24706382 |
| <i>Ficus insipida</i> Willd.        | PHARMAC<br>OSYCEA  | Charoenphoi et al. 4149                                                     | Costa Rica                                                                                            | 2005 | MO<br>C,         | Ficus_insipida_SantamariaAguilar_2914 | This study                                      | SRR24706380 |
| <i>Ficus ischnopoda</i> Miq.        | FRUTESCE<br>NTIAE  |                                                                             | Yala, Thailand                                                                                        | 1970 | C10011626        | Ficus_ischnopoda_C10011626            | This study                                      | SRR24706379 |



|                                                  |               |                                     |                                                                         |      |           |                                              |                                                 |             |
|--------------------------------------------------|---------------|-------------------------------------|-------------------------------------------------------------------------|------|-----------|----------------------------------------------|-------------------------------------------------|-------------|
| <i>Ficus kerkhovenii</i> Koord. & Valetton       | CONOSYCEA     | Niissalo SING2019_1357              | Singapore                                                               | 2019 | SING      | <i>Ficus_kerkhovenii</i> _SING2019_1357      | This study                                      | SRR24706378 |
| <i>Ficus laevis</i> Blume                        | ERIOSYCEA     | Niissalo SING2019_489               | Singapore                                                               |      | SING      | <i>Ficus_laevis</i> _SING2019_489            | This study                                      | SRR24706377 |
| <i>Ficus lamponga</i> Miq.                       | ERIOSYCEA     | Niissalo CTFS_I5_28831              | Singapore                                                               |      | SING      | <i>Ficus_lamponga</i> _CTFS_I5_28831         | This study                                      | SRR24706376 |
| <i>Ficus lapathifolia</i> (Liebm.) Miq.          | PHARMACOSYCEA | Gómez Chagala, Braulio 683          | Mexico                                                                  | 2008 | MO        | <i>Ficus_lapathifolia</i> _Gomez_Chagala_683 | This study                                      | SRR24706375 |
| <i>Ficus lapathifolia</i> (Liebm.) Miq.          | PHARMACOSYCEA | Manriquez 3219 J. Fournel & C.      | Mexico                                                                  | 1988 | F         | <i>Ficus_lapathifolia</i> _Manriquez_3219    | This study                                      | SRR24706374 |
| <i>Ficus lateriflora</i> Vahl                    | ASPERAE       | Michenaud JF130                     | Réunion Island<br>Philippines, Palanan                                  | 2005 | REU       | <i>Ficus_lateriflora</i> _Michenaud_JF130    | This study                                      | SRR24706373 |
| <i>Ficus lawesii</i> King                        | CONOSYCEA     | R.D. Harrison 628                   | Forest Dynamics Plot, NE Luzon                                          | 2004 | PUH/MIN   | <i>Ficus_lawesii</i> _Harrison_628           | This study                                      | SRR24706372 |
| <i>Ficus lepicarpa</i> Blume                     | SYCOCARPUS    | EG 919                              | Borneo, Sarawak                                                         | 2020 | SAR, SING | <i>Ficus_lepicarpa</i> _EG_919               | This study                                      | SRR24706371 |
| <i>Ficus lingua</i> Warb. ex De Wild. & T.Durand | GALOGLYCHIA   | N. Rønsted 208                      | Cameroon                                                                | 2004 | K         | <i>Ficus_lingua</i> _N_Ronsted_208           | This study                                      | SRR24706369 |
| <i>Ficus lowii</i> King                          | CONOSYCEA     | Lai Shak Teck S.69654               | Borneo, Sarawak                                                         | 1994 | L.3927087 | <i>Ficus_lowii</i> _L3927087                 | This study                                      | SRR24706368 |
| <i>Ficus luschnathiana</i> (Miq.) Miq.           | AMERICANA     | N. Rønsted 78                       | Cult. (C) S1947-0243. No prov.                                          | 2002 | C         | <i>Ficus_luschnathiana</i> _N_Ronsted_78     | This study                                      | SRR24706367 |
| <i>Ficus lutea</i> Vahl                          | GALOGLYCHIA   | C. Baraloto 8008                    | CF 5120                                                                 |      | ICTB      | <i>Ficus_lutea</i> _CB8008                   | This study<br>NCBI<br>BioProject<br>PRJNA694366 | SRR24706366 |
| <i>Ficus lyrata</i> Warb.                        | GALOGLYCHIA   | unknown                             | Kunming, China<br>Cult. (Montgomery Botanical Center, MBC.16), Florida, |      | ICTB      | <i>Ficus_lyrata</i> _SRR13570494             |                                                 | SRR13570494 |
| <i>Ficus lyrata</i> Warb.                        | GALOGLYCHIA   | C. Baraloto 8091                    | USA                                                                     |      | ICTB      | <i>Ficus_lyrata</i> _CB8091                  | This study                                      | SRR24706365 |
| <i>Ficus lyrata</i> Warb.                        | GALOGLYCHIA   | S.Z. Xiong & al. 2011130            | Cult. (China) No prov.                                                  | 2011 | HSNU      | <i>Ficus_lyrata</i> _HSNU2011130             | This study                                      | SRR24706364 |
| <i>Ficus macbridei</i> Standl.                   | PHARMACOSYCEA | Quisbert Quispe, Javier Martín 1244 | Bolivia                                                                 | 2008 | MO        | <i>Ficus_macbridei</i> _Quisbert_1244        | This study                                      | SRR24706363 |
| <i>Ficus macbridei</i> Standl.                   | PHARMACOSYCEA | Valenzuela Gamarra, Luis 8426       | Peru                                                                    | 2007 | MO        | <i>Ficus_macbridei</i> _Valenzuela_8426      | This study                                      | SRR24706362 |
| <i>Ficus macilenta</i> King                      | ERIOSYCEA     | J.A.R. Anderson S.28620             | Borneo, Sarawak                                                         | 1969 | L.1608816 | <i>Ficus_macilenta</i> _L1608816             | This study                                      | SRR24706361 |

|                                                    |                   |                                                    |                                                                 |      |                   |                                            |            |             |
|----------------------------------------------------|-------------------|----------------------------------------------------|-----------------------------------------------------------------|------|-------------------|--------------------------------------------|------------|-------------|
| <i>Ficus maclellandii</i> King                     | CONOSYC<br>EA     | N. Rønsted 281                                     | Cult. (HITBC) s.n.                                              | 2006 | HITBC             | Ficus_maclellandii_N<br>_Ronsted_281       | This study | SRR24706360 |
| <i>Ficus macrophylla</i> Pers.                     | MALVANT<br>HERA   | C. Baraloto 8092                                   | Cult. (Montgomery Botanical<br>Center, MBC.17), Florida,<br>USA |      | ICTB              | Ficus_macrophylla_C<br>B8092               | This study | SRR24706358 |
| <i>Ficus macrostyla</i> Corner                     | SYCOCAR<br>PUS    | A. Zainudin et al.<br>4528                         | Borneo, Sarawak                                                 | 1993 | L.1608811         | Ficus_macrostyla_L16<br>08811              | This study | SRR24706357 |
| <i>Ficus macrostyla</i> Corner                     | SYCOCAR<br>PUS    | Liao 20190392<br>SAN160562                         | Borneo, Sabah<br>Philippines, Palanan                           | 2019 | SAN               | Ficus_macrostyla_Lia<br>o20190392          | This study | SRR24706356 |
| <i>Ficus magnoliifolia</i> Blume                   | OREOSYC<br>EA     | R.D. Harrison<br>619<br>Liao S. et al.<br>20190340 | Forest Dynamics<br>Plot, NE Luzon                               | 2004 | PUH/MIN           | Ficus_magnoliifolia_H<br>arrison_619       | This study | SRR24706355 |
| <i>Ficus malayana</i> C.C.Berg<br>& Chantaras.     | SYCOCAR<br>PUS    | MANJAKAHERY,<br>SAN160612                          | Borneo, Sabah                                                   | 2019 | SAN               | Ficus_malayana_Liao<br>_20190340           | This study | SRR24706354 |
| <i>Ficus marmorata</i> Bojer<br>ex Baker           | MADAGA<br>SCAR    | Manjakahery,<br>Herisoa N. 406                     | Madagascar                                                      | 2012 | MO                | Ficus_marmorata_Ma<br>njakahery_406        | This study | SRR24706353 |
| <i>Ficus mauritiana</i> Lam.                       | SYCOMOR<br>US     | J. Fournel & C.<br>Michenaud JF89                  | Réunion Island                                                  | 2005 | REU               | Ficus_mauritiana_Fou<br>rnelMichenaud_JF89 | This study | SRR24706352 |
| <i>Ficus maxima</i> Mill.                          | PHARMAC<br>OSYCEA | Rønsted 156                                        | Cult. (BG). Acc.<br>unknown                                     | 2003 | BG                | Ficus_maxima_N_Ron<br>sted_156             | This study | SRR24706351 |
| <i>Ficus maxima</i> Mill.                          | PHARMAC<br>OSYCEA | Wang Gang<br>EPAI 6                                | Cult in XTBG                                                    | 2020 | HITBC,<br>V000009 | Ficus_maxima_SRR13<br>279567               | 10         | SRR13279567 |
| <i>Ficus aff. megaleia</i>                         | SYCOCAR<br>PUS    | EG 881                                             | Borneo, Sarawak                                                 | 2020 | SAR, SING         | Ficus_aff_megaleia_E<br>G881               | This study | SRR24706251 |
| <i>Ficus megaleia</i> Corner                       | SYCOCAR<br>PUS    | Liao S. & al.<br>20190379                          | Borneo, Sabah<br>Philippines, Palanan                           | 2019 | SAN               | Ficus_megaleia_Liao_<br>20190379           | This study | SRR24706350 |
| <i>Ficus melinocarpa</i> Blume                     | ASPERAE           | R.D. Harrison<br>625                               | Forest Dynamics<br>Plot, NE Luzon                               | 2004 | PUH/MIN/K<br>/LAE | Ficus_melinocarpa_R_<br>Harrison_625       | This study | SRR24706349 |
| <i>Ficus menabeensis</i> H.Perrier                 | CONOSYC<br>EA     | Manjakahery,<br>Herisoa N. 405                     | Madagascar                                                      | 2012 | MO                | Ficus_menabeensis_M<br>anjakahery_405      | This study | SRR24706347 |
| <i>Ficus microcarpa</i> L.f.                       | CONOSYC<br>EA     | N. Rønsted 77                                      | Cult. (C). P1979-<br>5041. No. prov.                            | 2002 | C                 | Ficus_microcarpa_Ro<br>nsted_77            | This study | SRR24706346 |
| <i>Ficus microcarpa</i> L.f.                       | CONOSYC<br>EA     | Xiao and He<br>C240081                             | Cult. (HITBC)                                                   | 2009 | HITBC             | Ficus_microcarpa_SR<br>R13279574           | 10         | SRR13279574 |
| <i>Ficus microdictya</i> Diels                     | ADENOSP<br>ERMA   | WG157                                              | Papua New Guinea                                                |      | HITBC             | Ficus_microdictya_SR<br>R13279564          | 10         | SRR13279564 |
| <i>Ficus midotis</i> Corner                        | PALEOMO<br>RPHE   | P. Chai S.36006                                    | Borneo, Sarawak                                                 | 1999 | L.1609660         | Ficus_midotis_L16096<br>60                 | This study | SRR24706345 |
| <i>Ficus minahassae</i> (Teijsm. &<br>Vriese) Miq. | SYCOCAR<br>PUS    | R.D. Harrison<br>614                               | Philippines, Palanan Forest<br>Dynamics Plot, NE Luzon          |      | C                 | Ficus_minahassae_C                         | This study | SRR24706344 |

|                                                                                  |                   |                                                             |                               |      |                       |                                                       |                                       |             |
|----------------------------------------------------------------------------------|-------------------|-------------------------------------------------------------|-------------------------------|------|-----------------------|-------------------------------------------------------|---------------------------------------|-------------|
| <i>Ficus minahassae</i> (Teijsm. & Vriese) Miq.                                  | SYCOCAR<br>PUS    | DD Soejarto & al<br>7529<br>K.M. Matthew,<br>Carnatic Flora | Philippines, Luzon,<br>Bataan | 1991 |                       | Ficus_minahassae_Soe<br>jarto_7529                    | This study                            | SRR24706240 |
| <i>Ficus mollis</i> Vahl                                                         | CONOSYC<br>EA     | Project RHT<br>20451<br>Liao S. et al.<br>20190407          | India, Dharmapuri             | 1978 | L.1598511             | Ficus_mollis_L159851<br>1                             | This study                            | SRR24706239 |
| <i>Ficus montana</i> Burm.f.                                                     | ASPERAE           | SAN160577                                                   | Borneo, Sabah                 | 2019 | SAN                   | Ficus_montana_Liao_<br>20190407                       | This study                            | SRR24706238 |
| <i>Ficus mucoso</i> Welw. ex Ficalho                                             | SYCOMOR<br>US     | N. Rønsted 207                                              | Cameroon                      | 2004 | K                     | Ficus_mucoso_N_Ron<br>sted_207                        | This study                            | SRR24706237 |
| <i>Ficus mutisii</i> Dugand                                                      | PHARMAC<br>OSYCEA | Hoyos-Gómez,<br>Saúl Ernesto 2396                           | Colombia                      | 2013 | MO                    | Ficus_mutisii_HoyosG<br>omez_2396                     | This study                            | SRR24706236 |
| <i>Ficus natalensis</i> Hochst.                                                  | GALOGLY<br>CHIA   | C. Baraloto 8095                                            | TK24                          |      |                       | Ficus_natalensis_CB8<br>095                           | This study                            | SRR24706235 |
| <i>Ficus natalensis leprieurii</i> (Miq.) C.C. Berg                              | GALOGLY<br>CHIA   | H.Q. Li 2009392<br>D.D. Soejarto &<br>N.M. Cuong<br>11525   | Cult. (HITBC) s.n.            | 2009 | HSNU                  | Ficus_natalensis_subs<br>p_leprieurii_HSNU20<br>09392 | This study                            | SRR24706233 |
| <i>Ficus nervosa</i>                                                             | OREOSYC<br>EA     | Liao S. et al.<br>20190344                                  | Vietnam                       | 2000 | L.1596143             | Ficus_nervosa_L1596<br>143                            | This study                            | SRR24706232 |
| <i>Ficus nervosa</i> subsp.<br><i>pubinervis</i> (Blume) C.C. Berg/ <i>Ficus</i> | OREOSYC<br>EA     | SAN160616<br>McPherson,<br>Gordon D. 19246                  | Borneo, Sabah                 | 2019 | SAN                   | Ficus_nervosa_subsp_<br>pubinervis_Liao_2019<br>0344  | This study                            | SRR24706231 |
| <i>Ficus nitidifolia</i> Bureau                                                  | OREOSYC<br>EA     | Liao S. et al.<br>20190423                                  | New Caledonia                 | 2003 | MO                    | Ficus_nitidifolia_McP<br>herson_19246                 | This study                            | SRR24706230 |
| <i>Ficus nota</i> (Blanco) Merr.                                                 | SYCOCAR<br>PUS    | SAN160593<br>Stevens, Warren<br>Douglas 36194               | Borneo, Sabah                 |      |                       | Ficus_nota_Liao_2019<br>0423                          | This study                            | SRR24706229 |
| <i>Ficus nymphaeifolia</i> Mill.                                                 | AMERICA<br>NAE    |                                                             | Nicaragua                     | 2015 | MO<br>C,<br>C10503012 | Ficus_nymphaeifolia_<br>Stevens_36194                 | This study                            | SRR24706228 |
| <i>Ficus obliqua</i> G.Forst.                                                    | MALVANT<br>HERA   | L. Bernadi 12889                                            | Vanuatu                       | 1968 |                       | Ficus_obliqua_C1050<br>3012                           | This study                            | SRR24706227 |
| <i>Ficus obscura</i> Blume                                                       | PALEOMO<br>RPHE   | R.D. Harrison<br>602                                        | Philippines                   |      | PUH                   | Ficus_obscura_RD_H<br>arrison_602                     | This study                            | SRR24706226 |
| <i>Ficus obtusifolia</i> Kunth                                                   | AMERICA<br>NAE    | Stevens, Warren<br>Douglas 33323                            | Nicaragua                     | 2012 | MO                    | Ficus_obtusifolia_Stev<br>ens_33323                   | This study                            | SRR24706225 |
| <i>Ficus oligodon</i> Miq.                                                       | SYCOMOR<br>US     | unknown                                                     | Yunnan, China                 |      |                       | Ficus_oligodon_SRR1<br>5882886                        | NCBI<br>BioProject<br>PRJNA763<br>016 | SRR15882886 |
| <i>Ficus oligodon</i> Miq.                                                       | SYCOMOR<br>US     | Wang EEP AI 17                                              | Cult. (XTBG)                  | 2020 | HITBC<br>V000011      | Ficus_oligodon_SRR1<br>3279562                        | 10                                    | SRR13279562 |

|                                                                                   |                                   |                                                                         |                                                                                               |              |                 |                                                                                                                                                                                                                                                 |                                        |                                                     |
|-----------------------------------------------------------------------------------|-----------------------------------|-------------------------------------------------------------------------|-----------------------------------------------------------------------------------------------|--------------|-----------------|-------------------------------------------------------------------------------------------------------------------------------------------------------------------------------------------------------------------------------------------------|----------------------------------------|-----------------------------------------------------|
| <i>Ficus orthoneura</i> H.Lév. & Vaniot                                           | UROSTIG<br>MA                     | X.M. Wang &<br>J.H. Zhang<br>20190123<br>McPherson,                     | China                                                                                         | 2019         | HSNU            | Ficus_orthoneura_HS<br>NU20190123                                                                                                                                                                                                               | This study                             | SRR24706224                                         |
| <i>Ficus otophora</i> Corner & Guillaumin                                         | OREOSYC<br>EA                     | Gordon D.<br>18581A<br>Antilahimena,                                    | New Caledonia                                                                                 | 2002         | MO              | Ficus_otophora_McPh<br>erson_18581A<br>Ficus_pachyclada_Ant<br>ilahimena_6031                                                                                                                                                                   | This study                             | SRR24706222                                         |
| <i>Ficus pachyclada</i> Baker                                                     | ASPERAE                           | Patrice 6031                                                            | Madagascar                                                                                    | 2008         | MO<br>C,        | Ficus_palmata_Friis16<br>3                                                                                                                                                                                                                      | This study                             | SRR24706221                                         |
| <i>Ficus palmata</i> Forssk.<br><i>Ficus paraensis</i> (Miq.)<br>Miq.             | CARICEAE<br>AMERICA<br>NAE        | I. Friis 163<br>N. Rønsted 107<br>Liao S. et al.<br>20190441            | Ethiopia<br>Cult. (BG) 1989-527.<br>No prov.                                                  | 1970<br>2003 | C10011606<br>K  | Ficus_parietalis_Liao_<br>20190441<br>Ficus_pertusa_N_Ron<br>sted_135<br>Ficus_petiolaris_CB80<br>71<br>Ficus_petiolaris_CB80<br>72<br>Ficus_platypoda_N_R<br>onsted_142<br>Ficus_politoria_O_Ma<br>urin_74<br>Ficus_popenoei_Steve<br>ns_28999 | This study<br>This study               | SRR24706220<br>SRR24706219                          |
| <i>Ficus parietalis</i> Blume                                                     | PALEOMO<br>RPHE<br>AMERICA<br>NAE | 20190441<br>SAN160211<br>N. Rønsted 135                                 | Borneo, Sabah<br>Cult. (BG). 89.529                                                           | 2019<br>2003 | SAN<br>K        | Ficus_parietalis_Liao_<br>20190441<br>Ficus_pertusa_N_Ron<br>sted_135<br>Ficus_petiolaris_CB80<br>71<br>Ficus_petiolaris_CB80<br>72                                                                                                             | This study<br>This study               | SRR24706218<br>SRR24706217                          |
| <i>Ficus pertusa</i> L.f.                                                         | AMERICA<br>NAE                    | C. Baraloto 8071                                                        | FTBG 20070647A                                                                                |              | ICTB            | Ficus_petiolaris_CB80<br>71<br>Ficus_petiolaris_CB80<br>72                                                                                                                                                                                      | This study                             | SRR24706216                                         |
| <i>Ficus petiolaris</i> Kunth<br><i>Ficus platypoda</i> (Miq.)<br>A.Cunn. ex Miq. | AMERICA<br>NAE<br>MALVANT<br>HERA | C. Baraloto 8072<br>N. Rønsted 142                                      | FTBG 20070648A<br>Cult. (BG), 93.220                                                          | 2003         | ICTB<br>K       | Ficus_platypoda_N_R<br>onsted_142<br>Ficus_politoria_O_Ma<br>urin_74<br>Ficus_popenoei_Steve<br>ns_28999                                                                                                                                        | This study<br>This study               | SRR24706215<br>SRR24706212                          |
| <i>Ficus politoria</i> Lam.                                                       | ASPERAE<br>AMERICA<br>NAE         | O. Maurin 74<br>Stevens, Warren<br>Douglas 28999                        | Madagascar<br>Nicaragua<br>Cult. (BG) 1992-<br>1123. Orig. acc.                               |              | K<br>MO         | Ficus_politoria_O_Ma<br>urin_74<br>Ficus_popenoei_Steve<br>ns_28999                                                                                                                                                                             | This study<br>This study               | SRR24706341<br>SRR24706340                          |
| <i>Ficus preussii</i> Warb.                                                       | GALOGLY<br>CHIA                   | N. Rønsted 138                                                          | Turku Bot. Gard.<br>Philippines, Palanan                                                      | 2003         | K               | Ficus_preussii_N_Ron<br>sted_138                                                                                                                                                                                                                | This study                             | SRR24706339                                         |
| <i>Ficus pseudopalma</i> Blanco                                                   | ADENOSP<br>ERMA                   | R.D. Harrison<br>610<br>Zhen Zhang, Jian-<br>Hang Zhang, Jian-<br>ZZ973 | Forest Dynamics<br>Plot, NE Luzon<br>China, Xizang,<br>Linzhi, Motuo                          | 2004<br>2021 | PUH/MIN<br>HSNU | Ficus_pseudopalma_H<br>arrison_610<br>Ficus_pubigera_ZZ97<br>3                                                                                                                                                                                  | This study<br>This study<br>This study | SRR24706338<br>SRR24706337<br>SRR24706337           |
| <i>Ficus pumila</i> L.                                                            | SYNOECI<br>A                      | unknown                                                                 | China, Tiantong National Station of Forest<br>Ecosystem<br>Cult. (C) P1973-<br>5350. No prov. |              |                 | Ficus_pumila_SRR63<br>33171<br>Ficus_pumila_Ronsted<br>_91                                                                                                                                                                                      |                                        | NCBI<br>BioProject<br>PRJNA420<br>118<br>SRR6333171 |
| <i>Ficus pumila</i> L.                                                            | SYNOECI<br>A                      | N. Rønsted 91<br>M. C. Anstett and<br>F. Kjellberg<br>1997-23           |                                                                                               | 2002         | C               |                                                                                                                                                                                                                                                 | This study                             | SRR24706336                                         |
| <i>Ficus punctata</i> Thunb.                                                      | SYNOECI<br>A                      |                                                                         | Brunei                                                                                        | 1997         | MPU             | Ficus_punctata_Kjellb<br>erg_199723                                                                                                                                                                                                             | This study                             | SRR24706335                                         |

|                                                                |                                 |                                                      |                                         |      |            |                                               |                                                 |             |
|----------------------------------------------------------------|---------------------------------|------------------------------------------------------|-----------------------------------------|------|------------|-----------------------------------------------|-------------------------------------------------|-------------|
| <i>Ficus pungens</i> Reinw. ex Blume                           | SYCOCAR<br>PUS<br>OREOSYC<br>EA | W. Takeuchi<br>8767<br>McPherson,<br>Gordon D. 18187 | Papua New Guinea,<br>Morobe             | 1993 |            | <i>Ficus_pungens_Takeuchi_8767</i>            | This study                                      | SRR24706334 |
| <i>Ficus racemigera</i> Bureau                                 |                                 |                                                      | New Caledonia                           | 2001 | MO         | <i>Ficus_racemigera_McPherson_18187</i>       | This study<br>NCBI<br>BioProject<br>PRJNA252599 | SRR24706333 |
| <i>Ficus racemosa</i> L.                                       | SYCOMOR<br>US                   | unknown                                              | Cult. (XTBG)                            |      |            | <i>Ficus_racemosa_SRR1405700</i>              |                                                 | SRR1405700  |
| <i>Ficus recurva</i> Blume                                     | SYNOECI<br>A                    | Niissalo et al.<br>SING2020-675                      | Singapore, Seletar                      | 2020 | SING       | <i>Ficus_cf_recurva_Niissalo_SING2020-675</i> | This study                                      | SRR24706144 |
| <i>Ficus recurva</i> Blume                                     | SYNOECI<br>A                    | EG 839                                               | Borneo, Sarawak                         | 2020 | SAR, SING  | <i>Ficus_recurva_EG_839</i>                   | This study                                      | SRR24706332 |
| <i>Ficus recurva cf. recurva</i> var. <i>elegantior</i> Corner | SYNOECI<br>A                    | EG 840                                               | Borneo, Sarawak                         | 2020 | SAR, SING  | <i>Ficus_recurva_EG_840</i>                   | This study                                      | SRR24706330 |
|                                                                | SYNOECI<br>A                    | P. Chai et al.<br>S.33194                            | Borneo, Sarawak                         | 1973 | L.1610326  | <i>Ficus_recurva_var_elegantior_L1610326</i>  | This study                                      | SRR24706329 |
| <i>Ficus reflexa</i> Thunb.                                    | GALOGLY<br>CHIA                 | O. Maurin 76                                         | Madagascar                              | 2004 | K<br>HITBC | <i>Ficus_reflexa_O_Maurin_76</i>              | This study                                      | SRR24706328 |
| <i>Ficus religiosa</i> L.                                      | UROSTIG<br>MA                   | Wang EEPAI 62                                        | Cult. (XTBG)                            | 2020 | V0000012   | <i>Ficus religiosa_SRR13279560</i>            | 10                                              | SRR13279560 |
| <i>Ficus retusa</i> L.                                         | CONOSYC<br>EA                   | Koorders 9131                                        | Indonesia, Java                         | s.d. | L.1620294  | <i>Ficus_retusa_L1620294</i>                  | This study                                      | SRR24706327 |
| <i>Ficus rosulata</i> C.C.Berg                                 | SYCOCAR<br>PUS                  | J.A.R. Anderson<br>S.28310                           | Borneo, Sarawak                         | 1969 | L.1616418  | <i>Ficus_rosulata_L1616418</i>                | This study                                      | SRR24706326 |
| <i>Ficus rosulata</i> C.C.Berg                                 | SYCOCAR<br>PUS                  | A. Zainudin et al.<br>4548                           | Borneo, Sarawak                         | 1993 | L.1620666  | <i>Ficus_rosulata_L1620666</i>                | This study                                      | SRR24706325 |
| <i>Ficus rosulata</i> C.C.Berg                                 | SYCOCAR<br>PUS                  | Niissalo et al.<br>SING2019_300                      | Singapore                               | 2019 | SING       | <i>Ficus_rosulata_SING2019_300</i>            | This study                                      | SRR24706324 |
| <i>Ficus rubiginosa aff. rubiginosa</i> Desf. ex Vent.         | MALVANT<br>HERA                 | J.W. Adams<br>JWA_601                                | Cult. (Hawaii) 1549.<br>No prov.        | 2020 | HSNU       | <i>Ficus_aff_rubiginosa_HSNU_JWA_601</i>      | This study                                      | SRR24706425 |
| <i>Ficus rubiginosa</i> Desf. ex Vent.                         | MALVANT<br>HERA                 | N. Rønsted 89                                        | Cult. (C). E1859-0014. No prov.         | 2002 | C          | <i>Ficus_rubiginosa_Rønsted_89</i>            | This study                                      | SRR24706323 |
| <i>Ficus rubroscapitata</i> Corner                             | PALEOMO<br>RPHE                 | EG530                                                | Borneo, Sarawak<br>Philippines, Palanan | 2017 | SAR, F     | <i>Ficus_rubroscapitata_EG530</i>             | This study                                      | SRR24706322 |
| <i>Ficus ruficaulis</i> Merr.                                  | ERIOSYCE<br>A                   | R.D. Harrison<br>626                                 | Forest Dynamics<br>Plot, NE Luzon       | 2004 | PUH/MIN/K  | <i>Ficus_ruficaulis_RD_Harrison_626</i>       | This study                                      | SRR24706321 |
| <i>Ficus ruginervia</i> Corner                                 | SYNOECI<br>A                    | EG 846                                               | Borneo, Sarawak                         | 2020 | SAR, SING  | <i>Ficus_ruginervia_EG_846</i>                | This study                                      | SRR24706319 |
| <i>Ficus rumphii</i> Blume                                     | CONOSYC<br>EA                   | N. Rønsted 74                                        | Cult. (C). P1953-5105. No prov.         | 2002 | C          | <i>Ficus_rumphii_N_Rønsted_74</i>             | This study                                      | SRR24706318 |
| <i>Ficus sagittata</i> Vahl                                    | SYNOECI<br>A                    | EG 850                                               | Borneo, Sarawak                         | 2020 | SAR, SING  | <i>Ficus_sagittata_EG_850</i>                 | This study                                      | SRR24706317 |
| <i>Ficus sagittata</i> Vahl                                    | SYNOECI<br>A                    | NT Hiep NTH<br>4247                                  | Vietnam, Ninh Binh<br>Prov.             | 2000 | F          | <i>Ficus_sagittata_Hiep_NTH4247</i>           | This study                                      | SRR24706316 |

|                                                                  |                 |                                                               |                                                                                |      |                  |                                               |            |             |
|------------------------------------------------------------------|-----------------|---------------------------------------------------------------|--------------------------------------------------------------------------------|------|------------------|-----------------------------------------------|------------|-------------|
| <i>Ficus sagittata</i> Vahl                                      | SYNOECI<br>A    | N. Rønsted 266                                                | Cult. (HITBC) s.n.                                                             | 2006 | HITBC            | <i>Ficus sagittata</i> _Ronsted_266           | This study | SRR24706315 |
| <i>Ficus sagittata</i> Vahl                                      | SYNOECI<br>A    | Niissalo et al.<br>SING2019_492                               | Singapore                                                                      | 2019 |                  | <i>Ficus sagittata</i> _SING2019_492          | This study | SRR24706314 |
| <i>Ficus sagittata</i> Vahl                                      | SYNOECI<br>A    | Wang EEPAI 15                                                 | Cult. (XTBG)                                                                   | 2020 | HITBC<br>V000004 | <i>Ficus sagittata</i> _SRR13279554           | 10         | SRR13279554 |
| <i>Ficus sagittifolia</i> Warb.<br>ex Mildbr. & Burret           | GALOGLY<br>CHIA | M.W. Chase 19852                                              |                                                                                |      | K                | <i>Ficus sagittifolia</i> _ERR4009362         | 2          | ERS4414205  |
| <i>Ficus salicifolia</i> Vahl                                    | UROSTIG<br>MA   | C. Baraloto 8053                                              | Cult. (USDA Subtropical Horticulture Research Station, CF 36270), Florida, USA |      | ICTB             | <i>Ficus salicifolia</i> _CB8053              | This study | SRR24706313 |
| <i>Ficus sansibarica</i> Warb.                                   | GALOGLY<br>CHIA | N. Rønsted 127<br>J.A.R. Anderson                             | Orig. acc. Utrecht Bot. Gard.                                                  | 2003 | K                | <i>Ficus sansibarica</i> _N_Ronsted_127       | This study | SRR24706312 |
| <i>Ficus sarawakensis</i> Corner                                 | SYNOECI<br>A    | & Ilias Paie<br>S.28606                                       | Borneo, Sarawak                                                                | 1969 | L 0040286        | <i>Ficus sarawakensis</i> _L0040286           | This study | SRR24706311 |
| <i>Ficus sarmentosa</i> Buch.-Ham. ex Sm. var. <i>lachrymans</i> | SYNOECI<br>A    | Zhen Zhang,<br>XEP10                                          | China, Hubei, Xuanen, Enshi                                                    | 2015 | HSNU             | <i>Ficus sarmentosa</i> _var_lachrymans_XEP10 | This study | SRR24706310 |
| <i>Ficus sarmentosa</i> Buch.-Ham. ex Sm. var. <i>sarmentosa</i> | SYNOECI<br>A    | Zhen Zhang,<br>JLP5                                           | China, Tibet, Rikaze, Nilamu                                                   | 2017 | HSNU             | <i>Ficus sarmentosa</i> _var_sarmentosa_JLP5  | This study | SRR24706308 |
| <i>Ficus sarmentosa</i> Buch.-Ham. ex Sm. var. <i>thunbergii</i> | SYNOECI<br>A    | Zhi-Hui Su,<br>Sasaki Ayako,<br>OKP9                          | Japan, Ryukyu                                                                  | 2017 | HSNU             | <i>Ficus sarmentosa</i> _var_thunbergii_OKP9  | This study | SRR24706307 |
| <i>Ficus satterthwaitei</i>                                      | SYCOCAR<br>PUS  | Liao S. et al.<br>20190360<br>SAN160632                       | Borneo, Sabah Philippines, Palanan                                             |      |                  | <i>Ficus satterthwaitei</i> _Liao_20190360    | This study | SRR24706305 |
| <i>Ficus satterthwaitei</i> Elmer                                | SYCOCAR<br>PUS  | R.D. Harrison<br>617                                          | Forest Dynamics Plot, NE Luzon                                                 | 2004 | PUH              | <i>Ficus satterthwaitei</i> _Harrison_617     | This study | SRR24706306 |
| <i>Ficus scaberrima</i> Blume                                    | PALEOMO<br>RPHE | Ilias Paie S.41706<br>Liao S. et al.<br>20190457<br>SAN160227 | Borneo, Sarawak                                                                | 1980 | L.1615303        | <i>Ficus pisifera</i> _L1615303               | This study | SRR24706214 |
| <i>Ficus scaberrima</i> Blume                                    | PALEOMO<br>RPHE |                                                               | Borneo, Sabah Cult. (BG) 1988-293.                                             | 2019 | SAN              | <i>Ficus scaberrima</i> _Liao_20190457        | This study | SRR24706304 |
| <i>Ficus scassellatii</i> Pamp.                                  | GALOGLY<br>CHIA | N. Rønsted 110                                                | Orig. acc. Utrecht Bot. Gard.                                                  | 2003 | K                | <i>Ficus scassellatii</i> _N_Ronsted_110      | This study | SRR24706303 |
| <i>Ficus schumacheri</i> (Liebm.) Griseb.                        | AMERICA<br>NAE  | C. Baraloto 8100                                              | CF 36278                                                                       |      | ICTB             | <i>Ficus schumacheri</i> _CB8100              | This study | SRR24706302 |
| <i>Ficus scortechinii</i> King                                   | SYCOCAR<br>PUS  | Niissalo<br>SING2019_807                                      | Singapore                                                                      | 2019 | SING             | <i>Ficus scortechinii</i> _SING2019_807       | This study | SRR24706301 |

|                                                |                   |                                                    |                                                                                      |      |                           |                                         |                                                   |                              |
|------------------------------------------------|-------------------|----------------------------------------------------|--------------------------------------------------------------------------------------|------|---------------------------|-----------------------------------------|---------------------------------------------------|------------------------------|
| <i>Ficus scratchleyana</i> King                | SYNOECI<br>A      | R. Johns PP10456                                   | Indonesia, Papua<br>Cult. (BG) 1989-523.                                             |      | K                         | Ficus_scratchleyana_J<br>ohns_PP10456   | This study                                        | SRR24706300                  |
| <i>Ficus cf. segoviae</i>                      | PHARMAC<br>OSYCEA | N. Rønsted 119                                     | No prov.                                                                             | 2003 | K                         | Ficus_cf_segoviae_N_<br>Ronsted_119     | This study                                        | SRR24706142                  |
| <i>Ficus segoviae</i> Miq.                     | PHARMAC<br>OSYCEA | Morales Quirós,<br>Juan Francisco<br>2472          | Costa Rica                                                                           | 1994 | MO                        | Ficus_segoviae_Moral<br>es_2472         | This study                                        | SRR24706299                  |
| <i>Ficus semicordata</i> Buch.-<br>Ham. ex Sm. | HEMICAR<br>DIA    | B. Chanterasuwan<br>s.n.                           | Thailand                                                                             | 2005 | No voucher<br>information | Ficus_semicordata_Ch<br>anterasuwana_sn | This study<br>NCBI<br>BioProject<br>PRJDB181<br>1 | SRR24706297<br><br>DRR031427 |
| <i>Ficus septica</i> Burm.f.                   | SYCOCAR<br>PUS    | unknown                                            | Okinawa, Japan<br>Philippines, Palanan                                               |      |                           | Ficus_septica_DRR03<br>1427             |                                                   | DRR031427                    |
| <i>Ficus septica</i> Burm.f.                   | SYCOCAR<br>PUS    | R.D. Harrison<br>618<br>Liao S. et al.<br>20190332 | Forest Dynamics<br>Plot, NE Luzon                                                    | 2004 | PUH/MIN                   | Ficus_septica_C                         | This study                                        | SRR24706296                  |
| <i>Ficus sinuata</i> Thunb.                    | PALEOMO<br>RPHE   | SAN160604                                          | Borneo, Sabah                                                                        | 2019 | SAN                       | Ficus_sinuata_Liao_2<br>0190332         | This study                                        | SRR24706295                  |
| <i>Ficus sp.</i>                               | OREOSYC<br>EA     | E. Gardner 526                                     | Borneo, Sarawak                                                                      | 2017 | SAR, F                    | Ficus_sp_E_Gardner_<br>526              | This study                                        | SRR24706294                  |
| <i>Ficus sp.</i>                               | PHARMAC<br>OSYCEA | Weiblen 1674                                       | French Guiana                                                                        | 2002 | MIN                       | Ficus_sp>Weiblen167<br>4                | This study                                        | SRR24706293                  |
| <i>Ficus sp.</i>                               | PHARMAC<br>OSYCEA | Wang Gang<br>EPAI 7                                | Brazil                                                                               |      | HITBC,<br>V000013         | Ficus_sp_SRR132795<br>68                | 10                                                | SRR13279568                  |
| <i>Ficus spiralis</i> Corner                   | SYNOECI<br>A      | Othman S.41470                                     | Borneo, Sarawak                                                                      | 1979 | L.1616561                 | Ficus_spiralis_L16165<br>61             | This study                                        | SRR24706292                  |
| <i>Ficus squamosa</i> Roxb.                    | SYCOCAR<br>PUS    | unknown                                            | Yunnan, China                                                                        |      |                           | Ficus_squamosa_SRR<br>15882953          | 13                                                | SRR15882953                  |
| <i>Ficus sterrocarpa</i> Diels                 | MALVANT<br>HERA   | G.D. Weiblen<br>1126                               | Papua New Guinea,<br>Sepik Province                                                  | 2000 | MIN                       | Ficus_sterocarpa_G_<br>Weiblen_1126     | This study                                        | SRR24706291                  |
| <i>Ficus stolonifera</i> King                  | SYCOCAR<br>PUS    | EG 823                                             | Borneo, Sarawak                                                                      | 2020 | SAR, SING                 | Ficus_stolonifera_EG_<br>823            | This study                                        | SRR24706290                  |
| <i>Ficus stolonifera</i> King                  | SYCOCAR<br>PUS    | EG 842                                             | Borneo, Sarawak                                                                      | 2020 | SAR, SING                 | Ficus_stolonifera_EG_<br>842            | This study                                        | SRR24706289                  |
| <i>Ficus stolonifera</i> King                  | SYCOCAR<br>PUS    | EG 906<br>Liao S. et al.<br>20190384               | Borneo, Sarawak                                                                      | 2020 | SAR, SING                 | Ficus_stolonifera_EG_<br>906            | This study                                        | SRR24706288                  |
| <i>Ficus stolonifera</i> King                  | SYCOCAR<br>PUS    | SAN160553                                          | Borneo, Sabah                                                                        | 2019 | SAN                       | Ficus_stolonifera_Liao<br>_20190384     | This study                                        | SRR24706286                  |
| <i>Ficus stuhlmannii</i> Warb.                 | GALOGLY<br>CHIA   | C. Baraloto 8057                                   | Cult. (USDA Subtropical<br>Horticulture Research Station,<br>CF 36281), Florida, USA |      | ICTB                      | Ficus_stuhlmannii_CB8<br>057            | This study                                        | SRR24706285                  |
| <i>Ficus subcordata</i> Blume                  | CONOSYC<br>EA     | C. Baraloto 8098                                   | Cult. (The Kampong), Miami,<br>Florida, USA (TK27)                                   |      | ICTB                      | Ficus_subcordata_CB<br>8098             | This study                                        | SRR24706283                  |

|                                                           |                   |                                          |                                                           |      |               |                                        |                                                 |                           |
|-----------------------------------------------------------|-------------------|------------------------------------------|-----------------------------------------------------------|------|---------------|----------------------------------------|-------------------------------------------------|---------------------------|
| <i>Ficus subcordata</i> Blume                             | CONOSYC<br>EA     | D.D. Soejarto et al. 6417                | Philippines, Palawan                                      | 1989 | F, F2031894   | Ficus_subcordata_F2031894              | This study                                      | SRR24706282               |
| <i>Ficus subcordata</i> Blume                             | CONOSYC<br>EA     | Anderson S.28380                         | Borneo, Sarawak                                           | 1969 | L.1616807     | Ficus_subcordata_L1616807              | This study                                      | SRR24706281               |
| <i>Ficus subulata</i> Blume                               | PALEOMO<br>RPHE   | EG 876                                   | Borneo, Sarawak                                           | 2020 | SAR, SING     | Ficus_subulata_EG_876                  | This study                                      | SRR24706280               |
| <i>Ficus subulata</i> Blume                               | PALEOMO<br>RPHE   | N. Rønsted 299                           | Cult. (HITBC) s.n.                                        | 2006 | HITBC         | Ficus_subulata_N_Rønsted_299           | This study                                      | SRR24706279               |
| <i>Ficus subulata</i> Blume                               | PALEOMO<br>RPHE   | Niissalo et al. 259                      | Singapore                                                 | 2020 | SING          | Ficus_subulata_SING_259                | This study                                      | SRR24706278               |
| <i>Ficus sundaica</i> Blume                               | CONOSYC<br>EA     | Lee Meng Hock S.40604                    | Borneo, Sarawak                                           | 1979 | L.1612213     | Ficus_sundaica_L1612213                | This study                                      | SRR24706277               |
| <i>Ficus sur</i> Forssk.                                  | SYCOMOR<br>US     | N. Rønsted 76<br>Liao S. et al. 20190342 | No prov.                                                  | 2002 | C             | Ficus_sur_Rønsted_76                   | This study                                      | SRR24706275               |
| <i>Ficus tarennifolia</i> Corner                          | SYCOCAR<br>PUS    | SAN160614                                | Borneo, Sabah<br>Cult. (BG) 1988-281.                     | 2019 | SAN           | Ficus_tarennifolia_Liao_20190342       | This study                                      | SRR24706274               |
| <i>Ficus tessellata</i> Warb.                             | GALOGLY<br>CHIA   | N. Rønsted 143                           | Orig. acc. Utrecht<br>Bot. Gard.                          | 2003 | K             | Ficus_tesselata_N_Rønsted_143          | This study                                      | SRR24706273               |
| <i>Ficus thonningii</i> Blume                             | GALOGLY<br>CHIA   | N. Rønsted 231                           | Cameroon                                                  | 2004 | K             | Ficus_thonningii_N_Rønsted_231         | This study<br>NCBI<br>BioProject<br>PRJNA432314 | SRR24706272<br>SRR6663248 |
| <i>Ficus tikoua</i> Bureau                                | SYCOMOR<br>US     | unknown                                  | Guiyang, China                                            |      |               | Ficus_tikoua_SRR6663248                |                                                 |                           |
| <i>Ficus tiliifolia</i> Baker                             | SYCOMOR<br>US     | O. Maurin 87                             | Madagascar                                                | 2004 | K             | Ficus_tiliifolia_Maurin_87             | This study                                      | SRR24706271               |
| <i>Ficus tinctoria</i> G.Forst.                           | PALEOMO<br>RPHE   | N. Rønsted 99                            | Cult. (BG) 1989.551.<br>No prov.                          | 2003 | K             | Ficus_tinctoria_Rønsted_99             | This study                                      | SRR24706270               |
| <i>Ficus tinctoria</i> subsp. <i>gibbosa</i> (Bl.) Corner | PALEOMO<br>RPHE   | J.A.R. Anderson S.28305                  | Borneo, Sarawak                                           | 1969 | L.1621403     | Ficus_tinctoria_subsp_gibbosa_L1621403 | This study                                      | SRR24706269               |
| <i>Ficus tonduzii</i> Standl.                             | PHARMAC<br>OSYCEA | Monteagudo 14187                         | Peru                                                      | 2007 | F             | Ficus_tonduzii_Monteagudo_14187        | This study                                      | SRR24706268               |
| <i>Ficus torrentium</i> H.Perrier                         | SYCOMOR<br>US     | Rakotonirina, Casmir Zoly 97             | Madagascar                                                | 2013 | MO            | Ficus_torrentium_Rakotonirina_97       | This study                                      | SRR24706267               |
| <i>Ficus torresiana</i> Standl.                           | PHARMAC<br>OSYCEA | Estonda 2258                             | Costa Rica                                                | 1995 | F             | Ficus_torresiana_Estonda_2258          | This study                                      | SRR24706266               |
| <i>Ficus treubii</i> King                                 | SYCOCAR<br>PUS    | EG 856                                   | Borneo, Sarawak                                           | 2020 | SAR, SING     | Ficus_cf_treubii_EG856                 | This study                                      | SRR24706141               |
| <i>Ficus treubii</i> King                                 | SYCOCAR<br>PUS    | J.A.R. Anderson S.28750                  | Borneo, Sarawak                                           | 1969 | L.1613164     | Ficus_treubii_L1613164                 | This study                                      | SRR24706264               |
| <i>Ficus trichocarpa</i> Blume                            | SYNOECI<br>A      | R.D. Harrison 624                        | Philippines, Palanan<br>Forest Dynamics<br>Plot, NE Luzon | 2004 | PUH/MIN/K/LAE | Ficus_trichocarpa_Harrison_624         | This study                                      | SRR24706263               |



|                                                   |                   |                                                       |                                                           |      |                          |                                       |            |             |
|---------------------------------------------------|-------------------|-------------------------------------------------------|-----------------------------------------------------------|------|--------------------------|---------------------------------------|------------|-------------|
| <i>Ficus trichocarpa</i> cf.                      | SYNOECI<br>A      | R.D. Harrison<br>600                                  | Philippines, Palanan<br>Forest Dynamics<br>Plot, NE Luzon | 2004 | PUH/MIN/K<br>/LAE        | Ficus_cf_trichocarpa_<br>Harrison_600 | This study | SRR24706140 |
| <i>Ficus trichopoda</i> Baker                     | GALOGLY<br>CHIA   | N. Rønsted 118                                        | Cult. (BG) 1988-267.<br>No prov.                          | 2003 | K                        | Ficus_trichopoda_N_<br>Ronsted_118    | This study | SRR24706262 |
| <i>Ficus triloba</i> Buch.-Ham.<br>ex Voigt       | ERIOSYCE<br>A     | Wang EEPAI 16                                         | Cult. (XTBG)                                              | 2020 | HITBC<br>V000003         | Ficus_triloba_SRR132<br>79555         | 10         | SRR13279555 |
| <i>Ficus tsiangii</i> Corner                      | SINOSYCI<br>DIUM  | N. Rønsted 298                                        | Cult. (HITBC) s.n.                                        | 2006 | HITBC                    | Ficus_tsiangii_Ronste<br>d_298        | This study | SRR24706261 |
| <i>Ficus uncinata</i> (King)<br>Becc.             | SYCOCAR<br>PUS    | EG 837                                                | Borneo, Sarawak                                           | 2020 | SAR, SING                | Ficus_uncinata_EG_8<br>37             | This study | SRR24706259 |
| <i>Ficus uncinata</i> (King)<br>Becc.             | SYCOCAR<br>PUS    | EG 880                                                | Borneo, Sarawak                                           | 2020 | SAR, SING                | Ficus_uncinata_EG_8<br>80             | This study | SRR24706184 |
| <i>Ficus uncinata</i> aff                         | SYCOCAR<br>PUS    | EG 891<br>Liao S. et al.<br>20190356                  | Borneo, Sarawak                                           | 2020 | SAR, SING                | Ficus_aff_uncinata_E<br>G_891         | This study | SRR24706414 |
| <i>Ficus uniglandulosa</i> Wall.                  | PALEOMO<br>RPHE   | SAN160628                                             | Borneo, Sabah                                             | 2019 | SAN                      | Ficus_uniglandulosa_<br>Liao_20190356 | This study | SRR24706183 |
| <i>Ficus urnigera</i> Miq.                        | SYNOECI<br>A      | Lei et al. S.64082                                    | Borneo, Sarawak                                           | 1991 | L.1617759                | Ficus_urnigera_L1617<br>759           | This study | SRR24706182 |
| <i>Ficus vaccinioides</i> Hemsl. &<br>King        | FRUTESCE<br>NTIAE | C. Baraloto 8068                                      | F03                                                       |      | ICTB                     | Ficus_vaccinioides_C<br>B8068         | This study | SRR24706181 |
| <i>Ficus variegata</i> Blume                      | SYCOMOR<br>US     | EG 870                                                | Borneo, Sarawak                                           | 2020 | SAR, SING                | Ficus_variegata_EG_8<br>70            | This study | SRR24706180 |
| <i>Ficus variegata</i> Blume                      | SYCOMOR<br>US     | EG 873                                                | Borneo, Sarawak                                           | 2020 | SAR, SING                | Ficus_variegata_EG_8<br>73            | This study | SRR24706178 |
| <i>Ficus variegata</i> Blume                      | SYCOMOR<br>US     | EG 901<br>Jongkind, Carel<br>Christiaan Hugo<br>11646 | Borneo, Sarawak                                           | 2020 | SAR, SING                | Ficus_variegata_EG_9<br>01            | This study | SRR24706177 |
| <i>Ficus variifolia</i> Warb.                     | ALBIPILA<br>E     | Niissalo<br>CTFS_L5_04509                             | Guinea<br>Singapore, Bukit Timah<br>Nature Reserve        | 2012 | MO                       | Ficus_variifolia_Jongk<br>ind_11646   | This study | SRR24706176 |
| <i>Ficus vasculosa</i> Wall. ex<br>Miq.           | OREOSYC<br>EA     | Wen C500013                                           | Cult. (XTBG)                                              | 2011 | SING<br>HITBC0021<br>849 | Ficus_vasculosa_CTF<br>S_L5_04509     | This study | SRR24706175 |
| <i>Ficus vasculosa</i> Wall. ex<br>Miq.           | OREOSYC<br>EA     | Stevens, Warren<br>Douglas 36499                      | Nicaragua                                                 | 2015 | MO                       | Ficus_vasculosa_SRR<br>13279553       | 10         | SRR13279553 |
| <i>Ficus velutina</i> Humb. &<br>Bonpl. ex Willd. | AMERICA<br>NAE    | N. Rønsted 115                                        | Cult. (BG) 1990-<br>1239. South Africa.                   | 2003 | MO                       | Ficus_velutina_Steven<br>s_36499      | This study | SRR24706174 |
| <i>Ficus verruculosa</i> Warb.                    | UROSTIG<br>MA     | N. Rønsted 115                                        | Cult. (BG) 1990-<br>1239. South Africa.                   | 2003 | K                        | Ficus_verruculosa_NR<br>onsted_115    | This study | SRR24706173 |
| <i>Ficus villosa</i> Blume                        | SYNOECI<br>A      | EG 832<br>Niissalo et al.<br>SING2019_267             | Borneo, Sarawak                                           | 2020 | SAR, SING                | Ficus_villosa_EG_832<br>832           | This study | SRR24706172 |
| <i>Ficus villosa</i> Blume                        | SYNOECI<br>A      | SING2019_267                                          | Singapore                                                 | 2019 | SING                     | Ficus_villosa_SING20<br>19_267        | This study | SRR24706171 |

|                                                                                                       |                         |                                                                        |                                                             |      |                       |  |  | NCBI<br>BioProject<br>PRJNA694<br>366                                        |                                                        |
|-------------------------------------------------------------------------------------------------------|-------------------------|------------------------------------------------------------------------|-------------------------------------------------------------|------|-----------------------|--|--|------------------------------------------------------------------------------|--------------------------------------------------------|
| <i>Ficus virens</i> Aiton                                                                             | UROSTIG<br>MA           | unknown                                                                | Kunming, China                                              |      |                       |  |  | Ficus_virens_SRR135<br>70492                                                 | SRR13570492                                            |
| <i>Ficus virens</i> Aiton                                                                             | UROSTIG<br>MA           | G.D. Weiblen 555                                                       | Papua New Guinea,<br>Pandang Province                       | 1995 | A/LAE/CRI             |  |  | Ficus_virens_G_Weibl<br>en_555                                               | This study<br>SRR24706170                              |
| <i>Ficus virgata</i> Reinw. ex<br>Blume                                                               | PALEOMO<br>RPHE         | N. Rønsted 65                                                          | Cult. (BG) P1986-<br>5148.                                  | 2002 | C                     |  |  | Ficus_virgata_N_Rons<br>ted_65                                               | This study<br>SRR24706169                              |
| <i>Ficus vogeliana</i> (Miq.)<br>Miq.                                                                 | SYCOMOR<br>US           | N. Rønsted 214                                                         | Cameroon                                                    | 2004 | K                     |  |  | Ficus_vogeliana_N_R<br>onsted_214                                            | This study<br>SRR24706167                              |
| <i>Ficus wassa</i> Roxb.                                                                              | PHAEOPIL<br>OSAE        | T. Utteridge                                                           | Indonesia, Papua                                            |      |                       |  |  | Ficus_wassa_T_Utter<br>idge                                                  | This study<br>SRR24706166                              |
| <i>Ficus<br/>watkinsiana</i> F.M.Bailey                                                               | MALVANT<br>HERA         | C. Baraloto 8012                                                       | CF 3534                                                     |      |                       |  |  | Ficus_watkinsiana_CB<br>8012                                                 | This study<br>SRR24706165                              |
| <i>Ficus<br/>watkinsiana</i> F.M.Bailey                                                               | MALVANT<br>HERA         | B. Rodriguez PI<br>78600                                               | Cult. (USDA-ARS)<br>MIA 3534. Australia                     | 2021 | HSNU                  |  |  | Ficus_watkinsiana_HS<br>NU_PI78600                                           | This study<br>SRR24706164                              |
| <i>Ficus webbia</i> (Miq.)<br>Miq.                                                                    | OREOSYC<br>EA           | McPherson,<br>Gordon D. 18179                                          | New Caledonia                                               | 2001 | MO                    |  |  | Ficus_webbiana_McP<br>herson_18179                                           | This study<br>SRR24706163                              |
| <i>Ficus xylophylla</i> (Miq.)<br>Wall. ex Miq.                                                       | CONOSYC<br>EA           | Niissalo et al.<br>SING2019_828                                        | Singapore<br>Papua New Guinea,<br>Utai, Sandaun<br>Province | 2019 | SING                  |  |  | Ficus_xylophylla_SIN<br>G2019_828                                            | This study<br>SRR24706162                              |
| <i>Ficus xylosyca</i> Diels                                                                           | MALVANT<br>HERA         | G.D. Weiblen<br>2047                                                   | Utai, Sandaun<br>Province                                   | 2003 | MIN                   |  |  | Ficus_xylosyca_Weib<br>len_2047                                              | This study<br>SRR24706161                              |
| <i>Ficus yoponensis</i> Desv.                                                                         | PHARMAC<br>OSYCEA       | Stevens, Warren<br>Douglas 37406<br>J. Korning and K.<br>Thomsen 47824 | Nicaragua<br>Napo, Ecuador                                  | 2016 | MO<br>C,<br>C10011604 |  |  | Ficus_yoponensis_Ste<br>vens_37406<br>Helicostylis_tomentos<br>a_C10011604   | This study<br>SRR24706160<br>this study<br>SRR24706159 |
| <i>Helicostylis tomentosa</i><br><i>Helicostylis towarensis</i><br>(Klotzsch & H.Karst.)<br>C.C. Berg | Olmedieae<br>Olmedieae  | Chapi Siñani,<br>Neftali 63                                            | Bolivia                                                     | 2006 | MO                    |  |  | Helicostylis_tovarensi<br>s_Chapi_63<br>Helicostylis_turbinata<br>_F_1247063 | this study<br>SRR24706158<br>this study<br>SRR24706210 |
| <i>Helicostylis turbinata</i>                                                                         | Olmedieae               | Fróes 21444                                                            | Brazil                                                      | 1945 | F 1247063             |  |  |                                                                              |                                                        |
| <i>Hullettia dumosa</i> King                                                                          | Parartocarp<br>eae      | N. Zerega & al.<br>242                                                 | Malaysia (Peninsula)                                        | 2002 | CHIC                  |  |  | Hullettia_dumosa                                                             | 7<br>SRR12283106                                       |
| <i>Hullettia griffithiana</i><br>(Kurz) Hook.f.                                                       | Parartocarp<br>eae      | Kerr 16866                                                             | Thailand                                                    | 1929 | US                    |  |  | Hullettia_griffithiana                                                       | 7<br>SRR12282908                                       |
| <i>Leucosyke capitellata</i><br>(Poir.) Wedd.                                                         | Outgroup:<br>Urticaceae | Lugas 41                                                               |                                                             | 1995 | K                     |  |  | Leucosyke_capitellata                                                        | 2<br>ERS4414208                                        |
| <i>Maclura africana</i><br>(Bureau) Corner                                                            | Chlorophor<br>eae       | Greenway &<br>Kanuri 15269                                             | Tanzania                                                    |      |                       |  |  | Maclura_africana                                                             | 2<br>SRR12282990                                       |
| <i>Maclura amboinensis</i><br>Blume                                                                   | Chlorophor<br>eae       | Takeuchi 16378                                                         | Papua New Guinea                                            | 2002 | US                    |  |  | Maclura_amboinensis                                                          | 2<br>SRR12282979                                       |
| <i>Maclura andamanica</i><br>(Hook.f.) Corner                                                         | Chlorophor<br>eae       | Maxwell 89-436                                                         | Thailand                                                    | 1989 | L                     |  |  | Maclura_andamanica                                                           | 2<br>SRR12282968                                       |

|                                                                      |              |                                                |                                          |      |                    |                                                       |            |             |
|----------------------------------------------------------------------|--------------|------------------------------------------------|------------------------------------------|------|--------------------|-------------------------------------------------------|------------|-------------|
| <i>Maclura cochinchinensis</i> (Lour.) Corner                        | Chlorophorae | Sino-American Guizhou Botanical Expedition 887 | China Guizhou                            |      | NY                 | <i>Maclura_cochinchinensis</i>                        | 2          | SRR12282958 |
| <i>Maclura fruticosa</i> (Roxb.) Corner                              | Chlorophorae | Cuong & al. 1193                               | Vietnam                                  |      | F                  | <i>Maclura_fruticosa</i>                              | 2          | SRR12282957 |
| <i>Maclura pomifera</i> (Raf.) C.K.Schneid.                          | Chlorophorae | Gardner 139                                    | USA (Illinois)                           | 2014 | CHIC               | <i>Maclura_pomifera</i>                               | 4          | SRR3907028  |
| <i>Maclura sp.</i>                                                   | Chlorophorae | Averyanov & al CBL1198                         | Vietnam                                  | 1998 | MO                 | <i>Maclura_pubescens</i>                              | 2          | SRR12283001 |
| <i>Maclura spinosa</i> (Willd.) C.C.Berg                             | Chlorophorae | Perumal RHT 22554                              | India                                    |      | L                  | <i>Maclura_spinosa</i>                                | 2          | SRR12282955 |
| <i>Maclura tinctoria</i> (L.) D.Don ex Steud subsp. <i>tinctoria</i> | Chlorophorae | Campos & Diaz 2679                             | <i>Maclura_tinctoria_subsp_tinctoria</i> |      | F Peru             |                                                       | 2          | SRR12282951 |
| <i>Maclura tinctoria</i> subsp. <i>mora</i> (Griseb.) Vázq.Avila     | Chlorophorae | Nee 40044                                      | Bolivia                                  |      | NY                 | <i>Maclura_tinctoria_subsp_mora</i>                   | 2          | SRR12282952 |
| <i>Maclura tricuspidata</i> Carrière                                 | Chlorophorae | Gardner MOR 68-7917                            | USA (Illinois)                           | 2018 | MOR K (K000618265) | <i>Maclura_tricuspidata</i>                           | 2          | SRR12282950 |
| <i>Maillardia borbonica</i> Duch.                                    | Moreae       | Cadet 4518                                     | Réunion                                  | 1973 | 5)                 | <i>Maillardia_borbonica</i>                           | 2          | ERS4414217  |
| <i>Maillardia montana</i> Leandri                                    | Moreae       | Andrianantoanina 1023                          | Madagascar                               | 1996 | F                  | <i>Maillardia_montana</i>                             | 2          | SRR12283024 |
| <i>Malaisia scandens</i> (Lour.) Planch.                             | Dorstenieae  | Gardner & al. 122                              | Borneo                                   | 2013 | F, SAN             | <i>Malaisia_scandens</i>                              | 2          | SRR12283025 |
| <i>Malcura brasiliensis</i> Endl.                                    | Chlorophorae | Nee & Vargas 45025                             | Bolivia                                  |      | NY                 | <i>Maclura_brasiliensis</i>                           | 2          | SRR12282959 |
| <i>Malcura thorellii</i> (Gagnep.) Corner                            | Chlorophorae | Pierre 4709                                    | Cambodia                                 | 1870 | NY                 | <i>Maclura_thorellii</i>                              | 2          | SRR12282954 |
| <i>Maquira coriacea</i> (H.Karst.) C.C. Berg                         | Olmedieae    | Altamirano Azurduy, Saúl 3387                  | Bolivia                                  | 2006 | MO                 | <i>Maquira_coriacea_Altamirano_3387</i>               | this study | SRR24706209 |
| <i>Maquira guianensis</i>                                            | Olmedieae    | Perez et al. 4216                              | Ecuador                                  | 2009 | F 2302650          | <i>Maquira_guianensis_F_2302650</i>                   | this study | SRR24706208 |
| <i>Maquira guianensis</i> subsp. <i>costaricana</i>                  | Olmedieae    | F 2251117                                      |                                          |      | F 2251117          | <i>Maquira_guianensis_subsp_costaricana_F_2251117</i> | this study | SRR24706207 |
| <i>Maquira sclerophylla</i> (Ducke) C.C. Berg                        | Olmedieae    | Sabatier, Daniel R. L. 5326                    | French Guiana                            | 2007 | MO                 | <i>Maquira_sclerophylla_Sabatier_5326</i>             | this study | SRR24706206 |
| <i>Mesogyne insignis</i>                                             | Olmedieae    | M.A. Mwangoka 161                              |                                          |      | MO                 | <i>Mesogyne_insignis</i>                              | 1          |             |
| <i>Milicia excelsa</i> (Welw.) C.C.Berg                              | Moreae       | McPherson 16087                                | Gabon                                    | 1993 | US                 | <i>Milicia_excelsa</i>                                | 7          | SRR12283108 |

|                                            |                         |                                  |                            |      |                  |                                              |                                     |             |
|--------------------------------------------|-------------------------|----------------------------------|----------------------------|------|------------------|----------------------------------------------|-------------------------------------|-------------|
| <i>Milicia regia</i> (A.Chev.)<br>C.C.Berg | Moreae                  | Cooper 332<br>Gardner MOR        | Liberia<br>USA Illinois    |      | F                | <i>Milicia_regia</i>                         | 2                                   | SRR12282949 |
| <i>Morus alba</i> L.                       | Moreae                  | 920-26*1<br>Gardner MOR          | cultivated<br>USA Illinois | 2018 | MOR              | <i>Morus_alba</i>                            | 2                                   | SRR12282946 |
| <i>Morus australis</i> Poir.               | Moreae                  | 241-71*6                         | cultivated                 | 2018 | MOR<br>China     | <i>Morus_australis</i>                       | 2                                   | SRR12282942 |
| <i>Morus sp.</i>                           | Moreae                  | Nie Min-xiang 92144              |                            | MOR  | Jiangxi          | <i>Morus_cathayana</i>                       | 2                                   | SRR12282939 |
| <i>Morus celtidifolia</i> Kunth            | Moreae                  | Sandoval & Gutierrez 637         |                            | MO   | Mexico           | <i>Morus_celtidifolia</i>                    | 2                                   | SRR12282937 |
| <i>Morus sp.</i>                           | Moreae                  | AA20187-A                        | USA cult from Algeria      |      | F                | <i>Morus_kagayamai</i>                       | 2                                   | SRR12282931 |
| <i>Morus macroua</i> Miq.                  | Moreae                  | Gardner 28                       | USA Florida                | 2013 | CHIC             | <i>Morus_macroua</i>                         | 2                                   | SRR12282930 |
| <i>Morus microphylla</i><br>Buckley        | Moreae                  | Stone & al. 4225<br>Gardner MOR  | USA Texas<br>USA Illinois  | 2004 | MO               | <i>Morus_microphylla</i>                     | 2                                   | SRR12282926 |
| <i>Morus sp.</i>                           | Moreae                  | 55-95*1                          | cultivated<br>USA Florida  | 2018 | MOR              | <i>Morus_mongolica</i>                       | 2                                   | SRR12282925 |
| <i>Morus sp.</i>                           | Moreae                  | Gardner 29                       | cultivated                 | 2013 | CHIC             | <i>Morus_nigra</i>                           | 2<br>NCBI<br>BioProject<br>PRJNA503 | SRR12282924 |
| <i>Morus notabilis</i><br>C.K.Schneid.     | Moreae                  | unknown                          | China                      |      |                  | <i>Morus_notabilis</i>                       | 114                                 | SRR8138828  |
| <i>Morus rubra</i> L.                      | Moreae                  | Gardner 141                      | USA Florida                | 2015 | CHIC             | <i>Morus_rubra</i>                           | 2                                   | SRR12282922 |
| <i>Morus serrata</i> Roxb.                 | Moreae                  | Koelz 4788                       | India                      |      | F                | <i>Morus_serrata</i>                         | 2                                   | SRR12282920 |
| <i>Myriocarpa obovata</i>                  | Outgroup:<br>Urticaceae | Monro, A.K. 6534<br>Prance & al. |                            |      | K                | <i>Myriocarpa_obovata</i>                    | 14                                  | ERR5033890  |
| <i>Naucleopsis caloneura</i>               | Olmedieae               | P25386<br>Haber &                | Brazil                     | 1977 | F 2143090        | <i>Naucleopsis_caloneura</i><br>_F_2143090   | this study                          | SRR24706205 |
| <i>Naucleopsis capirensis</i>              | Olmedieae               | Zuchowski 11845<br>Quizhpe & al. | Costa Rica                 | 1994 | F 2312425        | <i>Naucleopsis_capirensis</i><br>_F_2312425  | this study                          | SRR24706204 |
| <i>Naucleopsis francisci</i>               | Olmedieae               | 740<br>Graham &<br>Schunke Vigo  | Ecuador                    | 2005 | F 2311189        | <i>Naucleopsis_francisci</i><br>_F_2311189   | this study                          | SRR24706203 |
| <i>Naucleopsis glabra</i>                  | Olmedieae               | 780<br>Aguilar & Castro          | Peru                       | 2000 | F 2312782        | <i>Naucleopsis_glabra</i><br>_F_2312782      | this study                          | SRR24706202 |
| <i>Naucleopsis krukovii</i>                | Olmedieae               | 703                              | Peru                       | 2002 | F 2285867<br>K   | <i>Naucleopsis_krukovii</i><br>_F_2285867    | this study                          | SRR24706201 |
| <i>Naucleopsis macrophylla</i><br>Miq.     | Olmedieae               | Berg & al. 18534<br>Hammel &     | Brazil                     | 1973 | (K00094683<br>2) | <i>Naucleopsis_macrophylla</i><br>_Berg18534 | 2                                   | ERS4414215  |
| <i>Naucleopsis naga</i>                    | Olmedieae               | Trainer 12923                    | Costa Rica                 | 1982 | F 2047822        | <i>Naucleopsis_naga</i><br>_F_2047822        | this study                          | SRR24706199 |

|                                                                       |                      |                                                                     |                   |      |           |                                              |            |             |
|-----------------------------------------------------------------------|----------------------|---------------------------------------------------------------------|-------------------|------|-----------|----------------------------------------------|------------|-------------|
| <i>Naucleopsis pseudonaga</i>                                         | Olmedieae            | Graham & Schunke Vigo 1026                                          | Peru              | 2000 | F 2312795 | Naucleopsis_pseudonaga_F_2312795             | this study | SRR24706198 |
| <i>Naucleopsis ternstroemiiflora</i>                                  | Olmedieae            | Berg & al. P18467                                                   | Brazil            | 1973 | F 1826476 | Naucleopsis_ternstroemiiflora_F_1826476      | this study | SRR24706197 |
| <i>Naucleopsis ulei subsp amara</i>                                   | Olmedieae            | Graham 2411                                                         | Peru              | 2003 | F 2312797 | Naucleopsis_ulei_subsp_amara_F_2312797       | this study | SRR24706196 |
| <i>Noyera mollis</i>                                                  | Olmedieae            | Ledezma 963                                                         | Bolivia           | 2006 | F         | Noyera_mollis_Ledezma_963_F                  | this study | SRR24706191 |
| <i>Noyera rubra</i>                                                   | Olmedieae            | Silva 2935                                                          | Brazil            | 1970 | F         | Noyera_rubra_Silva_2935_F                    | this study | SRR24706190 |
| <i>Olmedia aspera</i> Ruiz & Pav.                                     | Olmedieae            | Fuentes & al. 5323                                                  | Bolivia           | 2002 | MO        | Olmedia_aspera                               | 2          | SRR12282905 |
| <i>Oreocnide trinervis</i>                                            | Outgroup: Urticaceae | Andau, D. 2015                                                      |                   |      | K         | Oreocnide_trinervis                          | 14         | ERR5033423  |
| <i>Parartocarpus bracteatus</i> (King) Becc.                          | Parartocarpeae       | Zerega & al. 730                                                    | Malaysia (Borneo) | 2013 | F, SAN    | Parartocarpus_bracteatus                     | 7          | SRR12282873 |
| <i>Parartocarpus venenosus</i> (Zoll. ex Moritzi) Becc.               | Parartocarpeae       | Zerega & al. 874                                                    | Malaysia (Borneo) | 2013 | F, SAN    | Parartocarpus_venenosus                      | 4          | SRR12283105 |
| <i>Paratrophis anthropophagorum</i> (Seem.) Benth. & Hook.f. ex Drake | Moreae               | Degener 4698                                                        | Fiji              | 1941 | F         | Paratrophis_anthropophagorum                 | 2          | SRR12282876 |
| <i>Paratrophis australiana</i> C.T.White                              | Moreae               | Hyland 10634                                                        | Australia         | 1980 | BO        | Paratrophis_australiana                      | 2          | SRR12282872 |
| <i>Paratrophis glabra</i> (Merr.) Steenis                             | Moreae               | Gardner & al. 78                                                    | Malaysia (Borneo) | 2014 | F, SAN    | Paratrophis_glabra                           | 2          | SRR3907307  |
| <i>Paratrophis insignis</i> (Bureau) E.M.Gardner                      | Moreae               | Monteagudo & al. 3734                                               | Peru              | 2002 | F         | Paratrophis_insignis                         | 2          | SRR12282935 |
| <i>Paratrophis microphylla</i> (Raoul) Cockayne                       | Moreae               | Beecher sn                                                          | New Zealand       | 1942 | F         | Paratrophis_microphylla                      | 2          | SRR12282870 |
| <i>Paratrophis pendulina</i> (Endl.) E.M.Gardner                      | Moreae               | Fosberg 12877                                                       | USA Hawaii        | 1936 | F         | Paratrophis_pendulina                        | 2          | SRR12282862 |
| <i>Paratrophis philippinensis</i> (Bureau) Fern.-Vill.                | Moreae               | Brambach 465                                                        | Sulawesi          | 2011 | BO        | Paratrophis_philippinensis                   | 2          | SRR12283087 |
| <i>Parietaria judaica</i>                                             | Outgroup: Urticaceae | Fay, M.F. 185                                                       |                   |      | K         | Parietaria_judaica                           | 14         | ERR5033411  |
| <i>Pellionia repens</i>                                               | Outgroup: Urticaceae | Chantaranonthai, P.; Parnell, J.; Simpson, D.; Sridit, K. 90/74 (K) |                   |      | K         | Pellionia_repens                             | 14         |             |
| <i>Perebea angustifolia</i>                                           | Olmedieae            | Araya 479                                                           | Costa Rica        | 1994 | F         | Perebea_angustifolia_Araya_479_F             | this study | SRR24706195 |
| <i>Perebea guianensis</i> Aubl. subsp. <i>guianensis</i>              | Olmedieae            | Moya Huanca, Araceli Laura 142                                      | Bolivia           | 2008 | MO        | Perebea_guianensis_subsp_guianensis_Moya_142 | this study | SRR24706194 |

|                                                                 |                    |                                   |            |      |                       |                                                        |            |             |
|-----------------------------------------------------------------|--------------------|-----------------------------------|------------|------|-----------------------|--------------------------------------------------------|------------|-------------|
| <i>Perebea guianensis</i> subsp<br><i>hirsuta</i>               | Olmedieae          | Graham 2336                       |            | 2003 | F                     | Perebea_guianensis_su<br>bsp_hirsuta_Graham_<br>2336_F | this study | SRR24706193 |
| <i>Perebea humili</i>                                           | Olmedieae          | R Foster 11037                    | Peru       | 1985 | F                     | Perebea_humilis_R_F<br>oster_11037_F                   | this study | SRR24706192 |
| <i>Perebea xanthochyma</i>                                      | Olmedieae          | Aguilar 10866                     |            | 2008 | F                     | Perebea_xanthochyma<br>_Aguilar_10866_F                | this study | SRR24706188 |
| <i>Pilea longicaulis</i>                                        | Urticaceae         | Monro, A. 7590                    |            |      | K                     | Pilea_longicaulis                                      | 14         | ERR5033667  |
| <i>Poikilospermum nobile</i>                                    | Urticaceae         | Utteridge, T. 386                 |            |      | K                     | Poikilospermum_nobil<br>e                              | 14         | ERR4009282  |
| <i>Poulsenia armata</i>                                         | Olmedieae          | K. Thomsen 573                    | Costa Rica | 1993 | C10011557             | Poulsenia_armata_C10<br>011557                         | this study | SRR24706187 |
| <i>Pouzolzia zeylanica</i>                                      | Urticaceae         | J. Sibill 83                      |            |      | K                     | Pouzolzia_zeylanica                                    | 14         | ERR5033419  |
| <i>Pseudolmedia laevigata</i><br>Trécul                         | Olmedieae          | Neill, David Alan<br>15741        | Ecuador    | 2007 | MO                    | Pseudolmedia_laevigat<br>a_Neill_15741                 | this study | SRR24706186 |
| <i>Pseudolmedia laevis</i><br>(Ruiz & Pav.) J.F. Macbr.         | Olmedieae          | Moya Huanca,<br>Araceli Laura 144 | Bolivia    | 2008 | MO                    | Pseudolmedia_laevis_<br>Moya_144                       | this study | SRR24706185 |
| <i>Pseudolmedia rigida</i><br>(Klotzsch & H.Karst.)<br>Cuatrec. | Olmedieae          | Moya Huanca,<br>Araceli Laura 207 | Bolivia    | 2008 | MO<br>K<br>(K00125776 | Pseudolmedia_rigida_<br>Moya_207                       | this study | SRR24706129 |
| <i>Pseudolmedia spuria</i>                                      | Olmedieae          | Lobo & al. 263                    |            | 2001 | 0)                    | Pseudolmedia_spuria_<br>Lobo263                        | 2          | ERS4414224  |
| <i>Pseudostreblus indicus</i><br>Bureau                         | Parartocarp<br>eae | Newman & al<br>LA0518             | Laos       | 2005 | SING                  | Pseudostreblus_indicu<br>s                             | 2          | SRR12282866 |
| <i>Scyphosyce manniana</i>                                      | Dorstenieae        | H.F. 1220(P)                      |            | 1987 |                       | Scyphosyce_manniana                                    | 8          |             |
| <i>Scyphosyce pandurata</i>                                     | Dorstenieae        | D.W. Thomas 6869(P)               |            | 1987 |                       | Scyphosyce_pandurata                                   | 3          | SRR13188660 |
| <i>Sloetia elongata</i>                                         | Dorstenieae        | P. Thomas & L.E. Teo no number(P) |            | 1992 |                       | Sloetia_elongata                                       | 3          | SRR13188659 |
| <i>Sloetiopsis usambarensis</i><br>Engl.                        | Dorstenieae        | Faden & al<br>77/417              | Kenya      | 1977 | F                     | Sloetiopsis_usambaren<br>sis                           | 2          | SRR12282916 |
| <i>Sorocea affinis</i> Hemsl                                    | Moreae             | Espinosa 706                      | Costa Rica | 1992 | F                     | Sorocea_affinis                                        | 2          | SRR12282915 |
| <i>Sorocea bonplandii</i><br>(Baill.) W.C.Burger                | Moreae             | Stevens & al.<br>30948            | Paraguay   | 2011 | MO                    | Sorocea_bonplandii                                     | 2          | SRR12282914 |
| <i>Sorocea briquetii</i><br>J.F.Macbr                           | Moreae             | Valenzula &<br>Huamantupa 954     | Peru       | 2002 | F                     | Sorocea_briquetii                                      | 2          | SRR12283085 |
| <i>Sorocea duckei</i><br>W.C.Burger                             | Moreae             | Stein & Kallunki<br>3931          | Peru       | 1987 | F                     | Sorocea_duckei                                         | 2          | SRR12282911 |
| <i>Sorocea guillemianiana</i><br>Gaudich.                       | Moreae             | Moya & al. 112                    | Bolivia    | 2008 | MO                    | Sorocea_guillemianiana                                 | 2          | SRR12283035 |
| <i>Sorocea hilarii</i> Gaudich.                                 | Moreae             | Carauta 795                       | Brazil     | 1969 | F                     | Sorocea_hilarii                                        | 2          | SRR12282956 |

|                                                                                                              |           |                                                 |                                      |      |                  |                                                       |            |             |
|--------------------------------------------------------------------------------------------------------------|-----------|-------------------------------------------------|--------------------------------------|------|------------------|-------------------------------------------------------|------------|-------------|
| <i>Sorocea jaramilloi</i><br>C.C.Berg                                                                        | Moreae    | Madison 4772                                    | Ecuador                              | 1978 | F                | <i>Sorocea_jaramilloi</i>                             | 2          | SRR12282934 |
| <i>Sorocea muriculata</i> Miq.<br>subsp. <i>muriculata</i>                                                   | Moreae    | Vigo & Graham<br>16489                          | Peru                                 | 2004 | F                | <i>Sorocea_muriculata_s</i><br><i>ubsp_muriculata</i> | 2          | SRR12282923 |
| <i>Sorocea muriculata</i> Miq.<br>subsp. <i>uaupensis</i> (Baill.)<br>C.C. Berg                              | Moreae    | Plowman sn                                      | Venezuela                            | 1982 | F                | <i>Sorocea_muriculata_s</i><br><i>ubsp_uaupensis</i>  | 2          | SRR12282912 |
| <i>Sorocea pubivena</i> Hemsl.<br>subsp. <i>hirtella</i> (Mildbr.)<br>C.C. Berg                              | Moreae    | Vasquez & al.<br>19236                          | Peru                                 | 1994 | F                | <i>Sorocea_pubivena_sub</i><br><i>sp_hirtella</i>     | 2          | SRR12282880 |
| <i>Sorocea pubivena</i> Hemsl.<br>subsp. <i>oligotricha</i><br>(Akkermans & C.C.<br>Berg)                    | Moreae    | Kennedy 2124                                    | Panama                               | 1973 | F                | <i>Sorocea_pubivena_sub</i><br><i>sp_oligotricha</i>  | 2          | SRR12282945 |
| <i>Sorocea pubivena</i> Hemsl.<br>subsp. <i>pubivena</i>                                                     | Moreae    | Galdames 4477                                   | Panama                               | 2000 | F                | <i>Sorocea_pubivena_sub</i><br><i>sp_pubivena</i>     | 2          | SRR12282871 |
| <i>Sorocea sprucei</i> (Baill.)<br><i>J.F.Macbr.</i> subsp.<br><i>saxicola</i> (Hassl.)<br>C.C.Berg          | Moreae    | Nee 35729                                       | Bolivia                              | 1987 | F                | <i>Sorocea_sprucei_subs</i><br><i>p_saxicola</i>      | 2          | SRR12282860 |
| <i>Sorocea steinbachii</i><br>C.C.Berg                                                                       | Moreae    | Weiblen & al.<br>1501                           | Brazil                               | 2000 | MIN              | <i>Sorocea_steinbachii</i>                            | 2          | SRR12283107 |
| <i>Sorocea subumbellata</i><br>(C.C. Berg) Cornejo                                                           | Moreae    | Dodson 9601                                     | Ecuador                              | 1980 | F                | <i>Sorocea_subumbellata</i>                           | 2          | SRR12283084 |
| <i>Sorocea trophoides</i><br><i>W.C.Burger</i>                                                               | Moreae    | Fuentes 304                                     | Costa Rica                           | 1993 | F<br>K           | <i>Sorocea_trophoides</i>                             | 2          | SRR12282877 |
| <i>Sparattosyce dioica</i><br>Bureau                                                                         | Olmedieae | Weiblen 1223                                    | New Caledonia                        | 2001 | (K00061825<br>3) | <i>Sparratosyce_dioica_</i><br><i>Weiblen1223</i>     | 2          | ERS4414234  |
| <i>Streblus asper</i> (Retz.)<br><i>Lour.</i>                                                                | Olmedieae | Gardner 696<br>Hoang &<br>Averyanov CBL<br>1644 | Indonesia Java<br>cultivated         | 2018 | F                | <i>Streblus_asper_EG696</i>                           | 2          | SRR12282875 |
| <i>Streblus tonkinensis</i>                                                                                  | Olmedieae |                                                 | Vietnam, Cao Bang,<br>Ha Lang Distr. | 1999 | MO               | <i>Streblus_tonkinensis_</i><br><i>Hoang_CBL1644</i>  | this study | SRR24706128 |
| <i>Taxotrophis ilicifolia</i><br>(Kurz) <i>S. Vidal</i>                                                      | Moreae    | Gardner & al. 720                               | Singapore cultivated<br>from Johor   | 2018 | SING             | <i>Taxotrophis_ilicifolia</i>                         | 2          | SRR12282874 |
| <i>Taxotrophis macrophylla</i><br>(Blume) <i>Boerl.</i>                                                      | Moreae    | Scornickova & al.<br>JLS 2916                   | Vietnam                              | 2014 | SING             | <i>Taxotrophis_macrophylla</i>                        | 2          | SRR12282857 |
| <i>Taxotrophis spinosa</i><br>(Blume) <i>Steenis</i>                                                         | Moreae    | Gardner & al. 702                               | Indonesia, Java, cult.               | 2018 | F                | <i>Taxotrophis_spinosa</i>                            | 2          | SRR12282856 |
| <i>Taxotrophis taxoides</i> ( <i>B.</i><br><i>Heyne ex Roth</i> ) <i>W.L.</i><br><i>Chew ex E.M. Gardner</i> | Moreae    | Gardner & al. 701                               | Indonesia, Java, cult.               | 2018 | F                | <i>Taxotrophis_taxoides</i>                           | 2          | SRR12282855 |
| <i>Taxotrophis zeylanica</i><br>(Thwaites) <i>Thwaites</i>                                                   | Moreae    | Meijer 701                                      | Sri Lanka                            | 1971 | SING             | <i>Taxotrophis_zeylanica</i>                          | 2          | SRR12282853 |

|                                         |                          |                                     |             |      |    |                                    |    |             |
|-----------------------------------------|--------------------------|-------------------------------------|-------------|------|----|------------------------------------|----|-------------|
| <i>Treculia acuminata</i>               | Dorstenieae              | J.J. Floret, A.M. Louis 1351(P)     |             | 1983 |    | <i>Treculia_acuminata</i>          | 8  |             |
| <i>Treculia africana</i>                | Dorstenieae              | N. Zerega 909 (SAN)                 |             | 2013 |    | <i>Treculia_africana</i>           | 3  | SRR13188658 |
| <i>Treculia obovoidea</i>               | Dorstenieae              | Cheek, M. 15081(P)                  |             | 2009 |    | <i>Treculia_obovoidea</i>          | 8  |             |
| <i>Trema orientale</i> (L.) Blume       | Outgroup:<br>Cannabaceae | unknown                             | Netherlands |      |    | <i>Trema_orientale</i>             | 15 | SRR5674478  |
| <i>Trilepisium madagascariense</i>      | Dorstenieae              | Z. Ranktonirina & Georges Be 197(P) |             | 2013 |    | <i>Trilepisium_madagascariense</i> | 3  | SRR13188657 |
| <i>Trophis cuspidata</i> Lundell        | Moreae                   | Dominuez 774                        | Mexico      | 2004 | MO | <i>Trophis_cuspidata</i>           | 2  | SRR12282852 |
| <i>Trophis involucrata</i> W.C.Burger   | Moreae                   | Aguilar 4679                        | Costa Rica  | 1996 | F  | <i>Trophis_involucrata</i>         | 2  | SRR12283089 |
| <i>Trophis mexicana</i> (Liebm.) Bureau | Moreae                   | Stevens & Montiel 27939             | Nicaragua   |      | MO | <i>Trophis_mexicana</i>            | 2  | SRR12282883 |
| <i>Trophis racemosa</i> (L.) Urb.       | Moreae                   | Stevens 37196                       | Nicaragua   | 2016 | MO | <i>Trophis_racemosa</i>            | 2  | SRR12283112 |
| <i>Urtica urens</i> L.                  | Outgroup:<br>Urticaceae  | Fay 173                             |             | 2000 | K  | <i>Urtica_urens</i>                | 2  | ERS4414127  |
| <i>Utsetela gabonensis</i> Pellegr.     | Dorstenieae              | Breteler 14086                      | Gabon       | 1997 | MO | <i>Utsetela_gabonensis</i>         | 2  | SRR12283083 |
| <i>Utsetela neglecta</i> Jongkind       | Dorstenieae              | Bissiengou 923                      | Gabon       | 2009 | MO | <i>Utsetela_neglecta</i>           | 2  | SRR12283082 |



**Table S2.** Networks scores for all returned maximum pseudo-likelihood networks for (A) sample set 1 representing major nuclear lineages, (B) sample set 2 representing discordance between the nuclear and chloroplast topologies, and (C) the analysis based on 13,586 nuclear genes, showing number of allowed reticulations (r), network score as log probability, number of parameters (k), improvement in the network score compared to the best-scoring network with zero reticulations, AICc and BIC.

**A. Sampling scheme 1 (42 samples)**

| r        | log probability  | k         | improvement       | AICc              | BIC               |
|----------|------------------|-----------|-------------------|-------------------|-------------------|
| 0        | -10277704        | 42        | 0                 | 20555492.3        | 20555807.8        |
| 0        | -10277708        | 42        | -3.89E-05         | 20555500.3        | 20555815.8        |
| 0        | -10277736        | 42        | -0.000315         | 20555557.1        | 20555872.5        |
| 0        | -10277770        | 42        | -0.0006436        | 20555624.6        | 20555940.1        |
| 0        | -10277778        | 42        | -0.0007192        | 20555640.2        | 20555955.6        |
| 1        | -10273034        | 46        | 0.04544223        | 20546159.6        | 20546505          |
| 1        | -10273076        | 46        | 0.04502928        | 20546244.5        | 20546589.9        |
| 1        | -10273382        | 46        | 0.04205609        | 20546855.6        | 20547201.1        |
| 1        | -10273927        | 46        | 0.03675175        | 20547945.9        | 20548291.4        |
| 1        | -10274445        | 46        | 0.03170955        | 20548982.4        | 20549327.8        |
| 2        | -10268154        | 50        | 0.09291838        | 20536408.7        | 20536784.2        |
| 2        | -10269056        | 50        | 0.08414636        | 20538211.8        | 20538587.3        |
| 2        | -10269410        | 50        | 0.08069852        | 20538920.6        | 20539296          |
| 2        | -10269439        | 50        | 0.0804208         | 20538977.6        | 20539353.1        |
| 2        | -10269486        | 50        | 0.07996413        | 20539071.5        | 20539447          |
| 3        | -10267544        | 54        | 0.09885089        | 20535197.3        | 20535602.8        |
| 3        | -10267707        | 54        | 0.09726574        | 20535523.2        | 20535928.6        |
| 3        | -10267897        | 54        | 0.09542238        | 20535902.1        | 20536307.5        |
| 3        | -10268278        | 54        | 0.09171535        | 20536664.1        | 20537069.5        |
| 3        | -10268294        | 54        | 0.09155679        | 20536696.6        | 20537102.1        |
| <b>4</b> | <b>-10265505</b> | <b>58</b> | <b>0.11869326</b> | <b>20531126.7</b> | <b>20531562.2</b> |
| 4        | -10266196        | 58        | 0.11197072        | 20532508.5        | 20532944          |
| 4        | -10266250        | 58        | 0.111448          | 20532616          | 20533051.5        |
| 4        | -10266580        | 58        | 0.10823217        | 20533277          | 20533712.5        |
| 4        | -10267036        | 58        | 0.10379894        | 20534188.3        | 20534623.8        |
| <b>5</b> | <b>-10265187</b> | <b>62</b> | <b>0.12178715</b> | <b>20530498.8</b> | <b>20530964.3</b> |
| 5        | -10265514        | 62        | 0.11860848        | 20531152.2        | 20531617.7        |
| 5        | -10265613        | 62        | 0.11763989        | 20531351.3        | 20531816.8        |
| 5        | -10265667        | 62        | 0.11711477        | 20531459.2        | 20531924.7        |
| 5        | -10265735        | 62        | 0.11645945        | 20531593.9        | 20532059.4        |
| 6        | -10266359        | 66        | 0.1103872         | 20532850.2        | 20533345.7        |

|   |           |    |            |            |            |
|---|-----------|----|------------|------------|------------|
| 6 | -10266422 | 66 | 0.10976777 | 20532977.5 | 20533473   |
| 6 | -10266560 | 66 | 0.10842788 | 20533252.9 | 20533748.4 |
| 6 | -10266625 | 66 | 0.10779777 | 20533382.5 | 20533877.9 |
| 6 | -10266951 | 66 | 0.10462557 | 20534034.5 | 20534530   |

### B. Sampling scheme 2 (27 samples)

| r        | log probability   | k         | improvement       | AICc              | BIC               |
|----------|-------------------|-----------|-------------------|-------------------|-------------------|
| 0        | -3196554          | 42        | 0                 | 6393192.23        | 6393507.67        |
| 0        | -3196643.6        | 42        | -0.0028045        | 6393371.53        | 6393686.96        |
| 0        | -3196662.5        | 42        | -0.0033941        | 6393409.22        | 6393724.66        |
| 0        | -3196686.4        | 42        | -0.0041425        | 6393457.06        | 6393772.5         |
| 0        | -3196801.1        | 42        | -0.0077321        | 6393686.55        | 6394001.99        |
| 1        | -3193097.5        | 46        | 0.10813244        | 6386287.26        | 6386632.71        |
| 1        | -3193106.8        | 46        | 0.10783937        | 6386306           | 6386651.45        |
| 1        | -3193117.7        | 46        | 0.10750017        | 6386327.68        | 6386673.13        |
| 1        | -3193132.6        | 46        | 0.10703187        | 6386357.62        | 6386703.07        |
| 1        | -3193507          | 46        | 0.09532171        | 6387106.26        | 6387451.72        |
| 2        | -3191499.7        | 50        | 0.15811653        | 6383099.78        | 6383475.24        |
| 2        | -3191674.7        | 50        | 0.15264263        | 6383449.73        | 6383825.19        |
| 2        | -3191703.2        | 50        | 0.15175111        | 6383506.73        | 6383882.19        |
| 2        | -3191704.2        | 50        | 0.15171933        | 6383508.76        | 6383884.22        |
| 2        | -3191876.4        | 50        | 0.14633072        | 6383853.26        | 6384228.72        |
| 3        | -3191185.2        | 54        | 0.167954          | 6382478.92        | 6382884.39        |
| 3        | -3191399.3        | 54        | 0.16125739        | 6382907.04        | 6383312.51        |
| 3        | -3191440.2        | 54        | 0.15997931        | 6382988.75        | 6383394.22        |
| 3        | -3191473.1        | 54        | 0.1589502         | 6383054.54        | 6383460.01        |
| 3        | -3191585.3        | 54        | 0.15543746        | 6383279.12        | 6383684.59        |
| <b>4</b> | <b>-3190478.8</b> | <b>58</b> | <b>0.19005534</b> | <b>6381074.03</b> | <b>6381509.49</b> |
| 4        | -3190764          | 58        | 0.18113048        | 6381644.6         | 6382080.07        |
| 4        | -3190860.7        | 58        | 0.178106          | 6381837.96        | 6382273.43        |
| 4        | -3190891.8        | 58        | 0.17713543        | 6381900.01        | 6382335.48        |
| 4        | -3190892.2        | 58        | 0.17712038        | 6381900.97        | 6382336.44        |
| <b>5</b> | <b>-3190395.7</b> | <b>62</b> | <b>0.19265411</b> | <b>6380915.96</b> | <b>6381381.42</b> |
| 5        | -3190455.7        | 62        | 0.19077821        | 6381035.88        | 6381501.35        |
| 5        | -3190500.7        | 62        | 0.18936872        | 6381125.99        | 6381591.46        |
| 5        | -3190608.4        | 62        | 0.18599901        | 6381341.42        | 6381806.89        |
| 5        | -3190657.7        | 62        | 0.1844585         | 6381439.91        | 6381905.37        |
| 6        | -3190490.9        | 66        | 0.189677          | 6381114.36        | 6381609.82        |

|   |            |    |            |            |            |
|---|------------|----|------------|------------|------------|
| 6 | -3190502.6 | 66 | 0.18930933 | 6381137.87 | 6381633.32 |
| 6 | -3190508.3 | 66 | 0.1891312  | 6381149.26 | 6381644.71 |
| 6 | -3190595.9 | 66 | 0.18639032 | 6381324.48 | 6381819.94 |
| 6 | -3190656.5 | 66 | 0.18449597 | 6381445.59 | 6381941.04 |

### C. WGS sampling

| r        | log probability  | k         | improvement       | AICc              | BIC               |
|----------|------------------|-----------|-------------------|-------------------|-------------------|
| 0        | -10813002        | 42        | 0                 | 21626088.6        | 21626404          |
| 0        | -10813003        | 42        | -1.01E-05         | 21626090.7        | 21626406.2        |
| 0        | -10813058        | 42        | -0.0005134        | 21626199.6        | 21626515          |
| 0        | -10813060        | 42        | -0.0005366        | 21626204.6        | 21626520          |
| 0        | -10816352        | 42        | -0.0309767        | 21632787.6        | 21633103          |
| 1        | -10811327        | 46        | 0.01549526        | 21622745.6        | 21623091.1        |
| 1        | -10812502        | 46        | 0.00462708        | 21625096          | 21625441.4        |
| 1        | -10812723        | 46        | 0.00257846        | 21625539          | 21625884.5        |
| 1        | -10812952        | 46        | 0.00046667        | 21625995.7        | 21626341.2        |
| 1        | -10812969        | 46        | 0.00030962        | 21626029.7        | 21626375.1        |
| 2        | -10803130        | 50        | 0.09129447        | 21606361.3        | 21606736.8        |
| 2        | -10803175        | 50        | 0.09088664        | 21606449.5        | 21606825          |
| 2        | -10803245        | 50        | 0.09023857        | 21606589.7        | 21606965.1        |
| 2        | -10803501        | 50        | 0.08786509        | 21607103          | 21607478.4        |
| 2        | -10803912        | 50        | 0.08406238        | 21607925.3        | 21608300.8        |
| 3        | -10803557        | 54        | 0.08734828        | 21607222.8        | 21607628.3        |
| 3        | -10803607        | 54        | 0.08688896        | 21607322.1        | 21607727.6        |
| 3        | -10803640        | 54        | 0.08658394        | 21607388.1        | 21607793.6        |
| 3        | -10803734        | 54        | 0.08571043        | 21607577          | 21607982.5        |
| 3        | -10808942        | 54        | 0.03754863        | 21617992.5        | 21618397.9        |
| 4        | -10792556        | 58        | 0.18908934        | 21585228.3        | 21585663.8        |
| 4        | -10792875        | 58        | 0.18613748        | 21585866.7        | 21586302.2        |
| 4        | -10794534        | 58        | 0.17079173        | 21589185.4        | 21589620.9        |
| 4        | -10804090        | 58        | 0.08241893        | 21608296.9        | 21608732.4        |
| 4        | -10804359        | 58        | 0.07993181        | 21608834.8        | 21609270.2        |
| <b>5</b> | <b>-10788551</b> | <b>62</b> | <b>0.22612906</b> | <b>21577226.2</b> | <b>21577691.7</b> |
| 5        | -10788576        | 62        | 0.22589648        | 21577276.5        | 21577742          |
| 5        | -10788783        | 62        | 0.22398138        | 21577690.7        | 21578156.1        |
| 5        | -10789497        | 62        | 0.21737481        | 21579119.4        | 21579584.9        |

|   |           |    |            |            |            |
|---|-----------|----|------------|------------|------------|
| 5 | -10789556 | 62 | 0.21683406 | 21579236.3 | 21579701.8 |
| 6 | -10790385 | 66 | 0.20916905 | 21580902.1 | 21581397.5 |
| 6 | -10790703 | 66 | 0.20622764 | 21581538.2 | 21582033.6 |
| 6 | -10790836 | 66 | 0.204996   | 21581804.5 | 21582300   |
| 6 | -10790927 | 66 | 0.20415176 | 21581987.1 | 21582482.5 |
| 6 | -10791063 | 66 | 0.20289394 | 21582259.1 | 21582754.6 |

**Table S3.** Fossil calibrations used in this study.

| <b>Clade</b>              | <b>Calibration (Min–Max)</b> | <b>Fossil taxon</b>                 | <b>Citation</b> |
|---------------------------|------------------------------|-------------------------------------|-----------------|
| Crown Moraceae+Urticaceae | 81.7–93.3                    | secondary calibration               | 16              |
| Crown Moraceae            | 73.2–84.7                    | secondary calibration               | 16              |
| Crown Artocarpeae         | 64–                          | † <i>Artocarpoxyton deccanensis</i> | 17              |
| Crown Dorstenieae         | 33.9–                        | † <i>Broussonetia rugosa</i>        | 18              |
| Stem Ficeae               | 56–                          | † <i>Ficus lucidus</i>              | 18              |
| Stem Pharmacosycea        | 16–                          | † <i>Tetrapus delclosi</i>          | 19              |
| Stem Americanae           | 17–                          | † <i>Pegoscapus peritus</i>         | 19              |
| Stem Galoglychia          | 34–                          | † <i>Archaegaon</i>                 | 20, 21          |
| Crown Boehmerieae         | 41.2–                        | † <i>Forskohleanthium nudum</i>     | 18              |
| Stem Boehmeria            | 23.03–                       | † <i>Boehmeria sibirica</i>         | 18              |
| Stem Pilea                | 23.03–                       | † <i>Pilea lithuanica</i>           | 18              |
| Crown Urticaceae          | 48.7–                        | †unnamed Leaf Type 1                | 22              |

## References

1. W. L. Clement, *et al.*, Evolution and classification of figs (Ficus, Moraceae) and their close relatives (Castilleae) united by involucre bracts. *Bot. J. Linn. Soc.* **193**, 316–339 (2020).
2. E. M. Gardner, *et al.*, Repeated parallel losses of inflexed stamens in Moraceae: phylogenomics and generic revision of the tribe Moreae and the reinstatement of the tribe Olmedieae (Moraceae). *Taxon* **70**, 946–988 (2021).
3. E. M. Gardner, *et al.*, Phylogenomics of *Brosimum* (Moraceae) and allied genera, including a revised subgeneric system. *TAXON* **70**, 778–792 (2021).
4. M. G. Johnson, *et al.*, HybPiper: Extracting Coding Sequence and Introns for Phylogenetics from High-Throughput Sequencing Reads Using Target Enrichment. *Appl. Plant Sci.* **4**, 1600016 (2016).
5. E. M. Gardner, *et al.*, Paralogs and Off-Target Sequences Improve Phylogenetic Resolution in a Densely Sampled Study of the Breadfruit Genus (*Artocarpus*, Moraceae). *Syst. Biol.* **70**, 558–575 (2021a).
6. E. M. Gardner, M. G. Johnson, D. Ragone, N. J. Wickett, N. J. C. Zerega, Low-Coverage, Whole-Genome Sequencing of *Artocarpus camansi* (Moraceae) for Phylogenetic Marker Development and Gene Discovery. *Appl. Plant Sci.* **4**, 1600017 (2016).
7. N. J. C. Zerega, E. M. Gardner, Delimitation of the new tribe Parartocarpeae (Moraceae) is supported by a 333-gene phylogeny and resolves tribal level Moraceae taxonomy. *Phytotaxa* **388**, 253–265 (2019).
8. Q. Zhang, E. Gardner, N. Zerega, H. Sauquet, Long-distance dispersal shaped the diversity of tribe Dorstenieae (Moraceae). *bioRxiv*, 531855 (2019).
9. Hu, Y., Peng, X., Wang, F. *et al.* Natural population re-sequencing detects the genetic basis of local adaptation to low temperature in a woody plant. *Plant Mol Biol* **105**, 585–599 (2021).
10. G. Wang, *et al.*, Genomic evidence of prevalent hybridization throughout the evolutionary history of the fig-wasp pollination mutualism. *Nat. Commun.* **12**, 718 (2021).
11. K. Shirasawa, *et al.*, The *Ficus erecta* genome aids *Ceratocystis* canker resistance breeding in common fig (*F. carica*). *The Plant Journal*, **102**, 1313–1322 (2020).
12. S. Xu, S. Guo, D. Fan & J. Wang, The complete chloroplast genome sequence of *Ficus formosana* Maxim (Moraceae) from Guangzhou, China, *Mitochondrial DNA Part B*, **6**, 1895–1896 (2021).
13. J. Fungjanthuek, Z.-R. Zhang, Y.-Q. Peng & J. Gao The complete chloroplast genome of two related fig species *Ficus squamosa* and *Ficus heterostyla*, *Mitochondrial DNA Part B*, **7**, 236–238 (2022).
14. W. J. Baker *et al.*, A Comprehensive Phylogenomic Platform for Exploring the Angiosperm Tree of Life, *Systematic Biology* **71**, 301–319 (2022).
15. R. Van Velzen, *et al.*, Comparative genomics of the nonlegume *Parasponia* reveals insights into evolution of nitrogen-fixing rhizobium symbioses. *Proceedings of the National Academy of Sciences*, **115**, E4700–E4709 (2018).
16. Q. Zhang *et al.*, Estimating divergence times and ancestral breeding systems in *Ficus* and Moraceae. *Ann. Bot.* **123**, 191–204 (2019).
17. R. C. Mehrotra, U. Prakash, M. B. Bande, Fossil woods of *Lophopetalum* and *Artocarpus* from the Deccan Intertrappean Beds of Mandla district, Madhya Pradesh, India. *Palaeobotanist* **32**, 310–320 (1984).
18. M. Collinson, The fossil history of the Moraceae, Urticaceae (including Cecropiaceae), and Cannabaceae. In: P. R. Crane, S. Blackmore, eds. *Evolution, systematics, and fossil history of the Hamamelidae* **2**, 319–339 (1989).
19. L. C. Pederneiras, *et al.*, The role of biogeographical barriers and bridges in determining divergent lineages in *Ficus* (Moraceae). *Botanical Journal of the Linnean Society*, **187**, 594–613 (2018).

20. S. G. Compton *et al.*, Ancient fig wasps indicate at least 34 Myr of stasis in their mutualism with fig trees. *Biology Letters*, **6**, 838–842 (2010).
21. A. V. Antropov *et al.*, The wasps, bees and ants (Insecta: Vespida = Hymenoptera) from the Insect Limestone (Late Eocene) of the Isle of Wight, UK. *Earth and Environmental Science Transactions of the Royal Society of Edinburgh*, **104**, 335-446 (2014).
22. M. L. DeVore *et al.*, Urticaceae leaves with stinging trichomes were already present in latest early Eocene Okanogan Highlands, British Columbia, Canada. *American Journal of Botany* **107**, 1449–1456 (2020).

**Dataset S1.** Available at <https://doi.org/10.5061/dryad.x0k6djhqg>

**ficus\_data/** data for the main *Ficus* analyses  
    **alignments/**  
    **gene\_trees/**  
    **species\_tree/**  
    **networks/**  
**chloroplast\_data/** data for the chloroplast analyses  
**wgs\_data/** data for the analyses based on whole-genome reads  
    **alignments/**  
    **gene\_trees/**  
    **species\_tree/**  
    **networks/**  
**moraceae\_data/** data for the Moraceae analyses  
    **alignments/**  
    **gene\_trees/**  
    **species\_tree/**  
    **time\_calibration/**  
    **biogeography/**  
**scripts/** scripts for conducting analyses and building figures  
**baits/** bait sequences used for target enrichment
